# Supplementary material for: Prodrug Strategies for the Development of β-l-5-((E)-2-Bromovinyl)-1-((2S,4S)-2-(hydroxymethyl)-1,3-(dioxolane-4-yl))uracil (l-BHDU) against Varicella Zoster Virus (VZV)
Source: PubMed Central journal article supplement (PMC10226046; doi:10.1021/acs.jmedchem.3c00545), 2023-05-04
Supplement: jm3c00545_si_001.pdf [file jm3c00545_si_001.pdf]

## Supporting Information

### Prodrug Strategies for the Development of $\beta$ -L-5-((E)-2-bromovinyl)-1-((2S,4S)-2-(hydroxymethyl)-1,3-(dioxolane-4-yl)uracil (L-BH DU) Against Varicella Zoster Virus (VZV)

Uma S. Singh,<sup>\*†</sup> Ananda K. Konreddy,<sup>†</sup> Yugandhar Kothapalli,<sup>†</sup> Dongmei Liu,<sup>‡</sup> Megan G. Lloyd,<sup>‡</sup> Vidya Annavarapu,<sup>†</sup> Catherine A. White,<sup>†</sup> Michael. G. Bartlett,<sup>†</sup> Jennifer F. Moffat,<sup>‡</sup> Chung K. Chu<sup>\*†</sup>

<sup>†</sup>Department of Pharmaceutical and Biomedical Science, College of Pharmacy, University of Georgia, Athens, Georgia 30602, United States

<sup>‡</sup>State University of New York, Upstate Medical University, Syracuse, NY 13210, United States

Corresponding author: Uma S. Singh, [ussingh@uga.edu](mailto:ussingh@uga.edu)

Corresponding author: Chung K. Chu, [dchu@uga.edu](mailto:dchu@uga.edu)

#### Table of Contents

| S.No | Description of data                                                                                                             | Page number |
|------|---------------------------------------------------------------------------------------------------------------------------------|-------------|
| 1.   | <sup>1</sup> H & <sup>13</sup> C NMR of L-BH DU-amino acid ester prodrugs ( <b>2-26</b> )                                       | S2 - S26    |
| 2.   | <sup>1</sup> H, <sup>13</sup> C & <sup>31</sup> P NMR of L-BH DU-phosphoramidate prodrugs ( <b>33-34</b> )                      | S27 - S29   |
| 3.   | <sup>1</sup> H, <sup>13</sup> C & <sup>31</sup> P NMR of ODE-L-BH DU-MP ( <b>38</b> ) and HDP-L-BH DU-MP ( <b>39</b> ) prodrugs | S30 - S32   |
| 4.   | <sup>1</sup> H, <sup>13</sup> C & <sup>31</sup> P NMR of POM-L-BH DU-MP ( <b>41</b> ) and POC-L-BH DU-MP ( <b>47</b> ) prodrugs | S33 - S35   |
| 5.   | Elemental Analysis data for final compounds                                                                                     | S-36        |
| 6.   | HPLC methods and trace for compounds <b>1, 24, 34, 38, 39,41 &amp; 47</b>                                                       | S37-S43     |

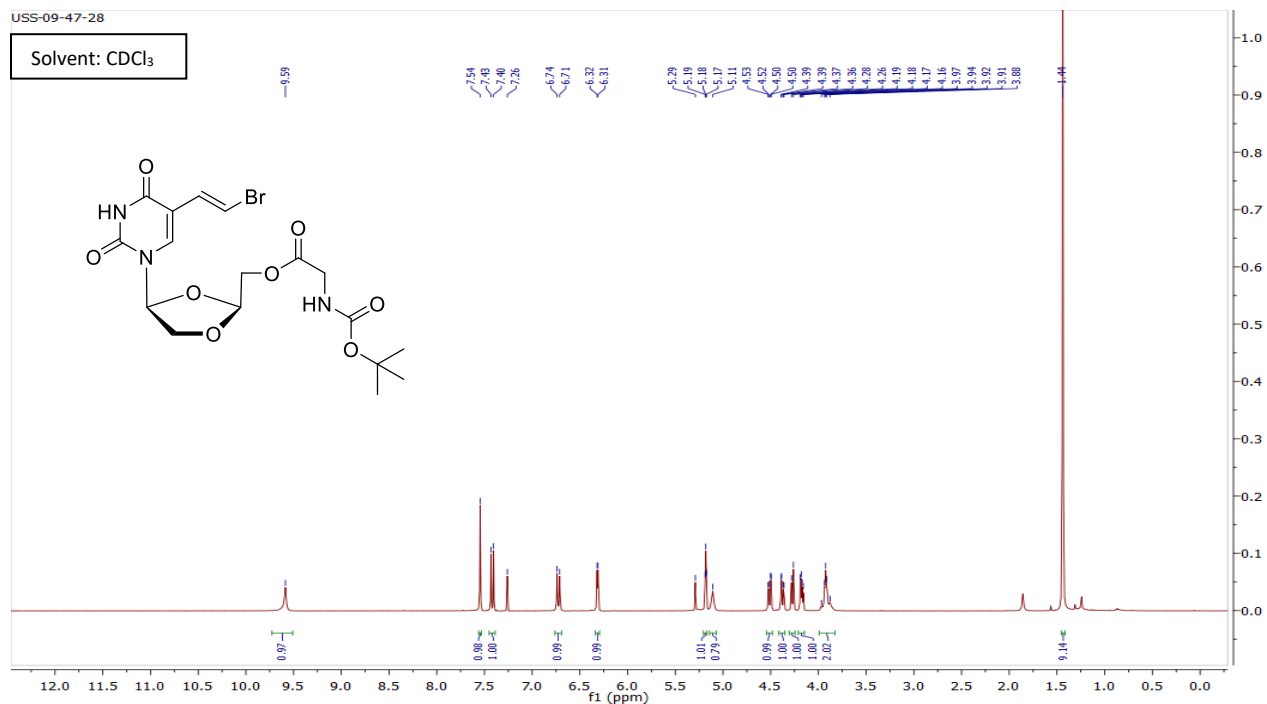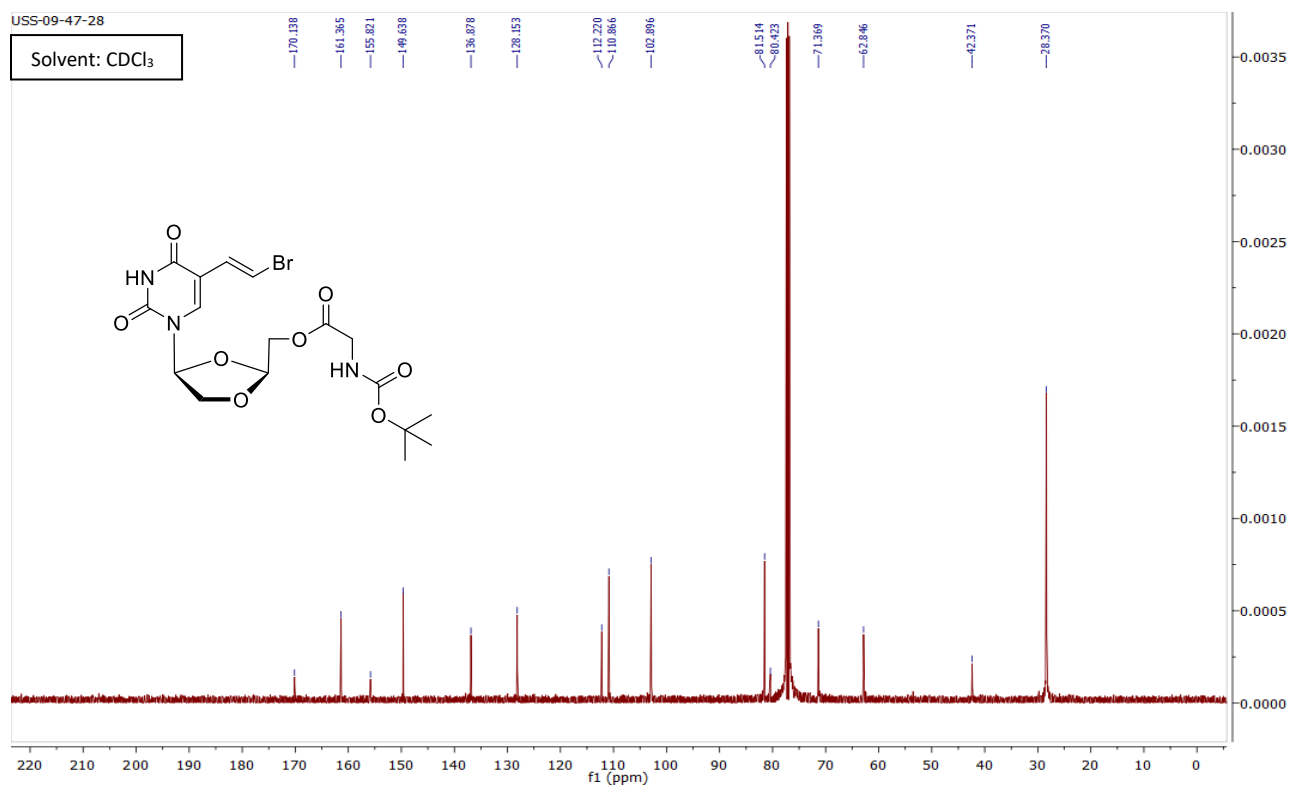

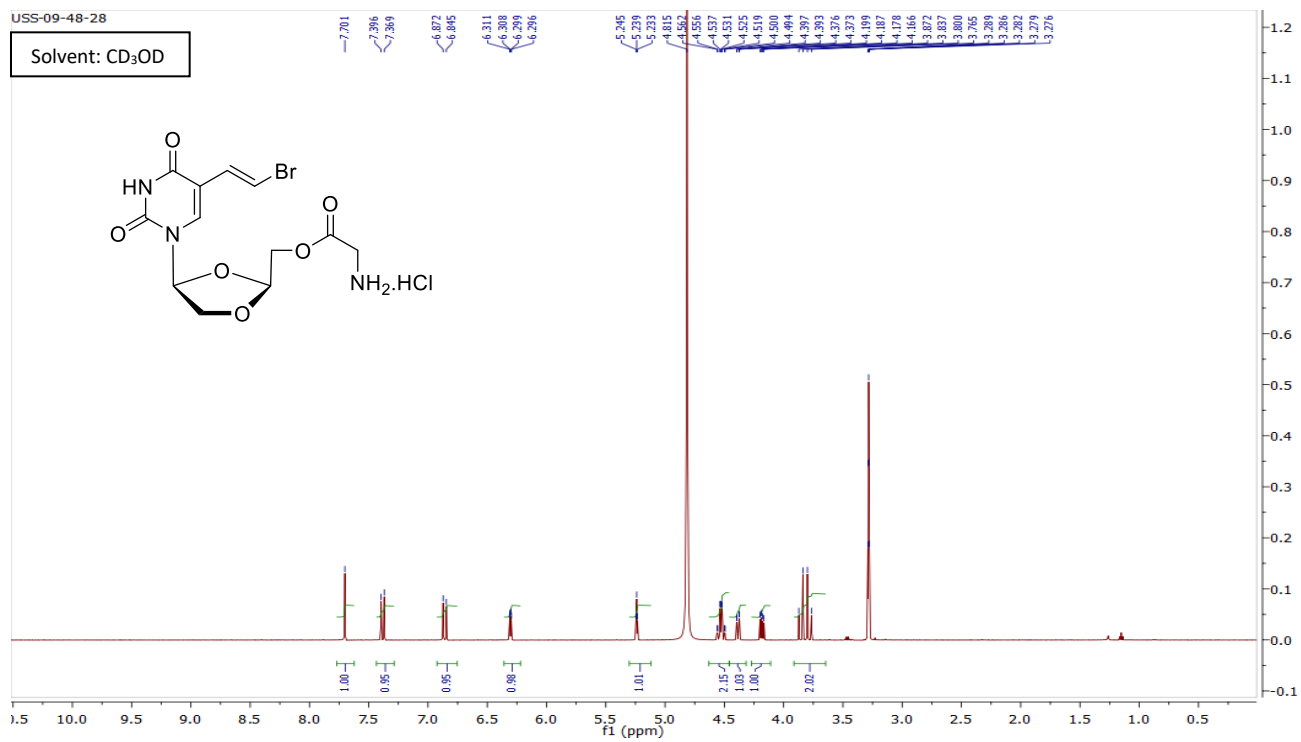

<sup>1</sup>H NMR of L-BH DU-5'-O-glycyl ester hydrochloride (**14**)

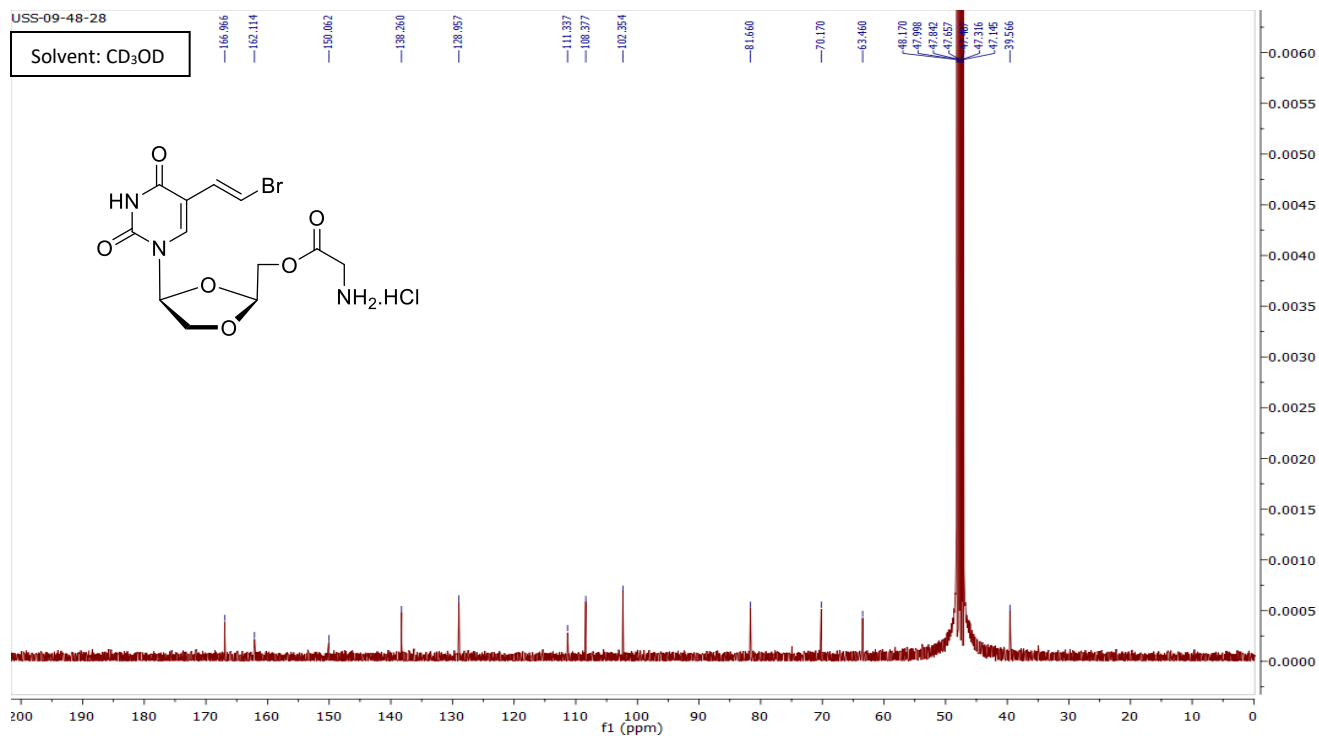

<sup>13</sup>C NMR of L-BH DU-5'-O-glycyl ester hydrochloride (**14**)

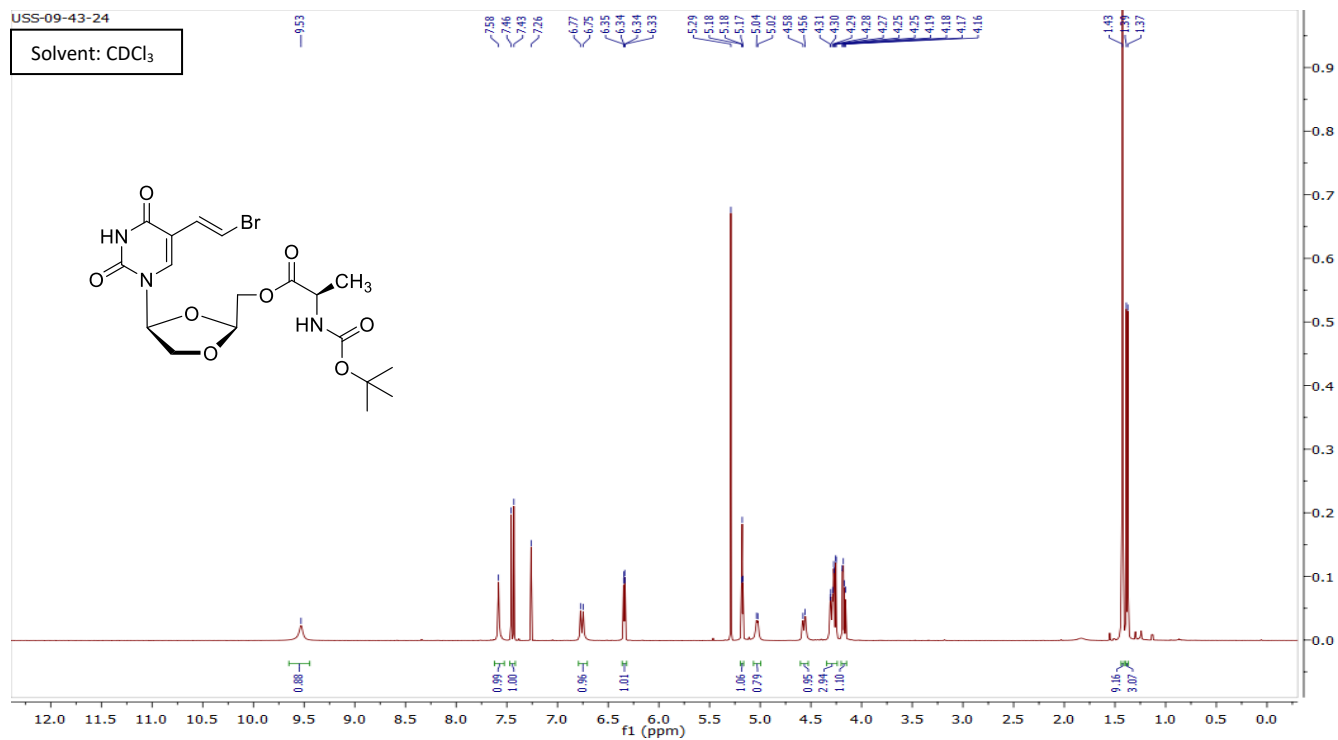

<sup>1</sup>H NMR of L-BH DU-5'-O-L- Boc-alanine ester (**3**)

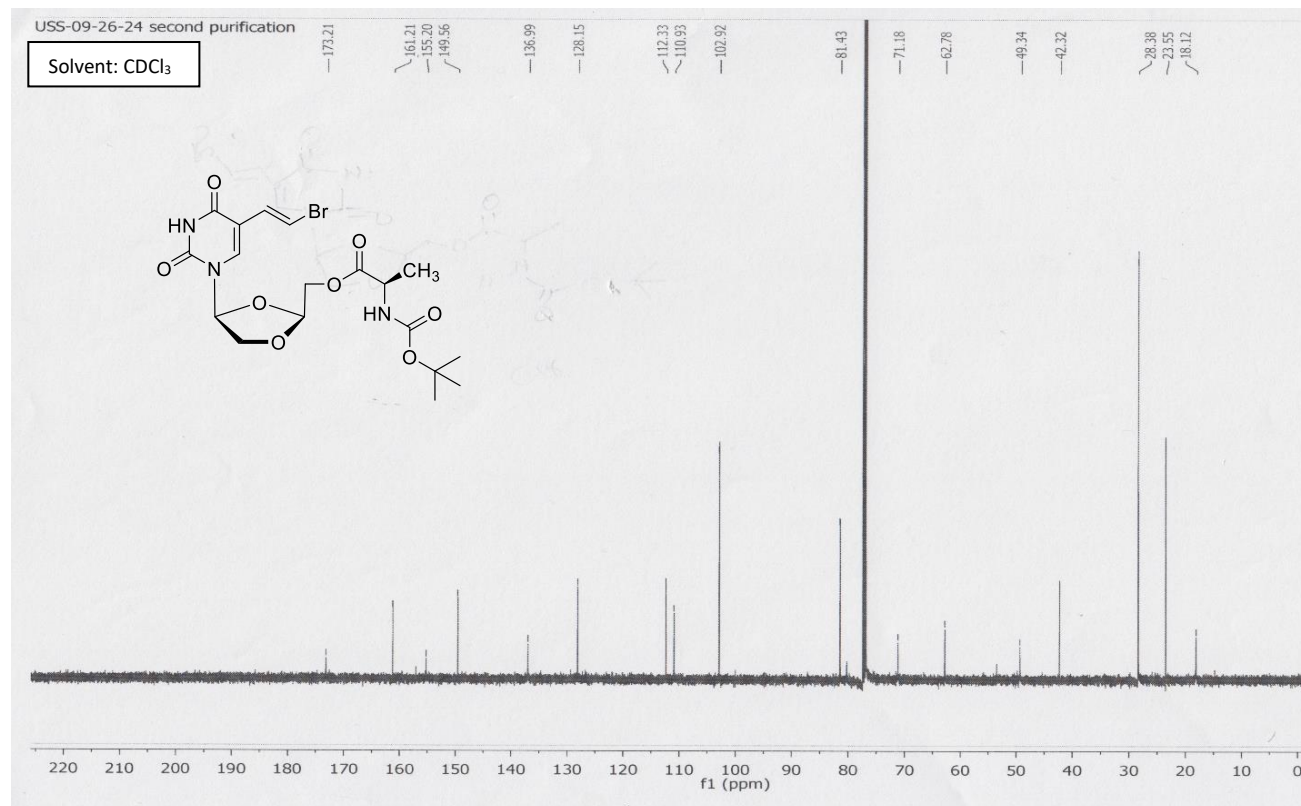

<sup>13</sup>C NMR of L-BH DU-5'-O-L- Boc-alanine ester (**3**)

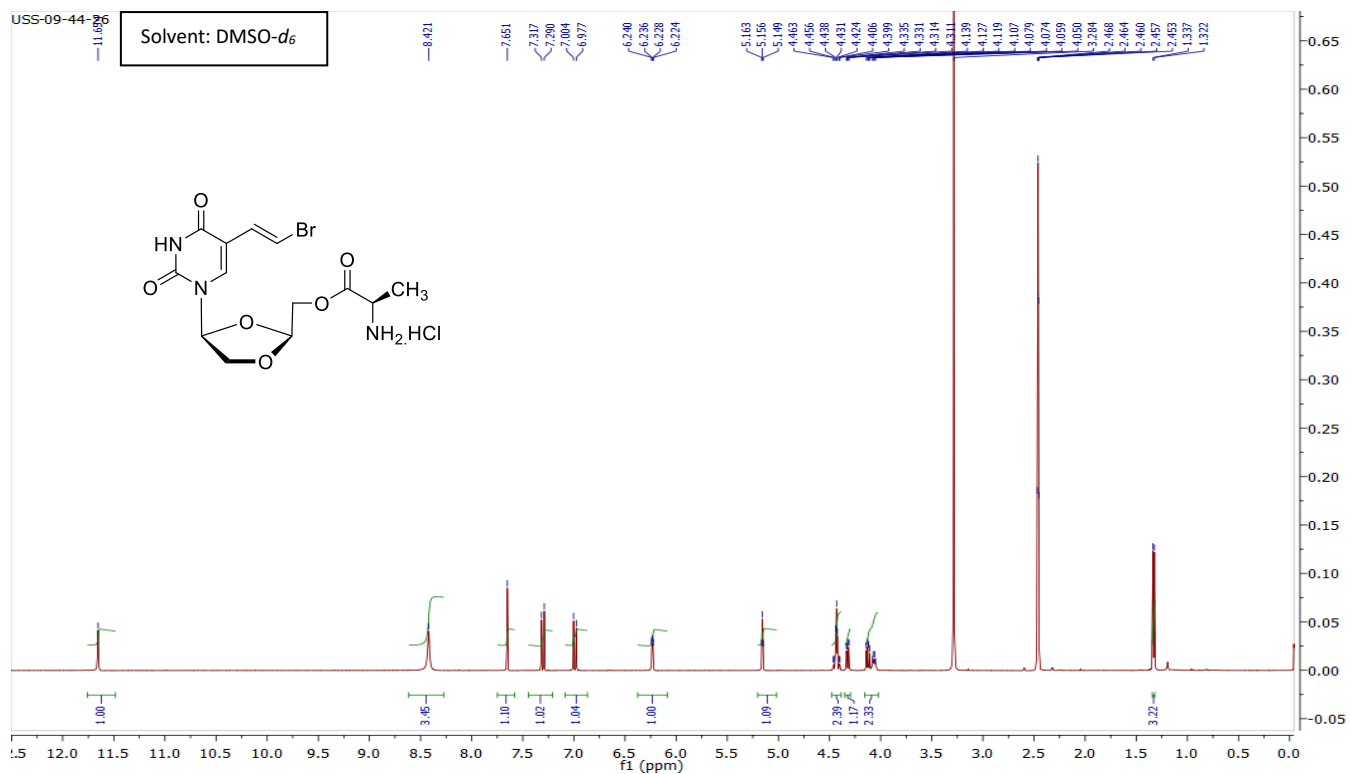

<sup>1</sup>H NMR of L-BH DU-5'-O-L-alanyl ester hydrochloride (15)

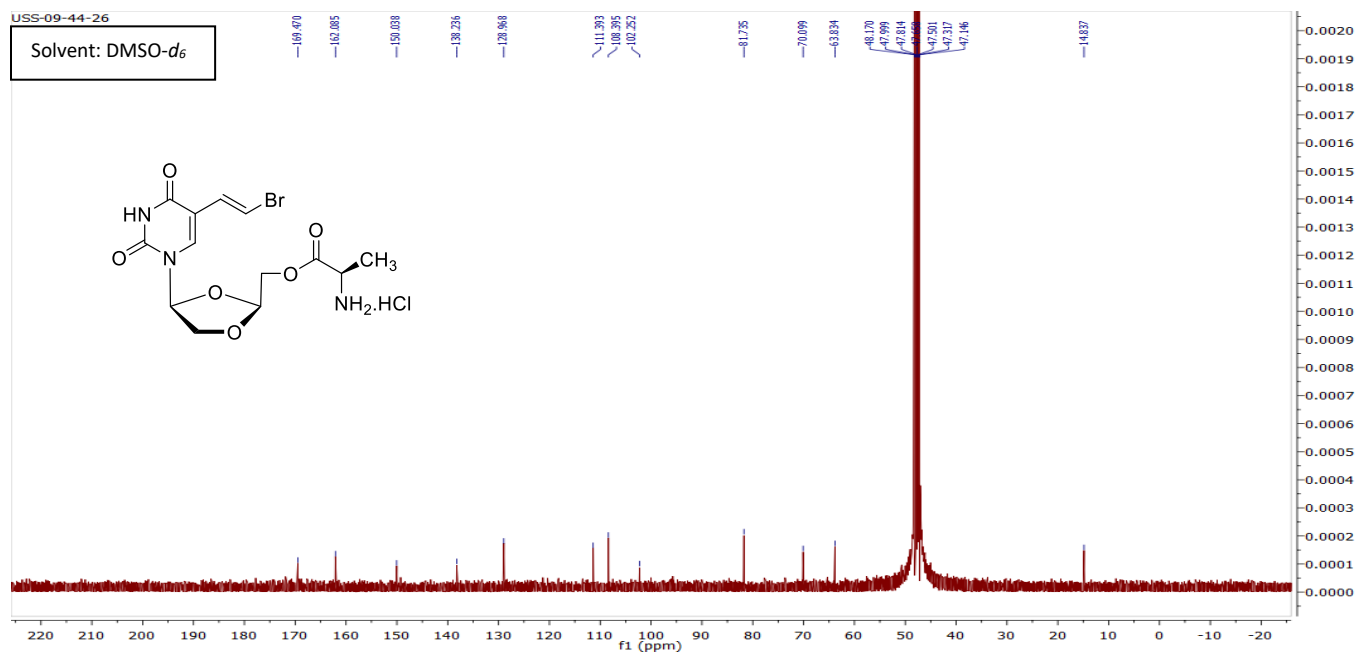

<sup>13</sup>C NMR of L-BH DU-5'-O-L-alanyl ester hydrochloride (15)

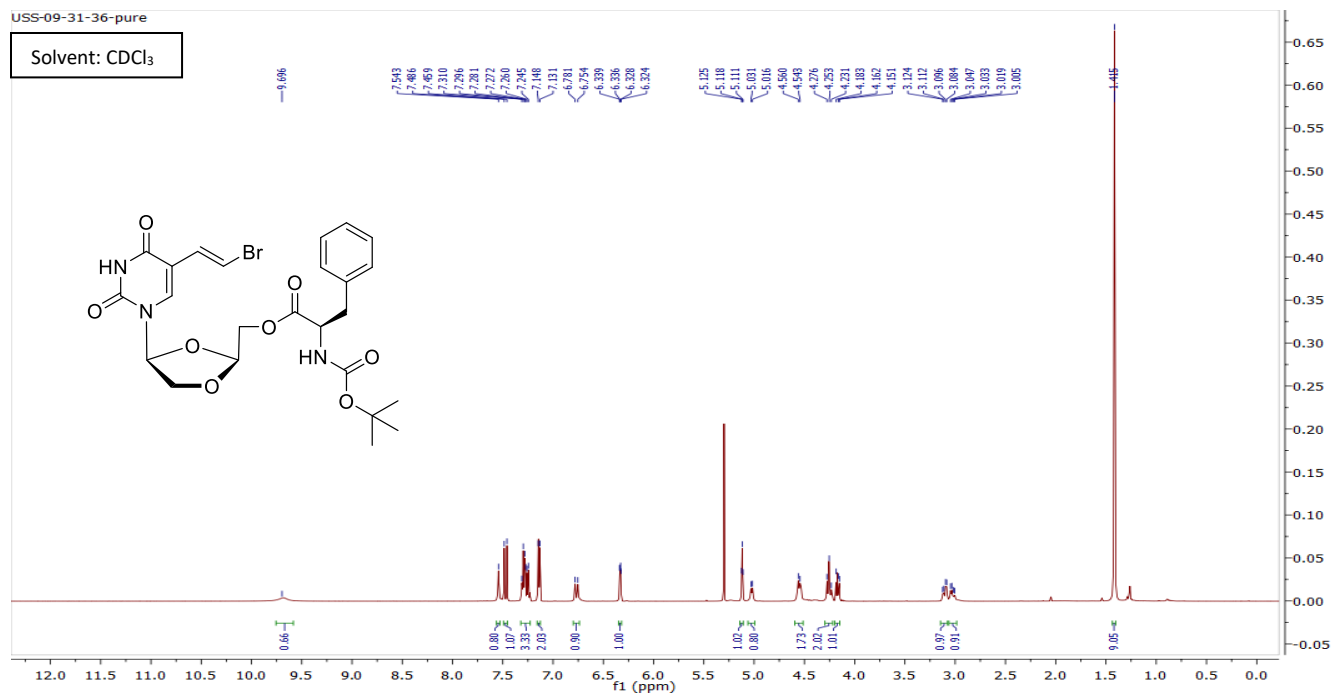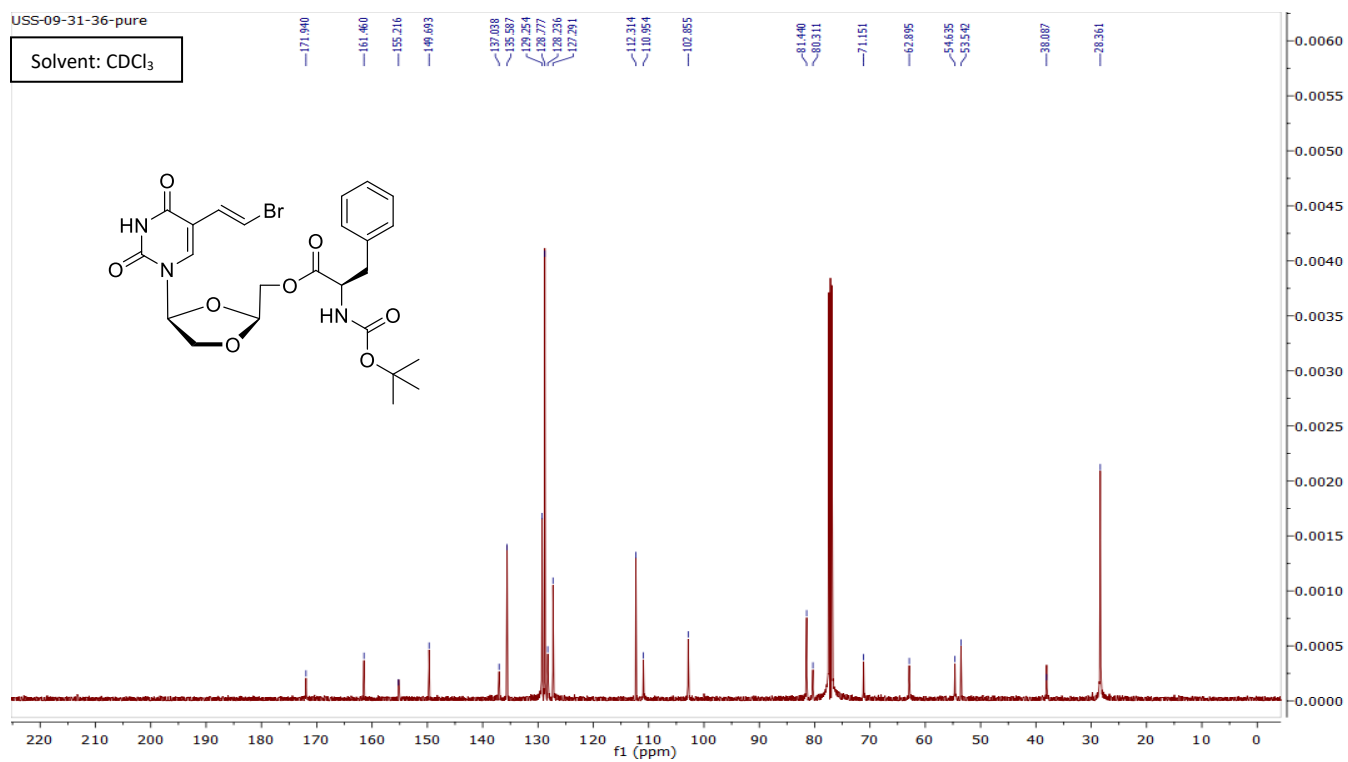

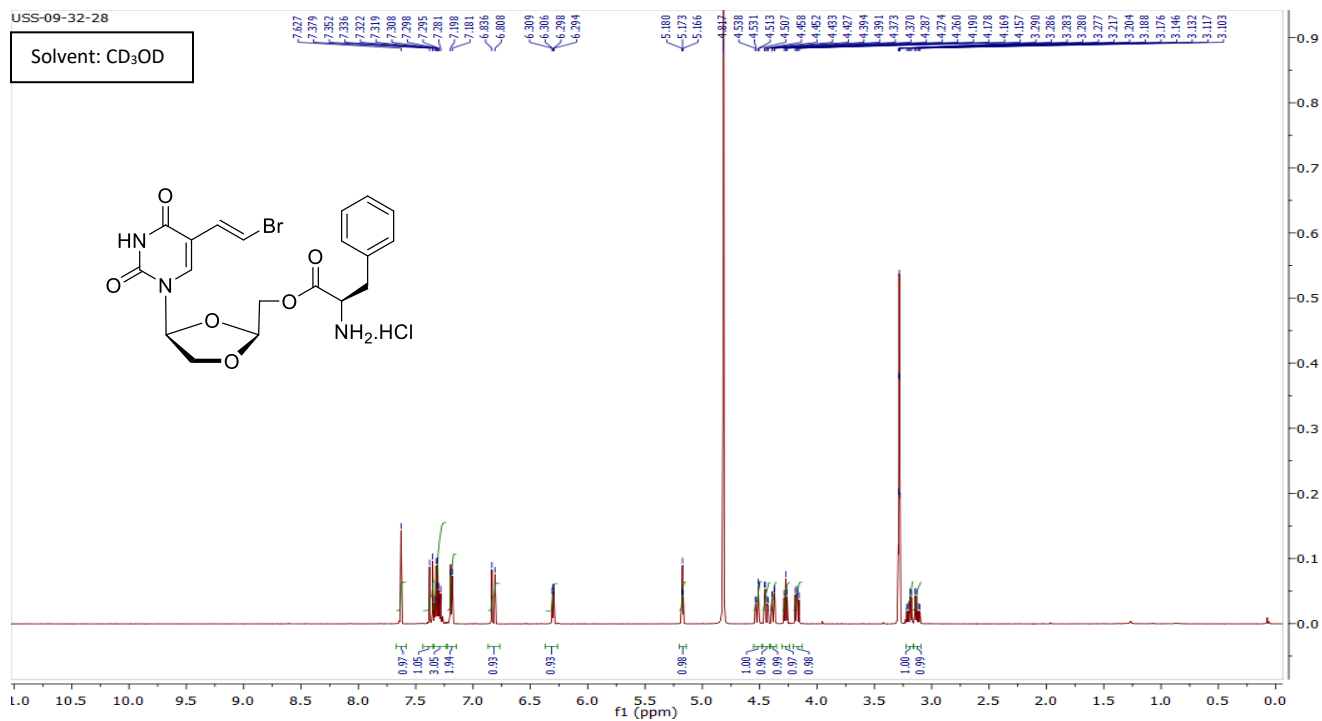

$^1\text{H}$  NMR of L-BH DU-5'-O-L-phenylalanyl ester hydrochloride (16)

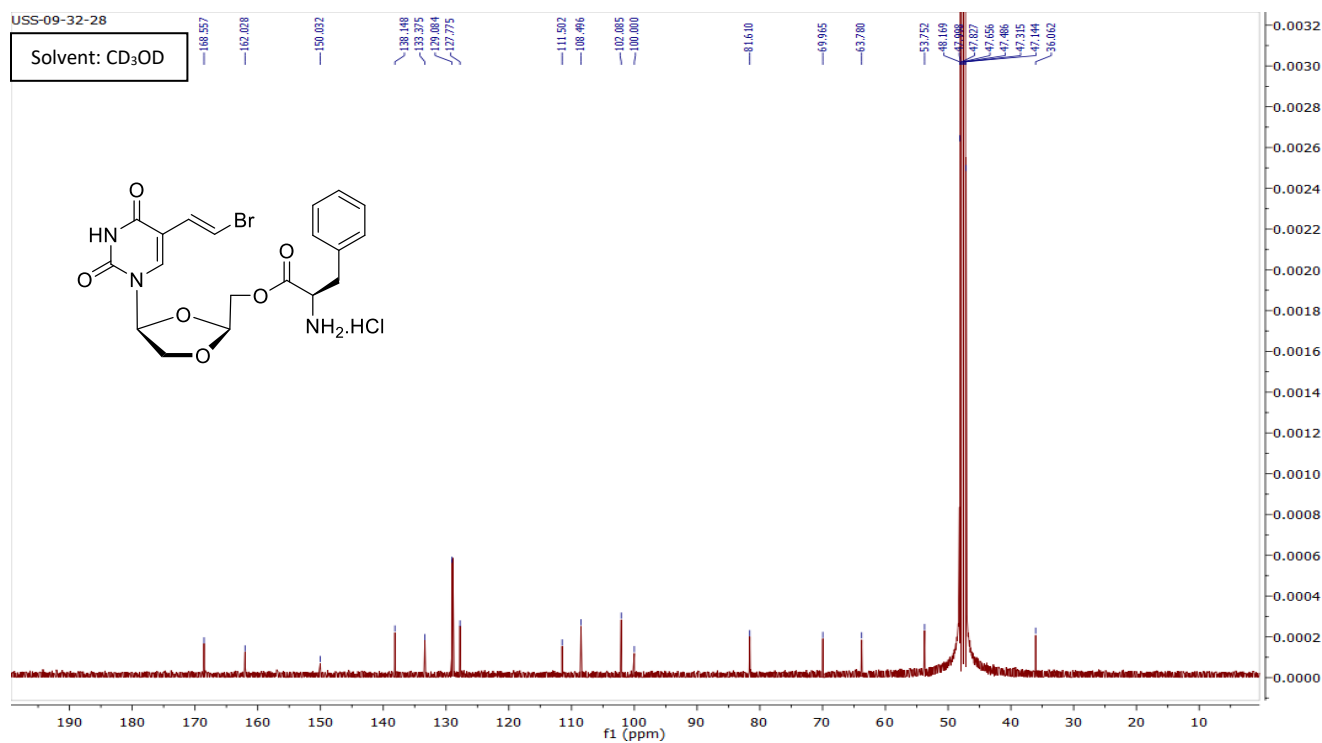

$^{13}\text{C}$  NMR of L-BH DU-5'-O-L-phenylalanyl ester hydrochloride (16)

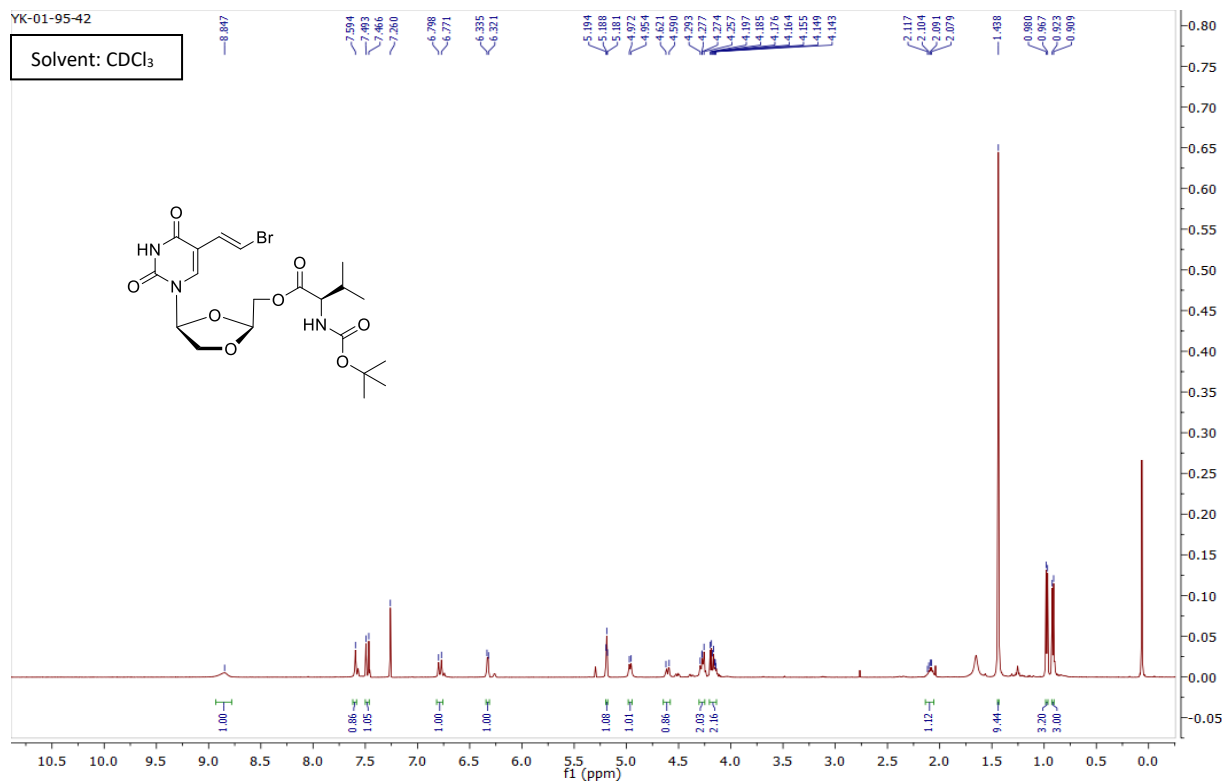

<sup>1</sup>H NMR of L-BH DU-5'-O-L-Boc-valine ester (5)

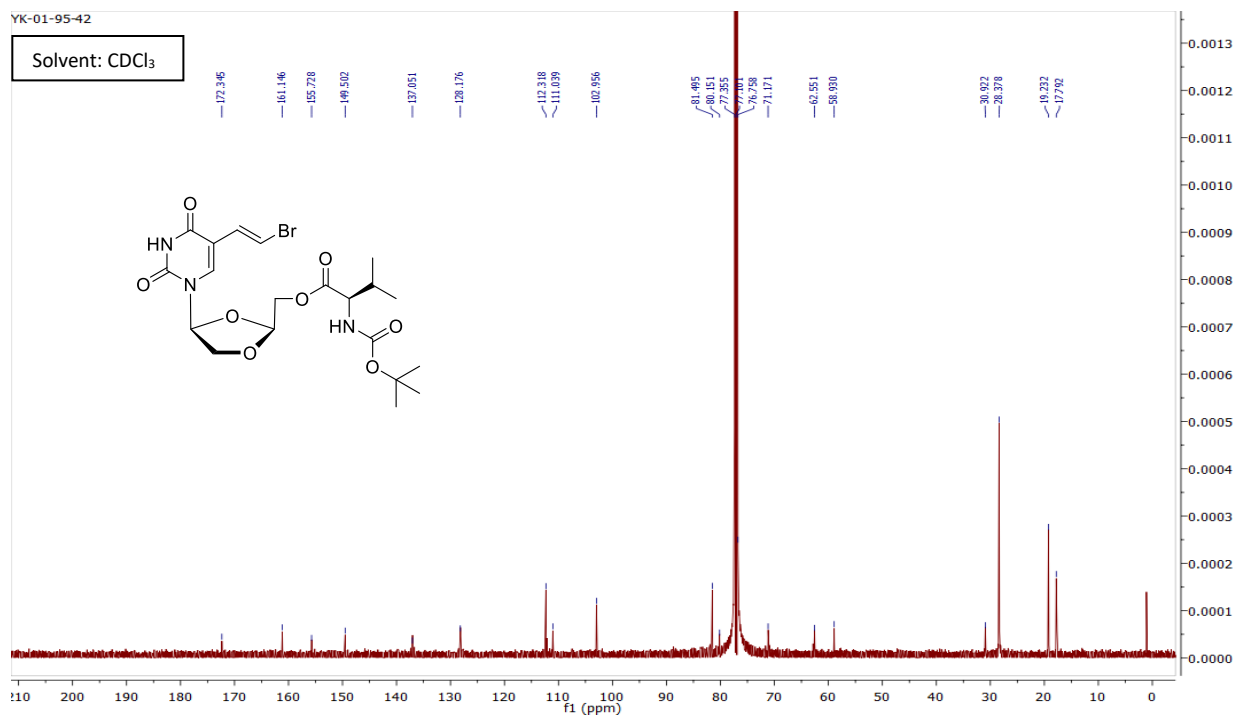

<sup>13</sup>C NMR of L-BH DU-5'-O-L-Boc-valine ester (5)



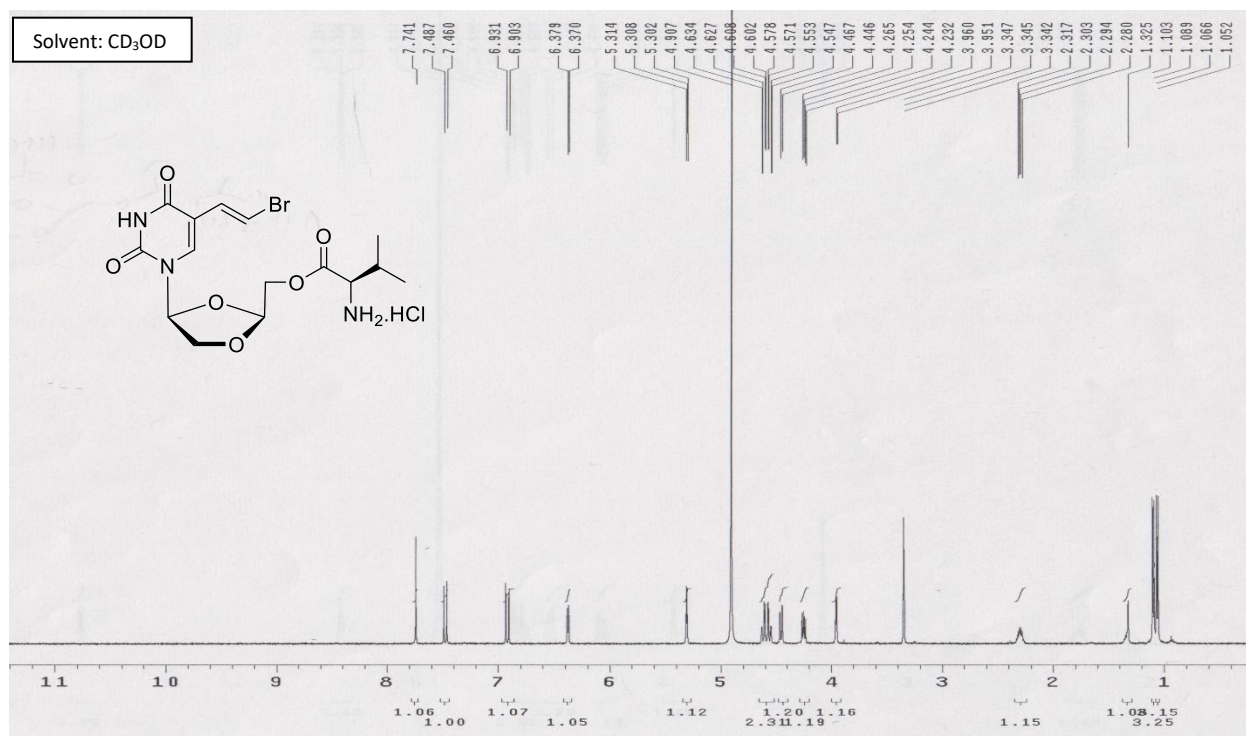

<sup>1</sup>H NMR of L-BH DU-5'-O-L-valyl ester hydrochloride (17)

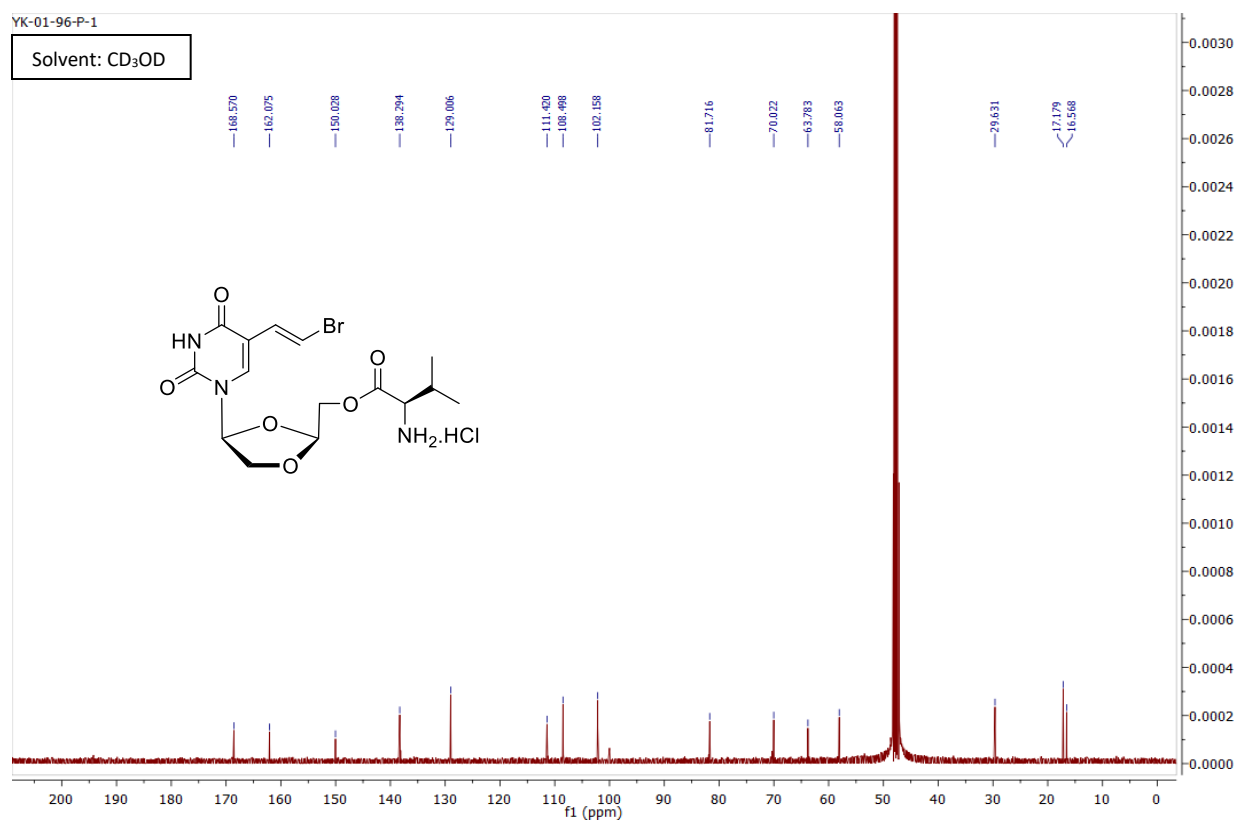

<sup>13</sup>C NMR of L-BH DU-5'-O-L-valyl ester hydrochloride (17)

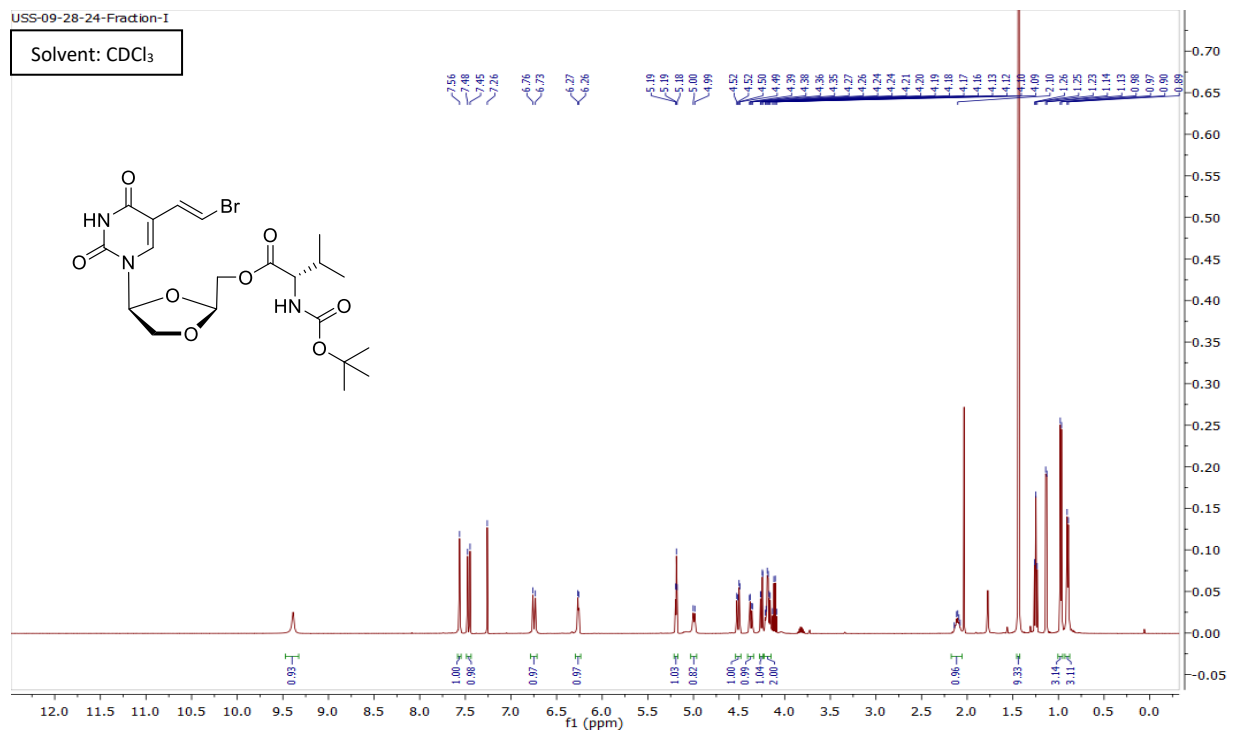

<sup>1</sup>H NMR of L-BH DU-5'-O-D-Boc-valine ester (6)

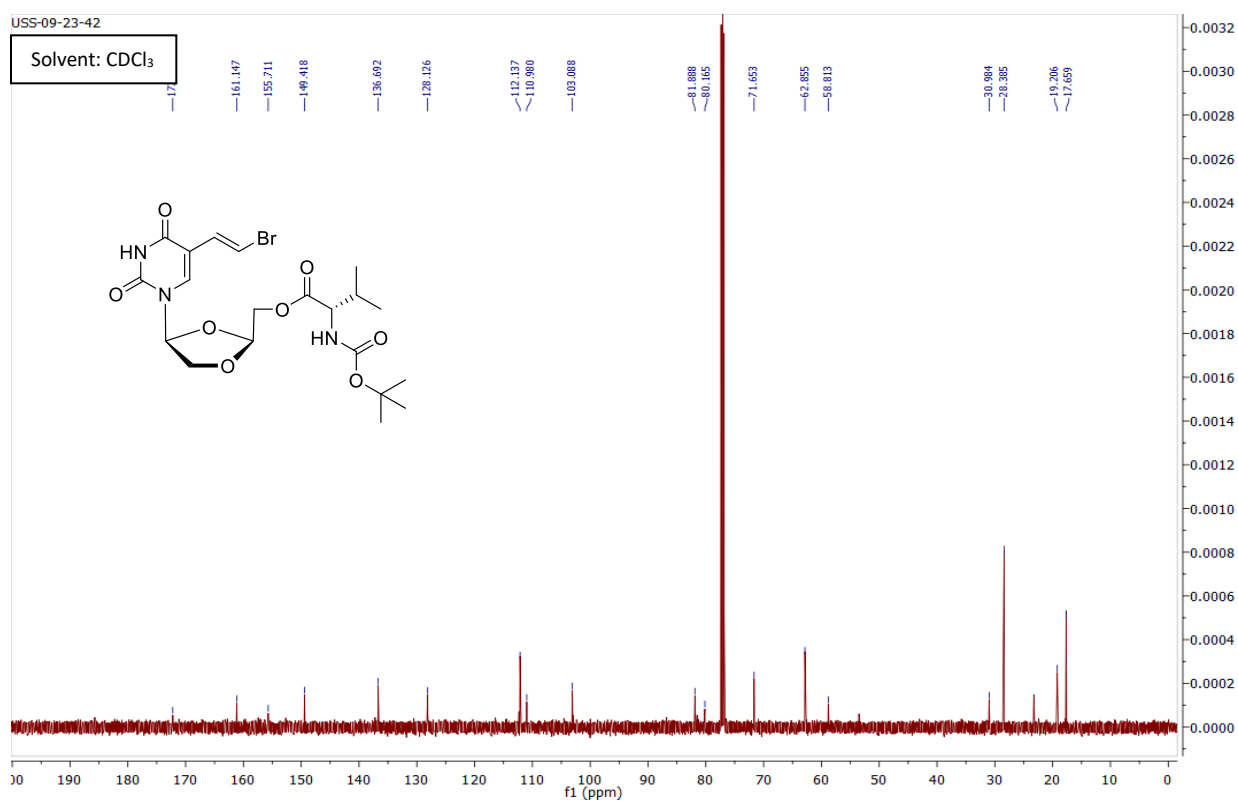

<sup>13</sup>C NMR of L-BH DU-5'-O-D-Boc-valine ester (6)

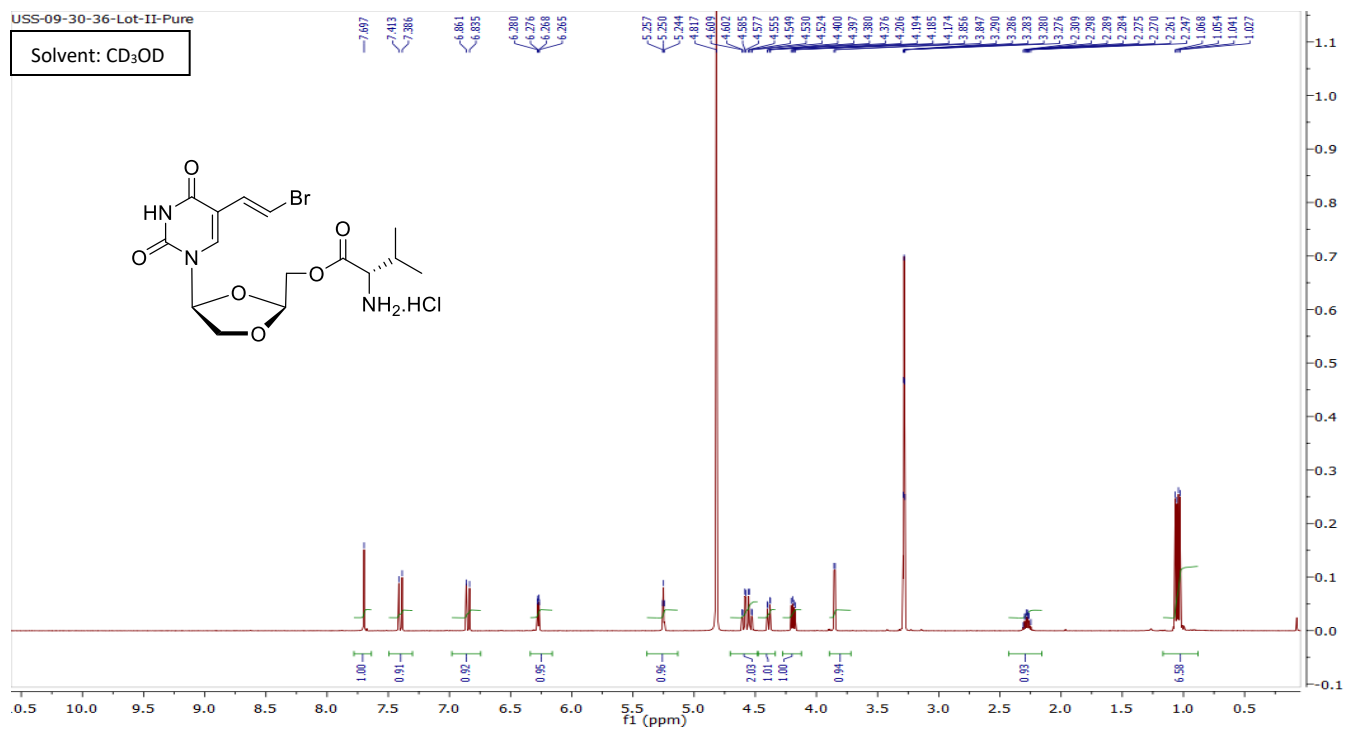

<sup>1</sup>H NMR of L-BH DU-5'-O-D-valyl ester hydrochloride (18)

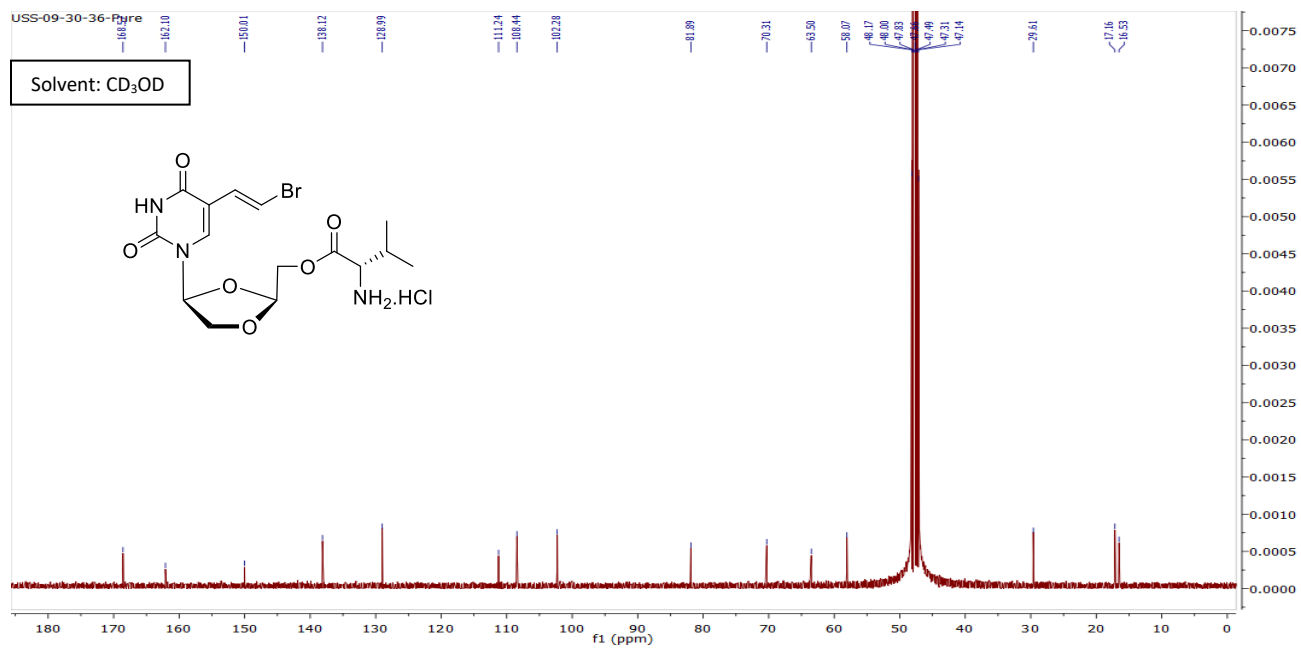

<sup>13</sup>C NMR of L-BH DU-5'-O-D-valyl ester hydrochloride (18)

USS-09-45-24

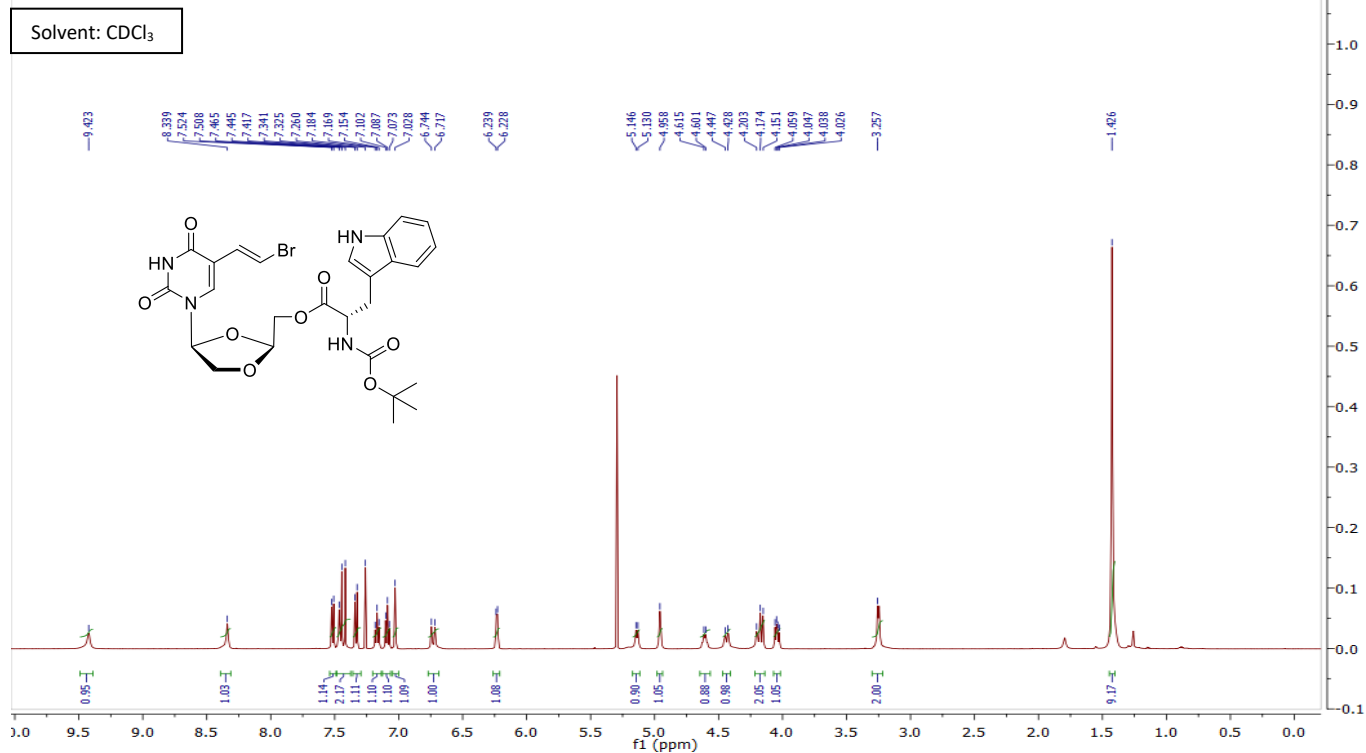

<sup>1</sup>H NMR of L-BH DU-5'-O-L-Boc-tryptophan ester (7)

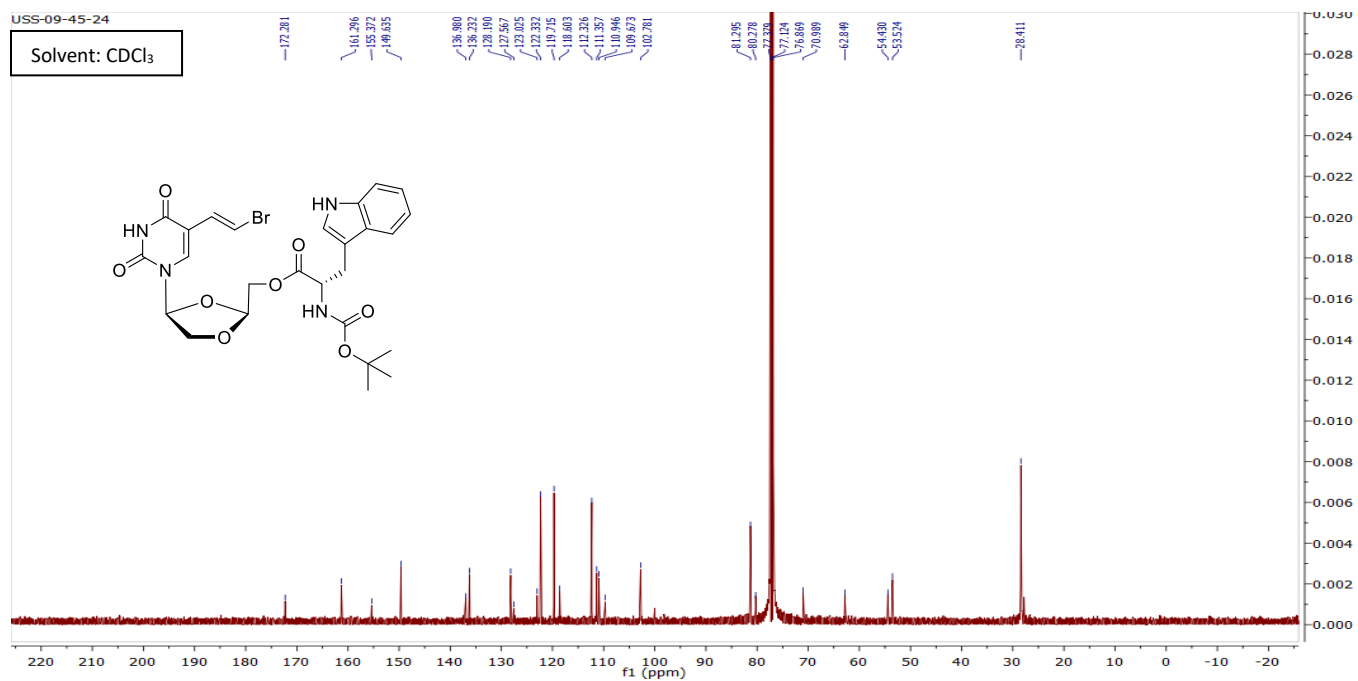

<sup>13</sup>C NMR of L-BH DU-5'-O-L-Boc-tryptophan ester (7)

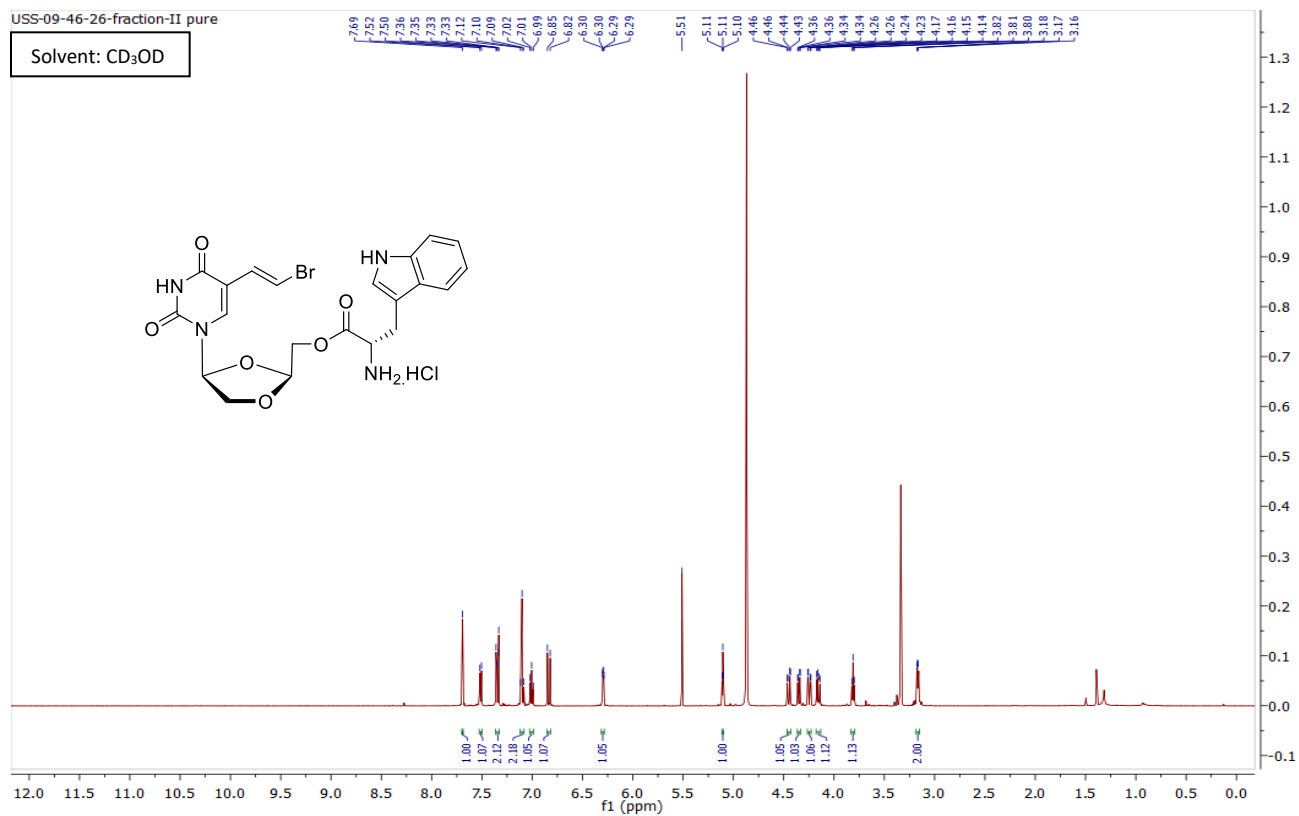

<sup>1</sup>H NMR of L-BH DU-5'-O-L-tryptophan ester hydrochloride (19)

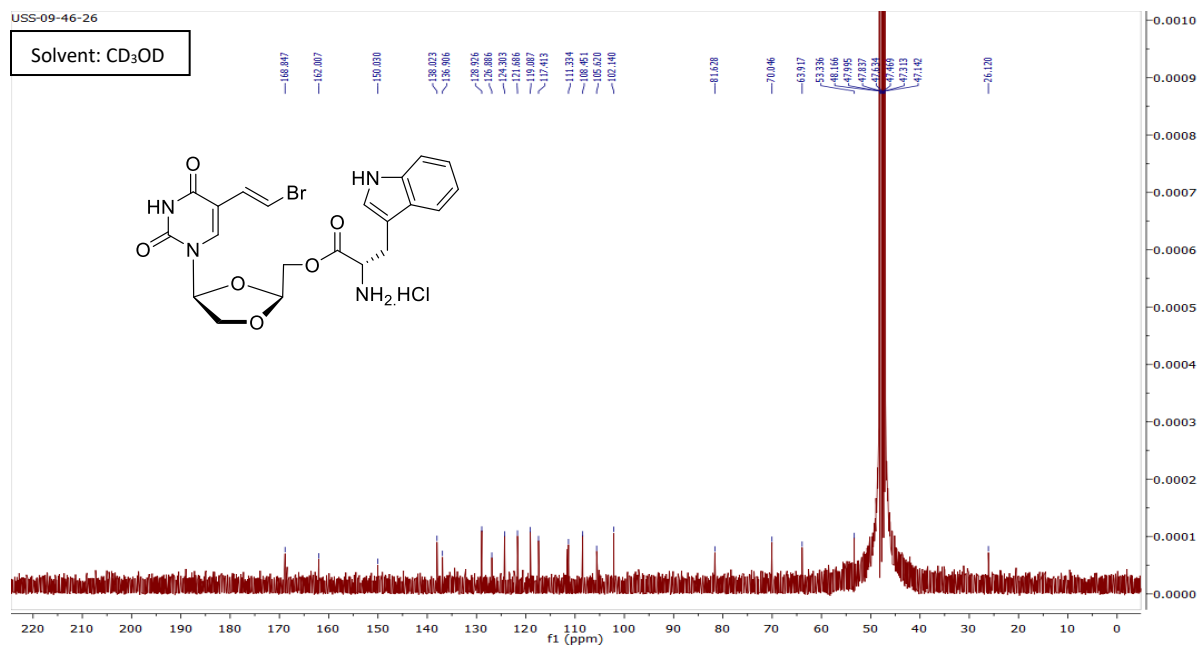

<sup>13</sup>C NMR of L-BH DU-5'-O-L-tryptophan ester hydrochloride (19)

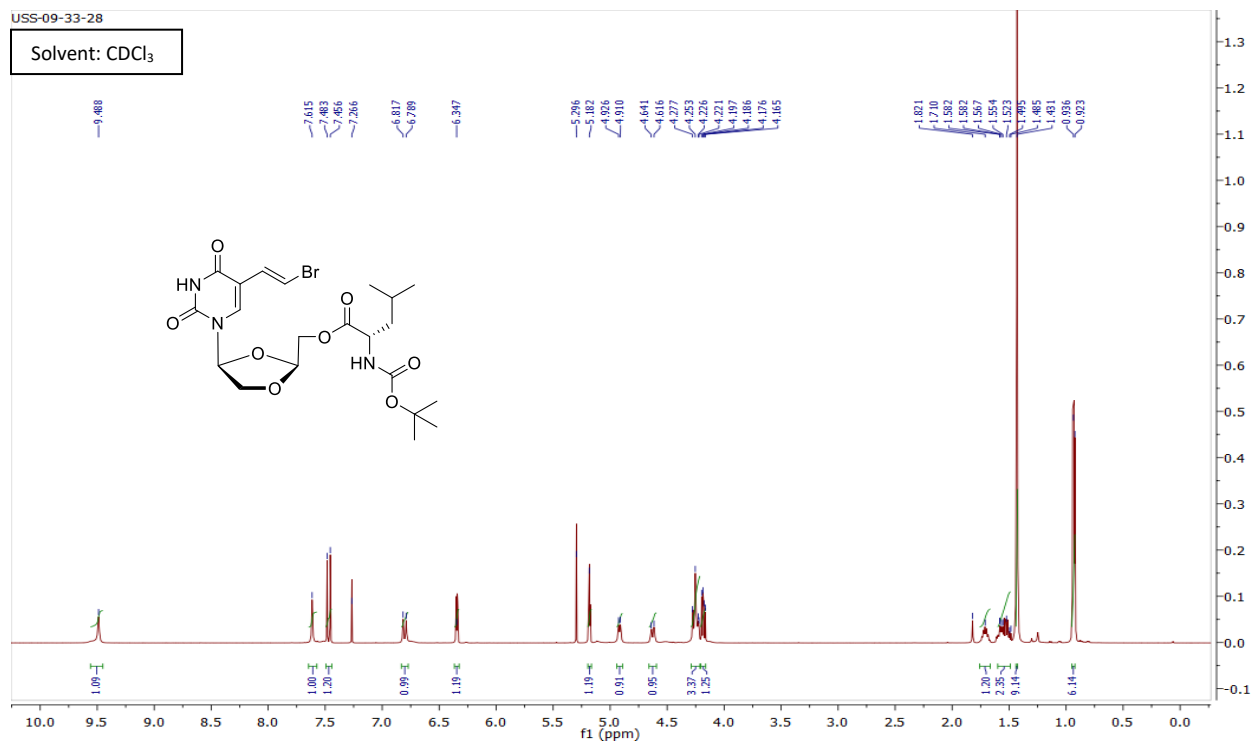

<sup>1</sup>H NMR of L-BH DU-5'-O-L-Boc-leucine ester (8)

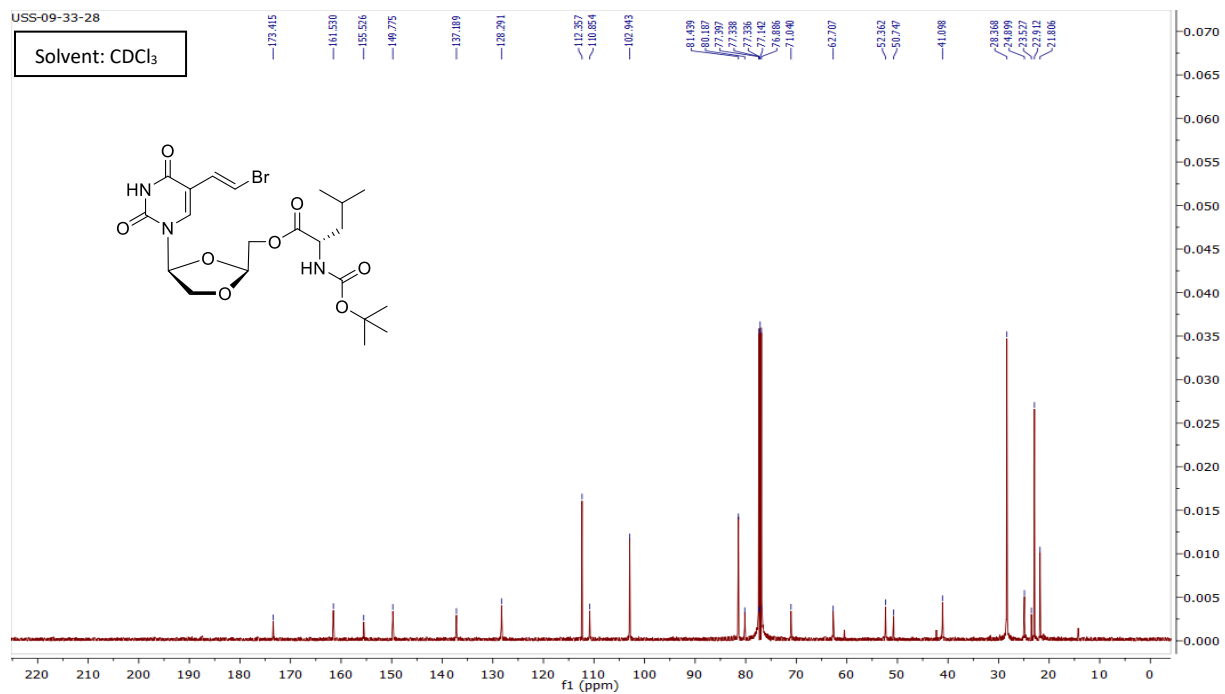

<sup>13</sup>C NMR of L-BH DU-5'-O-L-Boc-leucine ester (8)

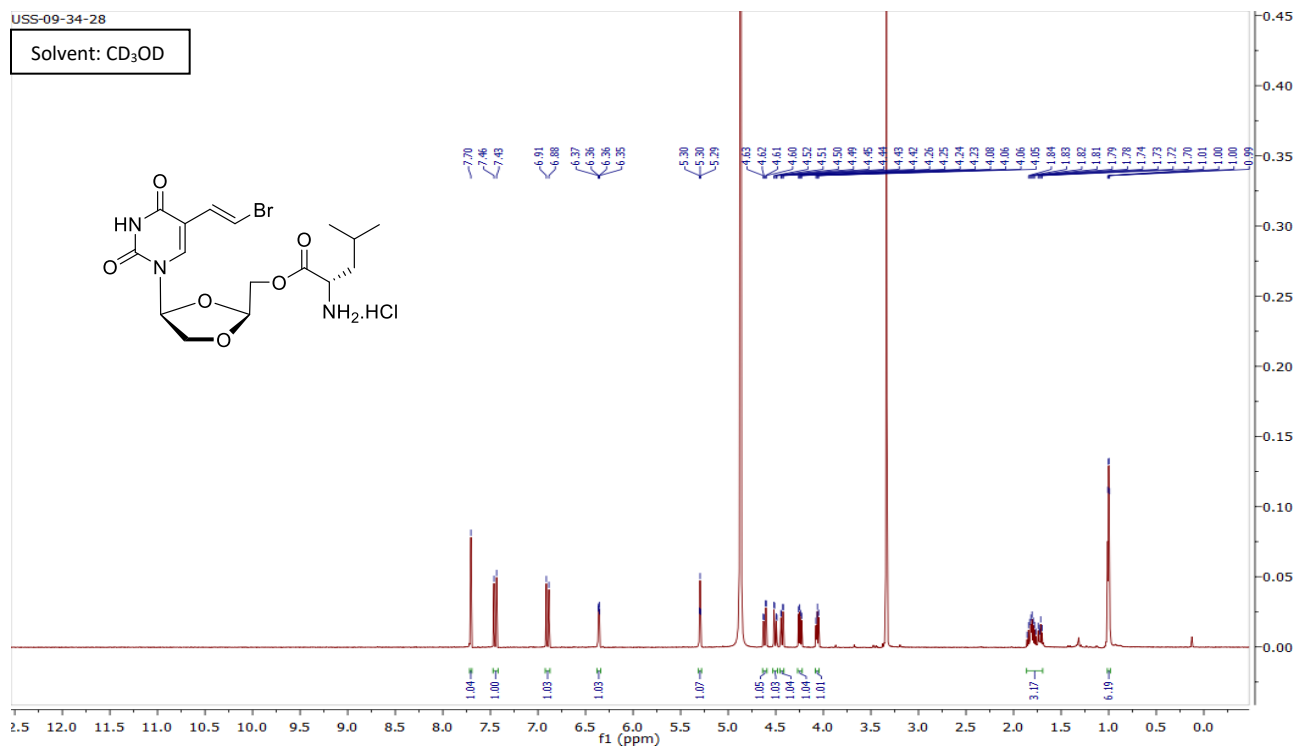

$^1\text{H}$  NMR of L-BH DU-5'-O-L-leucine ester hydrochloride (20)

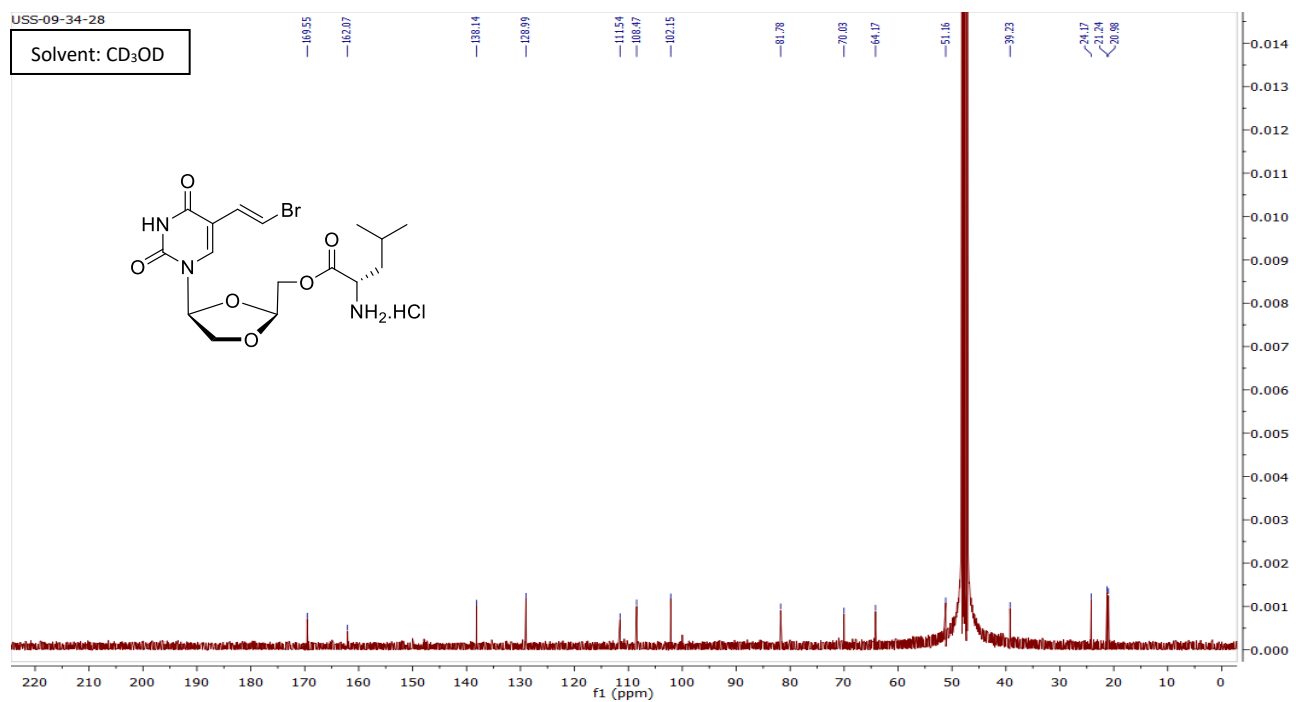

$^{13}\text{C}$  NMR of L-BH DU-5'-O-L-leucine ester hydrochloride (20)

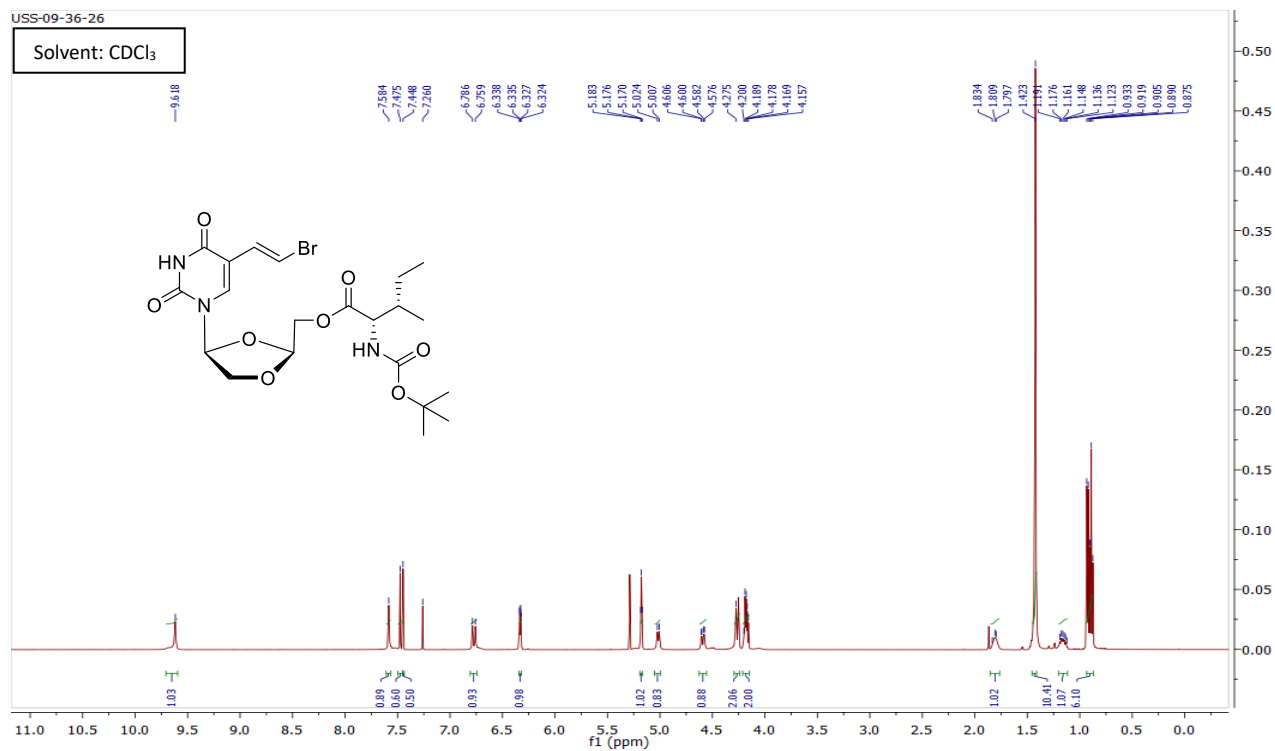

<sup>1</sup>H NMR of L-BH DU-5'-O-L-Boc-iso-leucine ester (9)

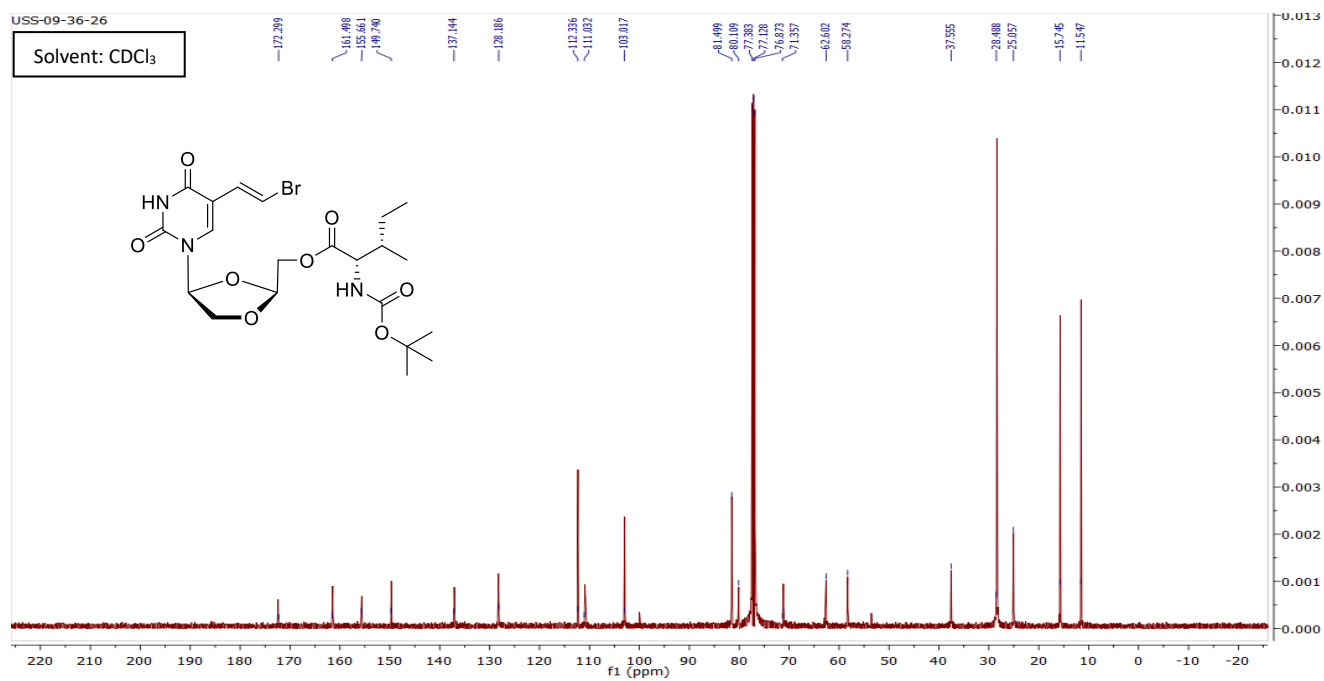

<sup>13</sup>C NMR of L-BH DU-5'-O-L-Boc-iso-leucine ester (9)



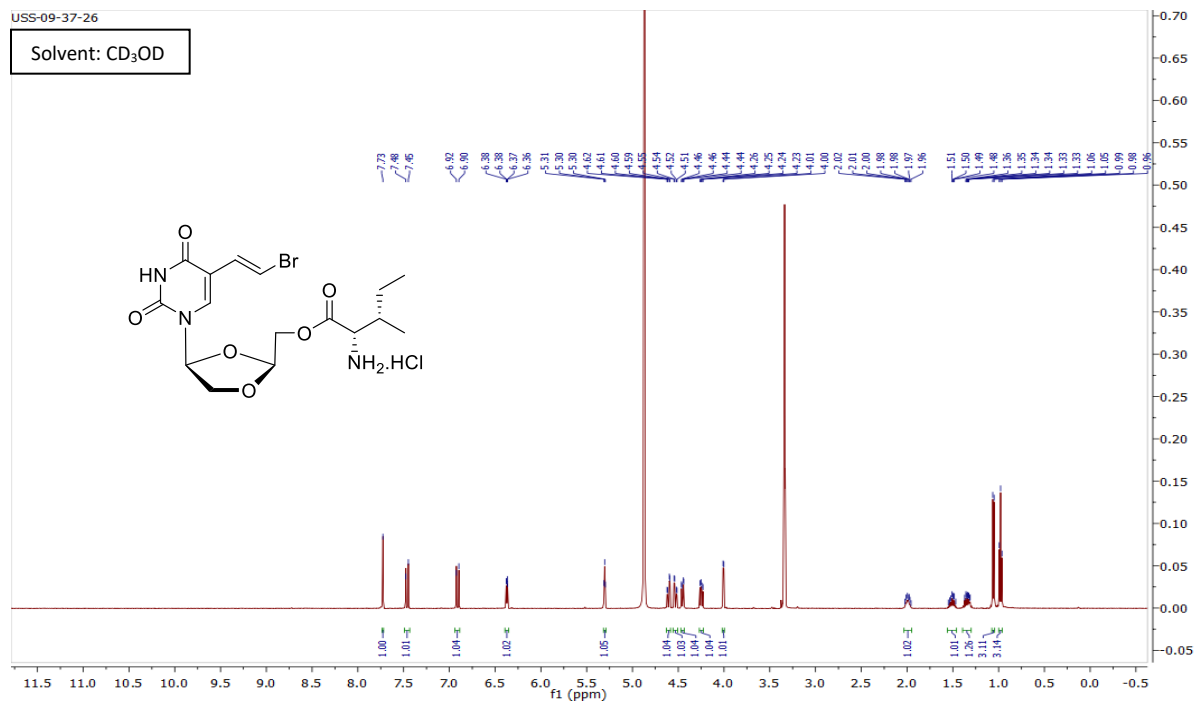

<sup>1</sup>H NMR of L-BH DU-5'-O-L-iso-leucine ester hydrochloride (21)

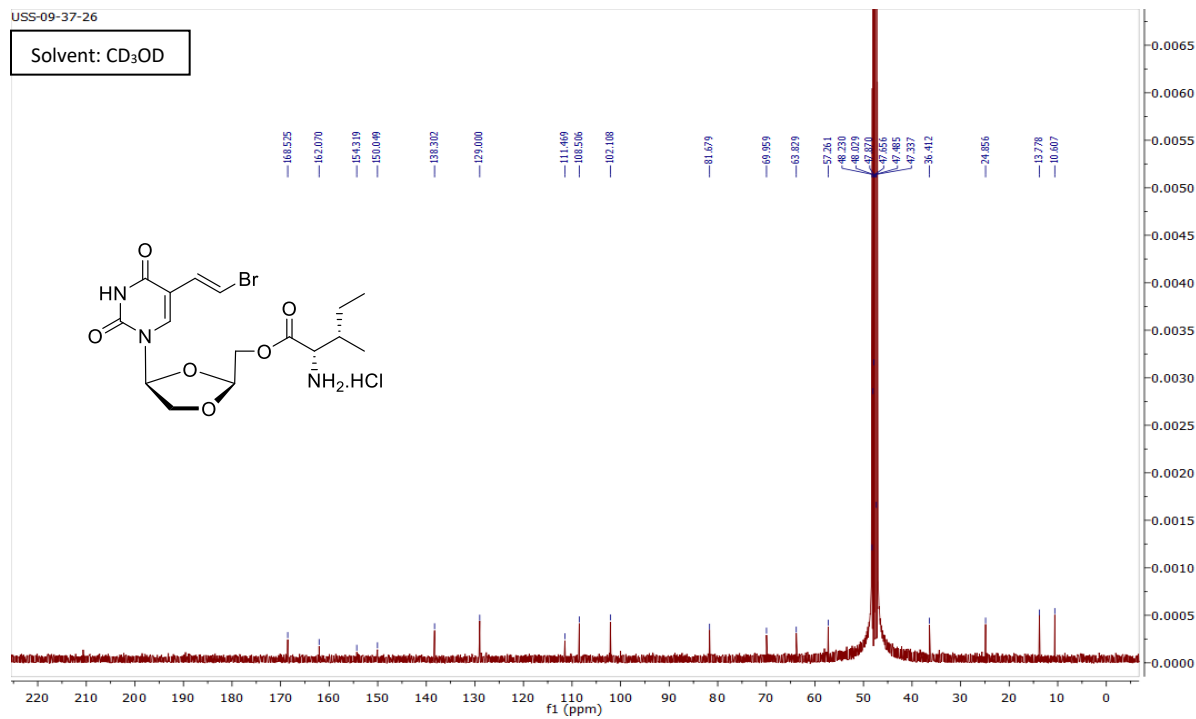

<sup>13</sup>C NMR of L-BH DU-5'-O-L-iso-leucine ester hydrochloride (21)

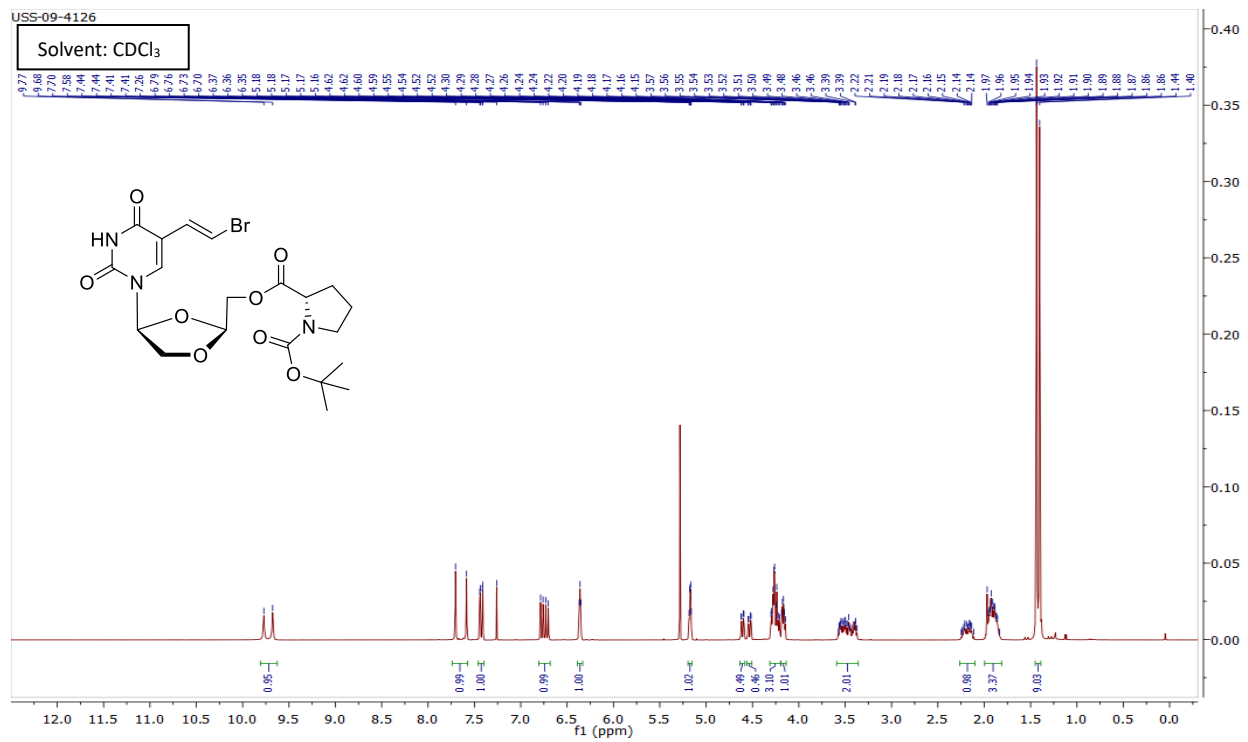

<sup>1</sup>H NMR of L-BH DU-5'-O-L-Boc-proline ester (10)

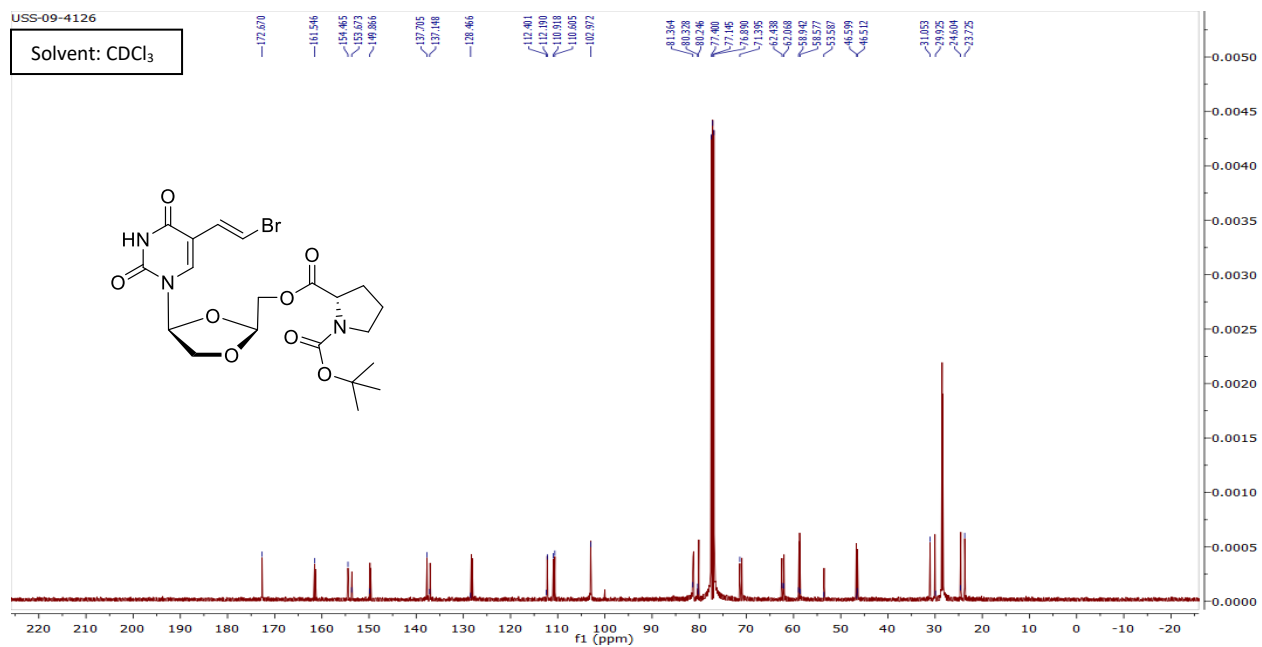

<sup>13</sup>C NMR of L-BH DU-5'-O-L-Boc-proline ester (10)

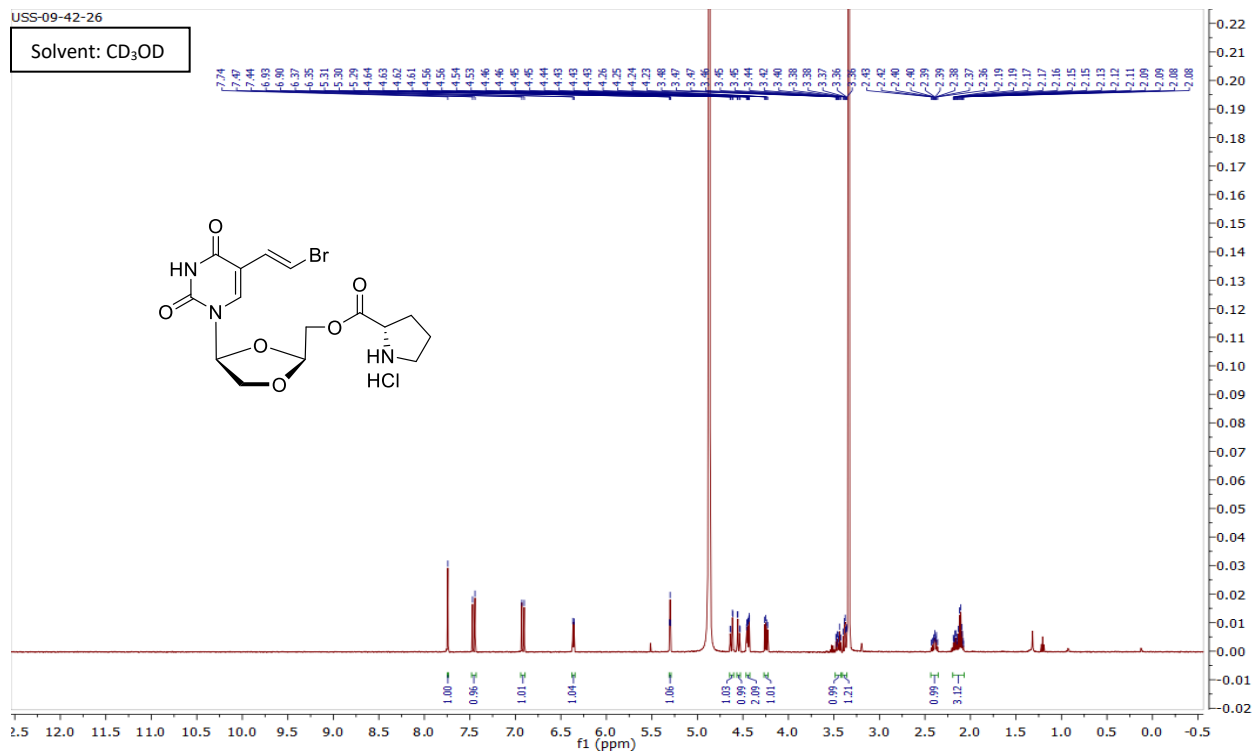

<sup>1</sup>H NMR of L-BH DU-5'-O-L-proline ester hydrochloride (22)

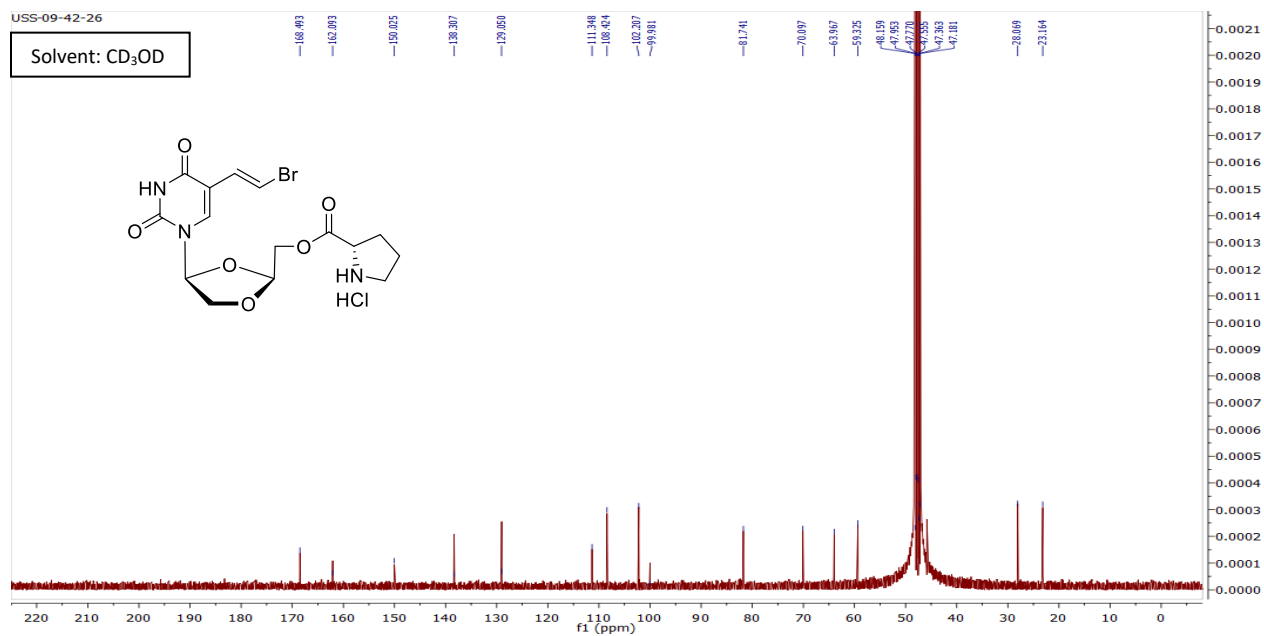

<sup>13</sup>C NMR of L-BH DU-5'-O-L-proline ester hydrochloride (22)

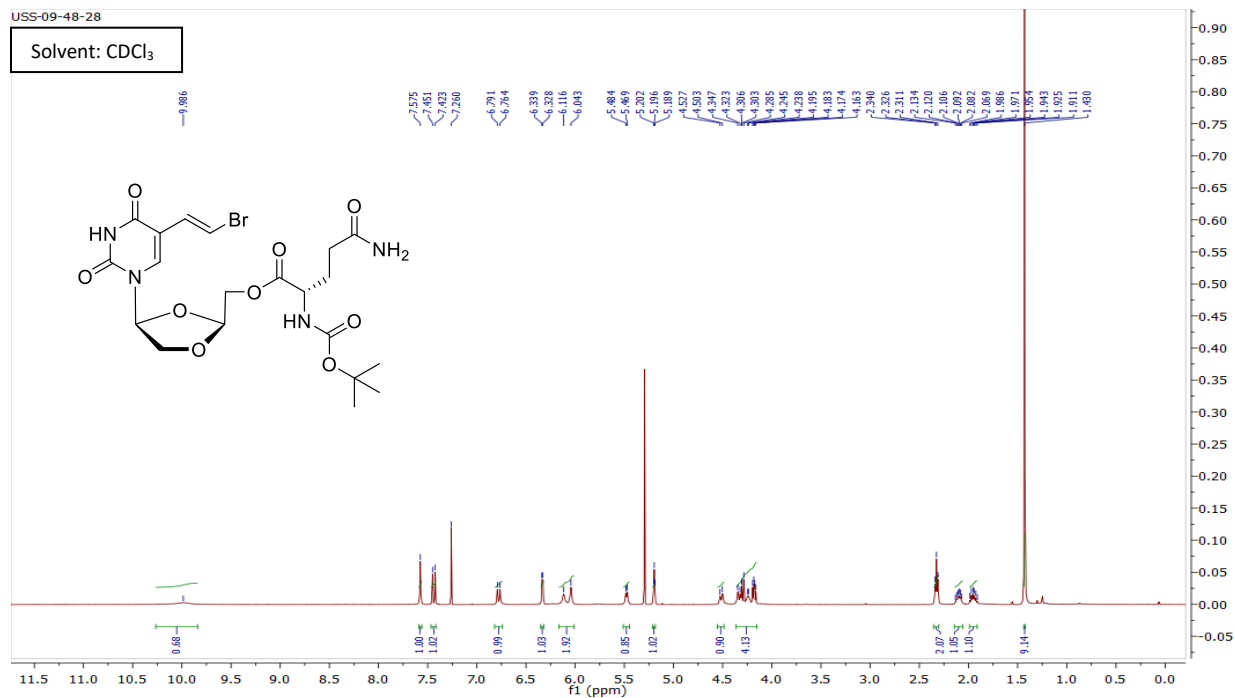

<sup>1</sup>H NMR of L-BH DU-5'-O-L-Boc-glutamine amide ester (11)

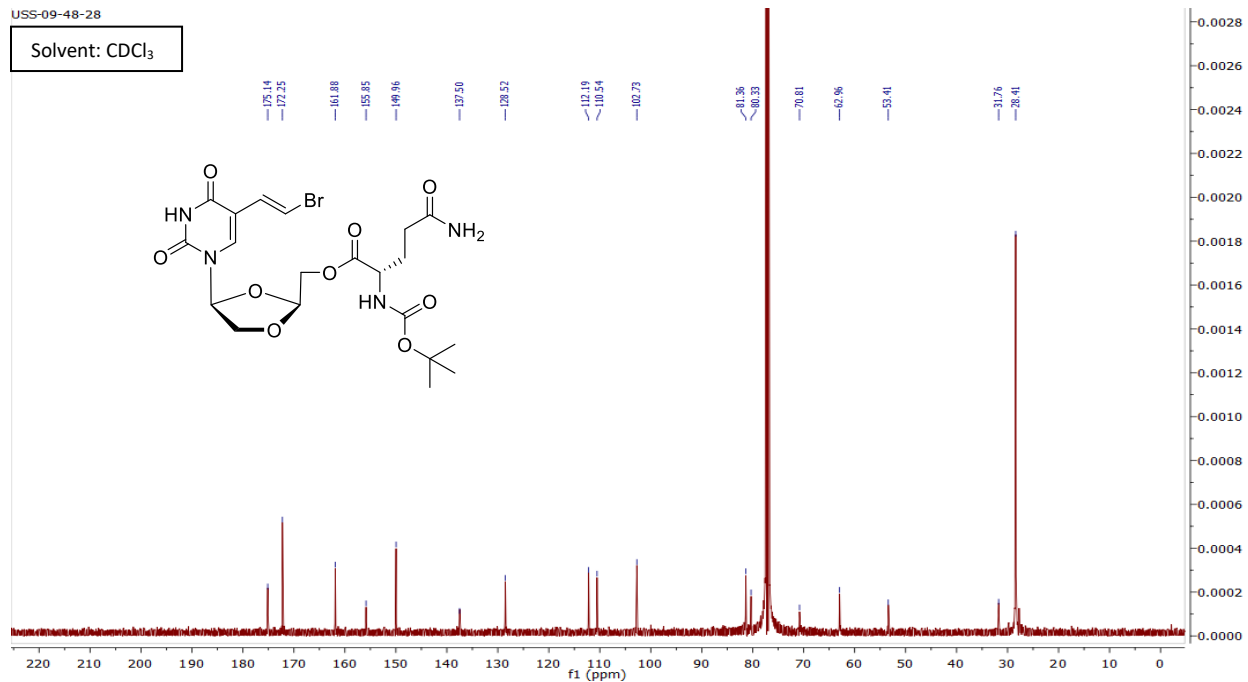

<sup>13</sup>C NMR of L-BH DU-5'-O-L-Boc-glutamine amide ester (11)

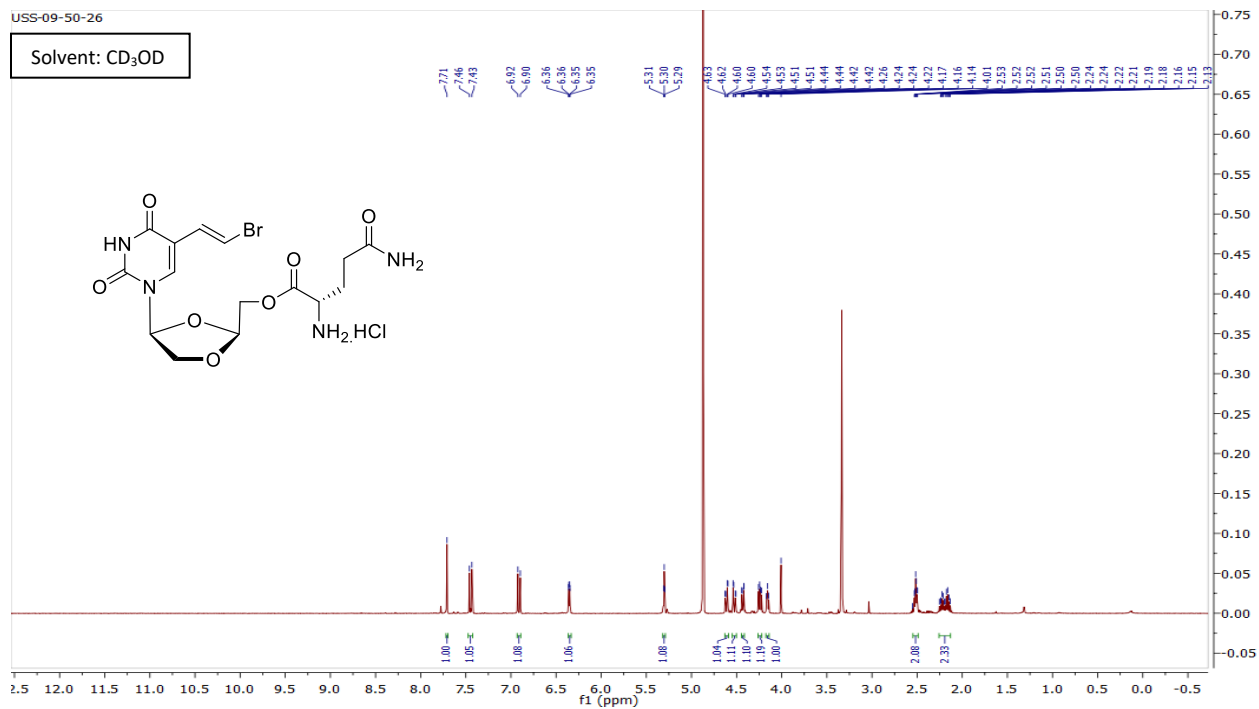

<sup>1</sup>H NMR of L-BH DU-5'-O-L-glutamine ester hydrochloride (**23**)

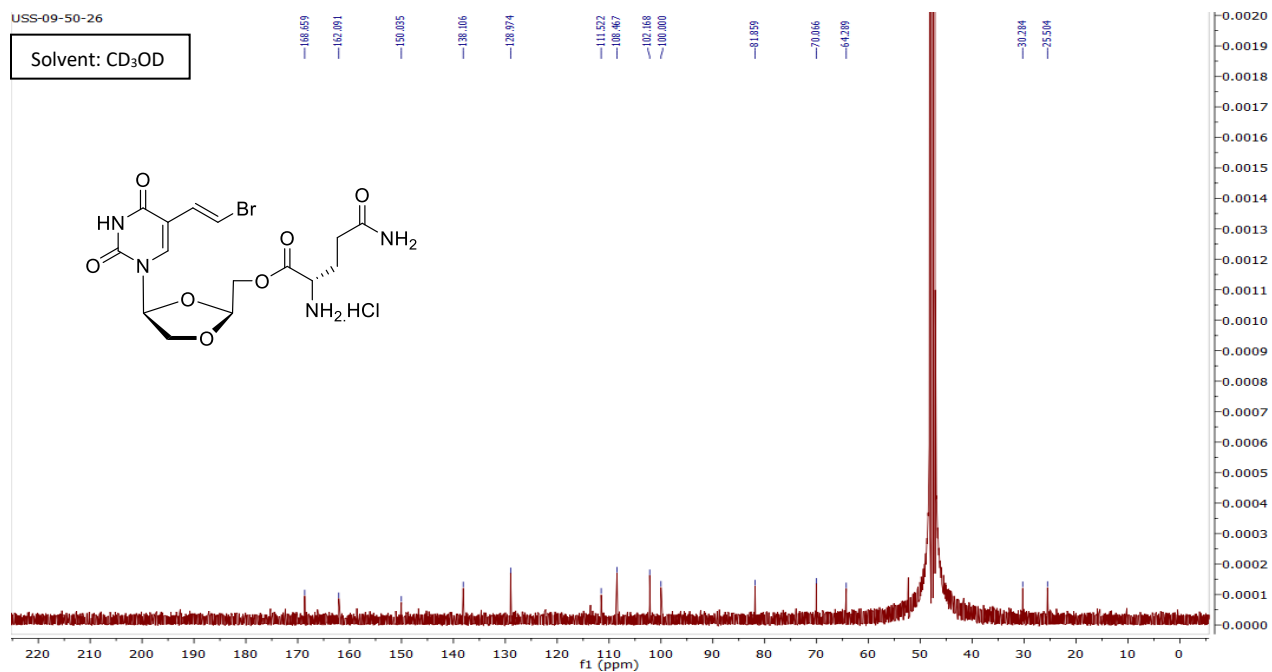

<sup>13</sup>C NMR of L-BH DU-5'-O-L-glutamine ester hydrochloride (**23**)

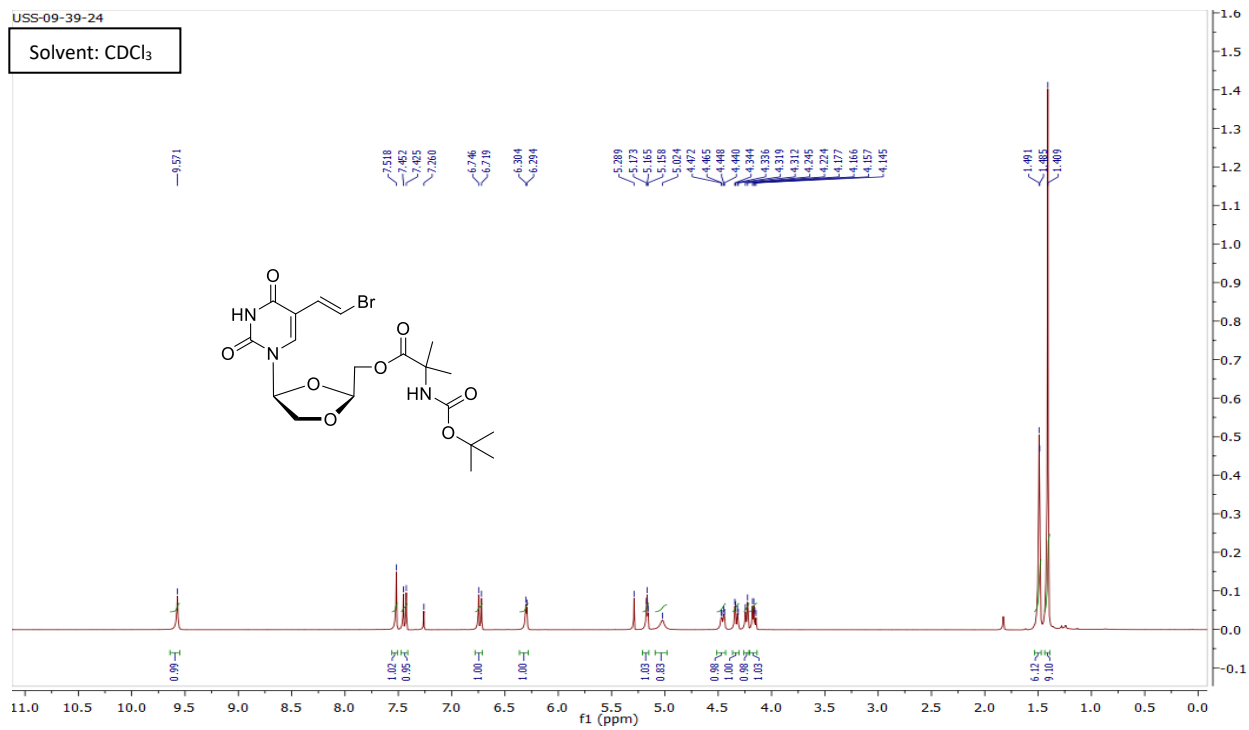

<sup>1</sup>H NMR of L-BH DU-5'-O-Boc-2-Aminoisobutyric ester (12)

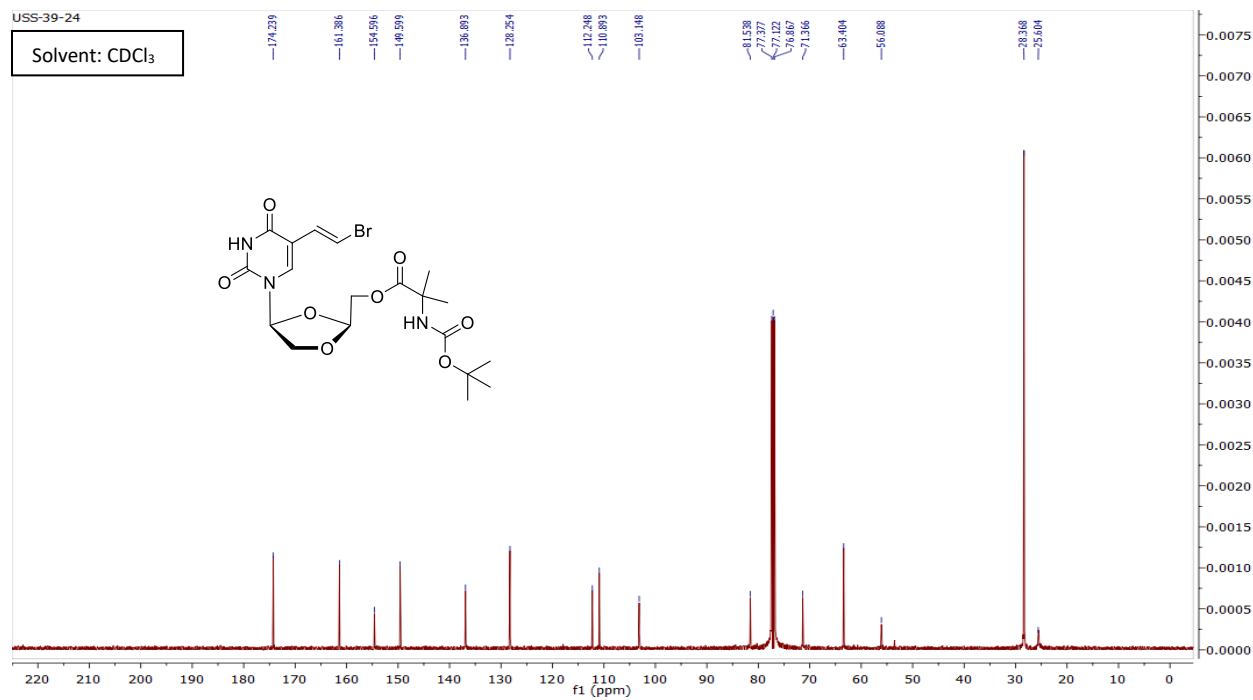

<sup>13</sup>C NMR of L-BH DU-5'-O-Boc-2-Aminoisobutyric ester (12)

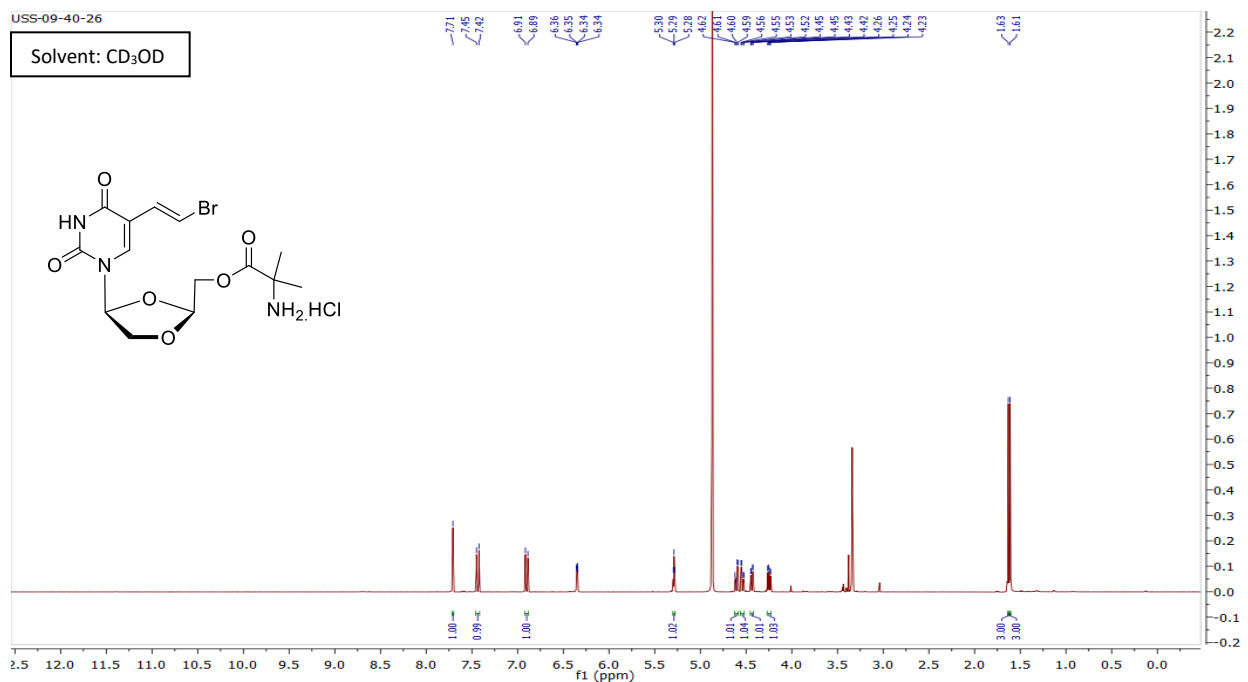

$^1\text{H}$  NMR of L-BHDU-5'-O-2-Aminoisobutyric acid ester hydrochloride (24)

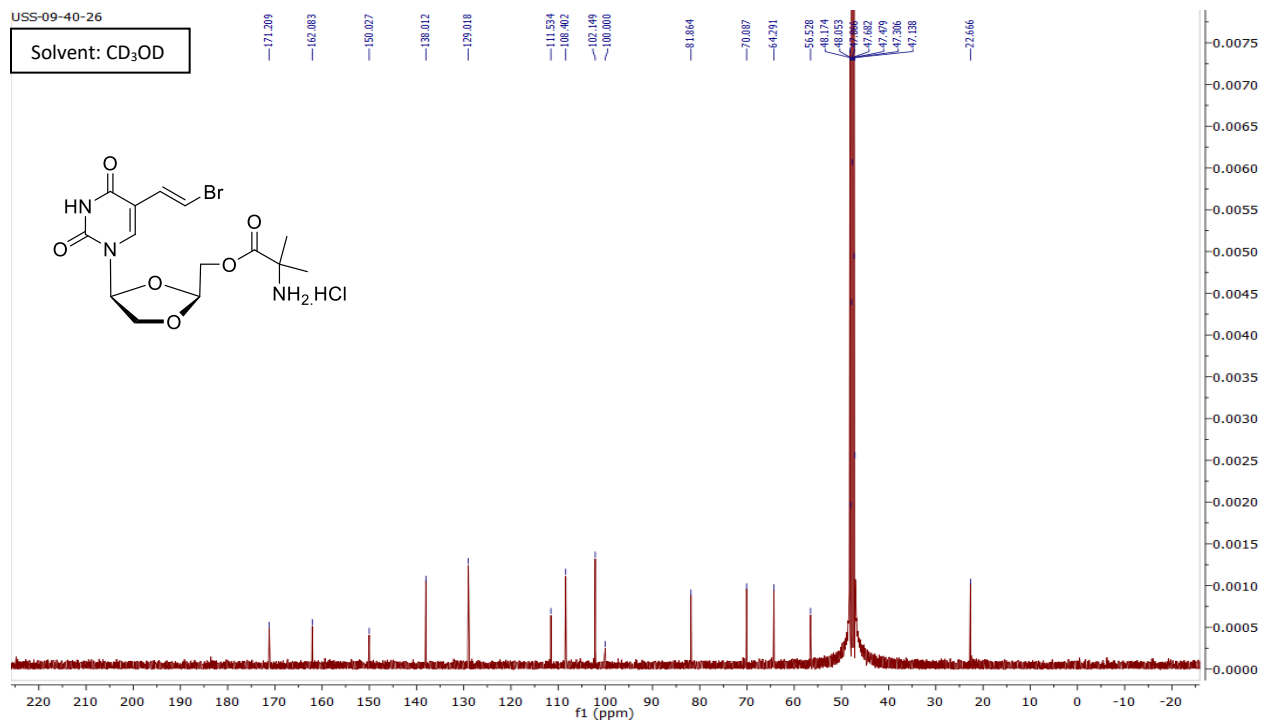

$^{13}\text{C}$  NMR of L-BHDU-5'-O-2-Aminoisobutyric acid ester hydrochloride (24)

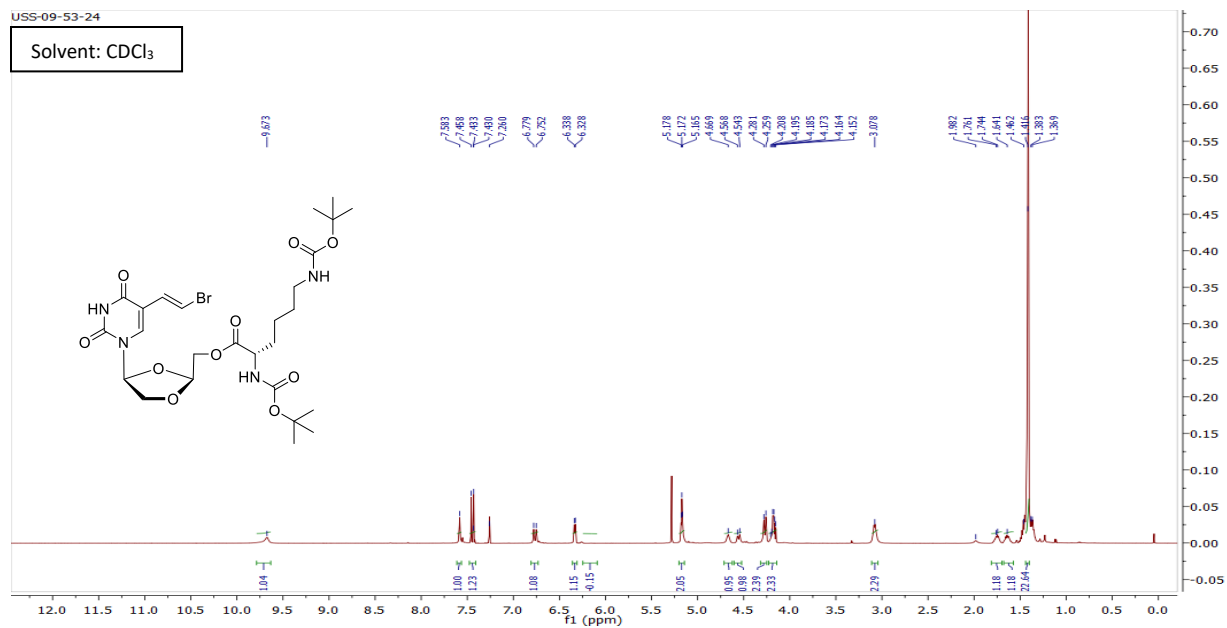

<sup>1</sup>H NMR of L-BH DU-5'-O-L-Boc-lysine Boc-amide ester (**13**)

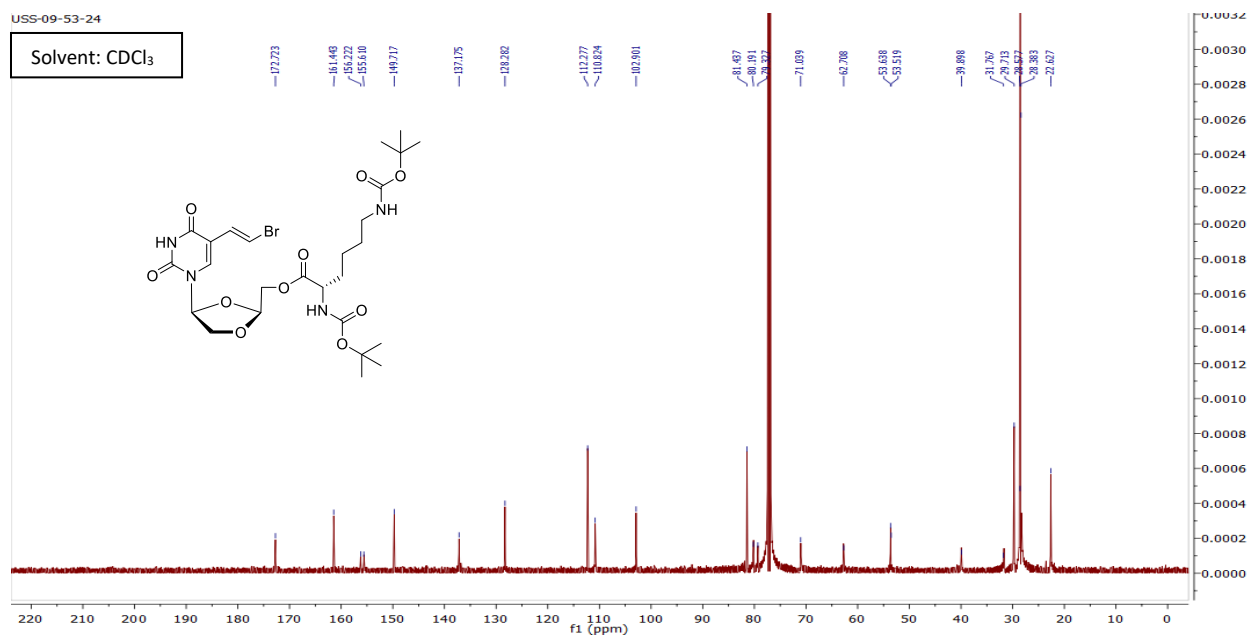

<sup>13</sup>C NMR of L-BH DU-5'-O-L-Boc-lysine Boc-amide ester (**13**)



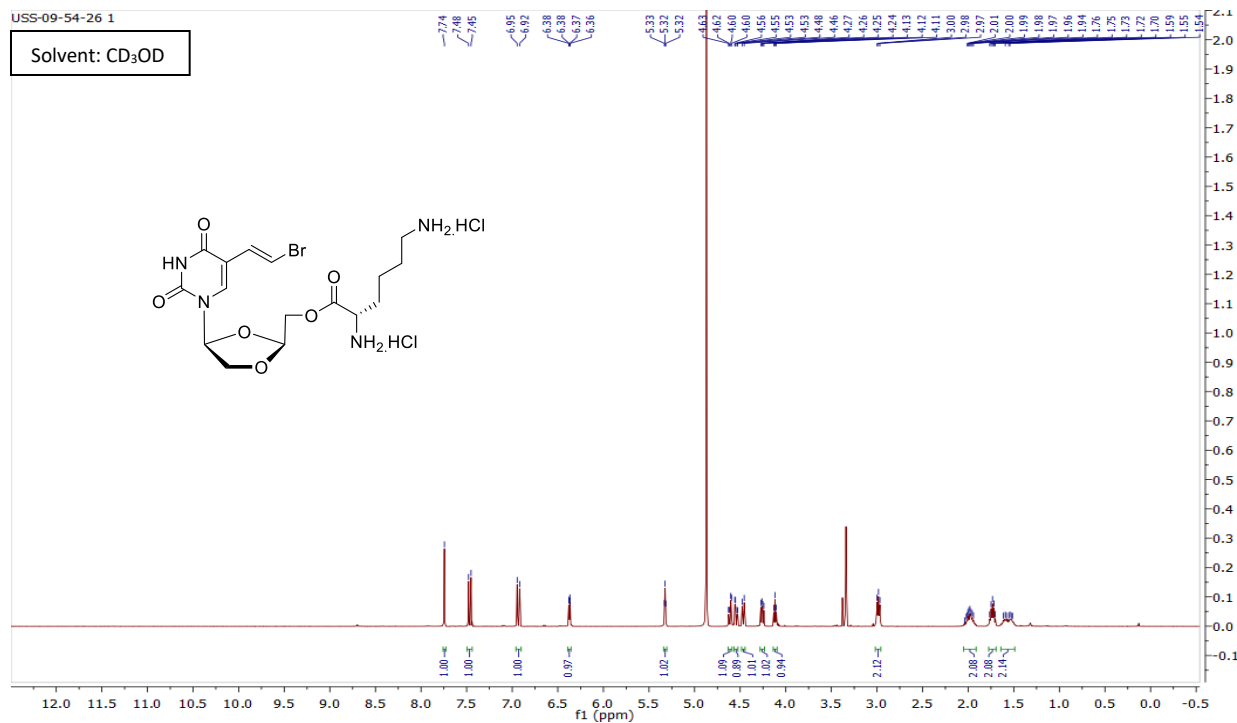

<sup>1</sup>H NMR of L-BH DU-5'-O-L-lysine ester hydrochloride (25)

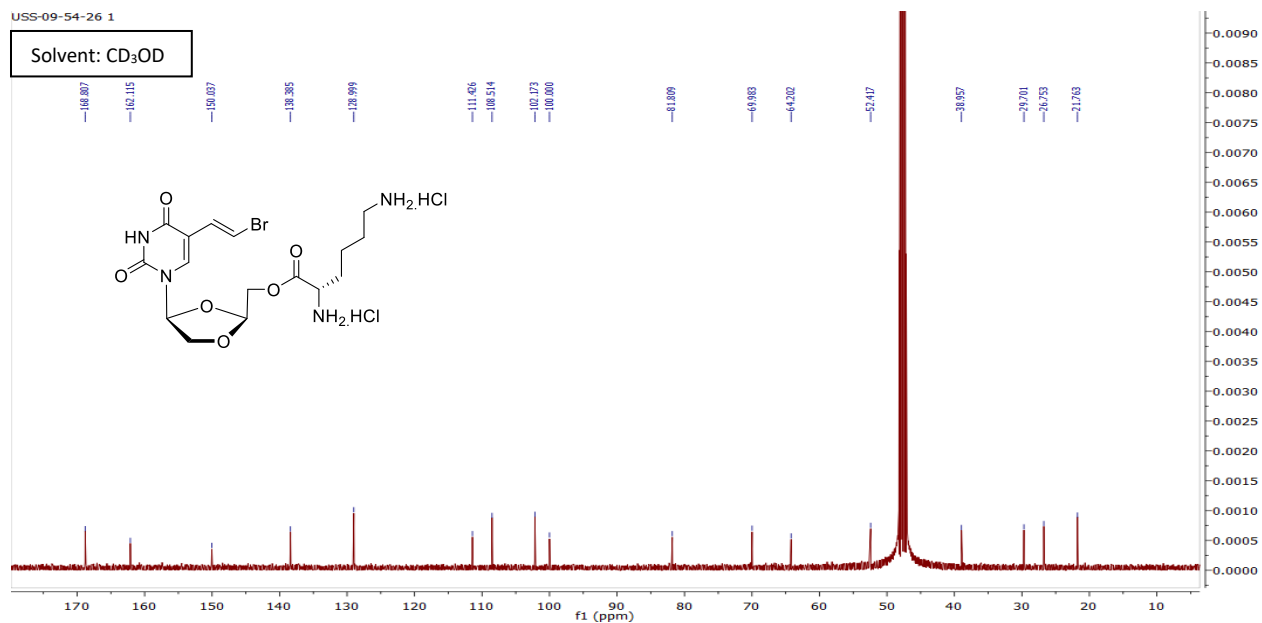

<sup>13</sup>C NMR of L-BH DU-5'-O-L-lysine ester hydrochloride (25)

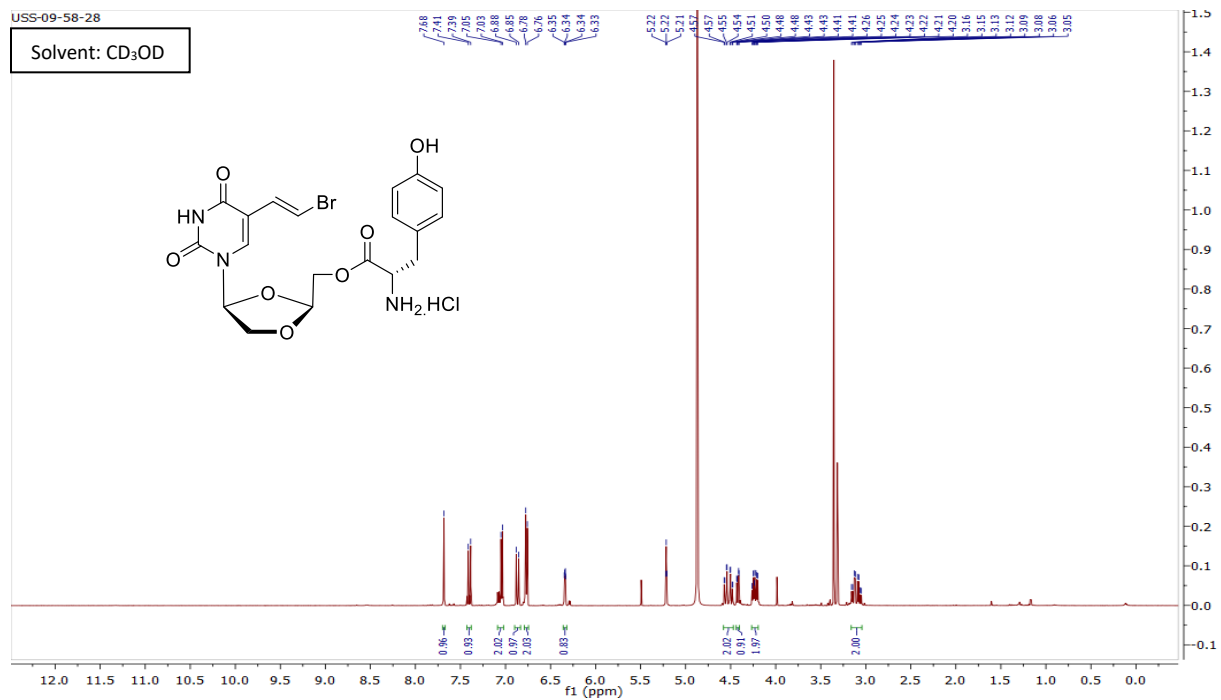

<sup>1</sup>H NMR of L-BH DU-5'-O-L-tyrosine ester hydrochloride (**26**)

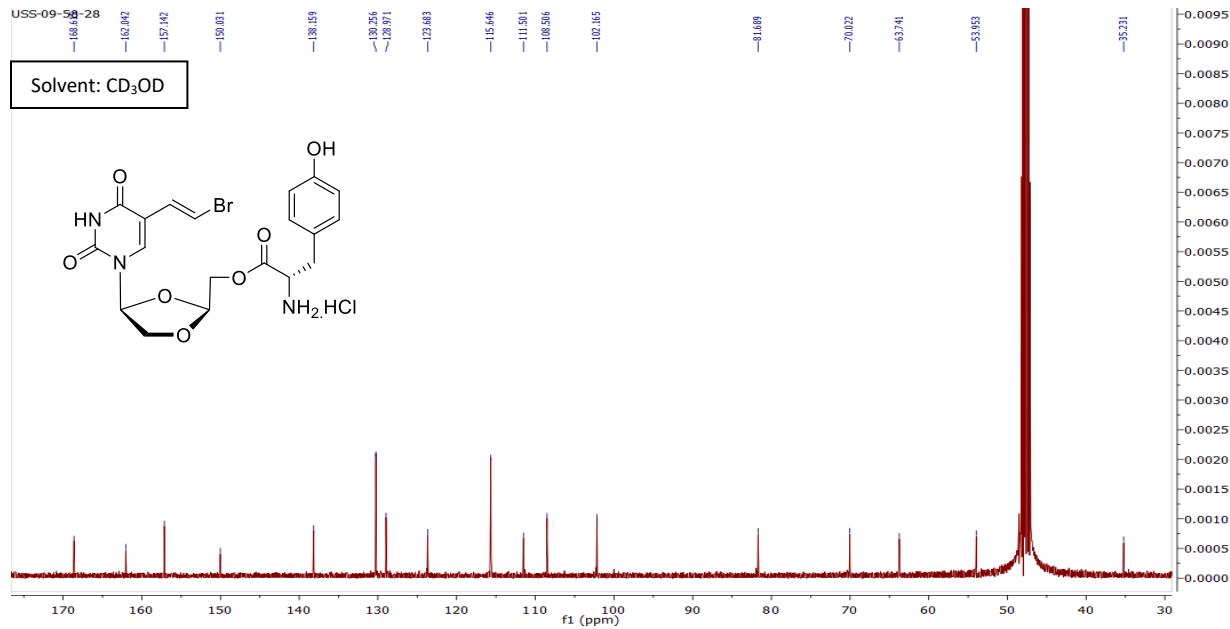

<sup>13</sup>C NMR of L-BH DU-5'-O-L-tyrosine ester hydrochloride (**26**)

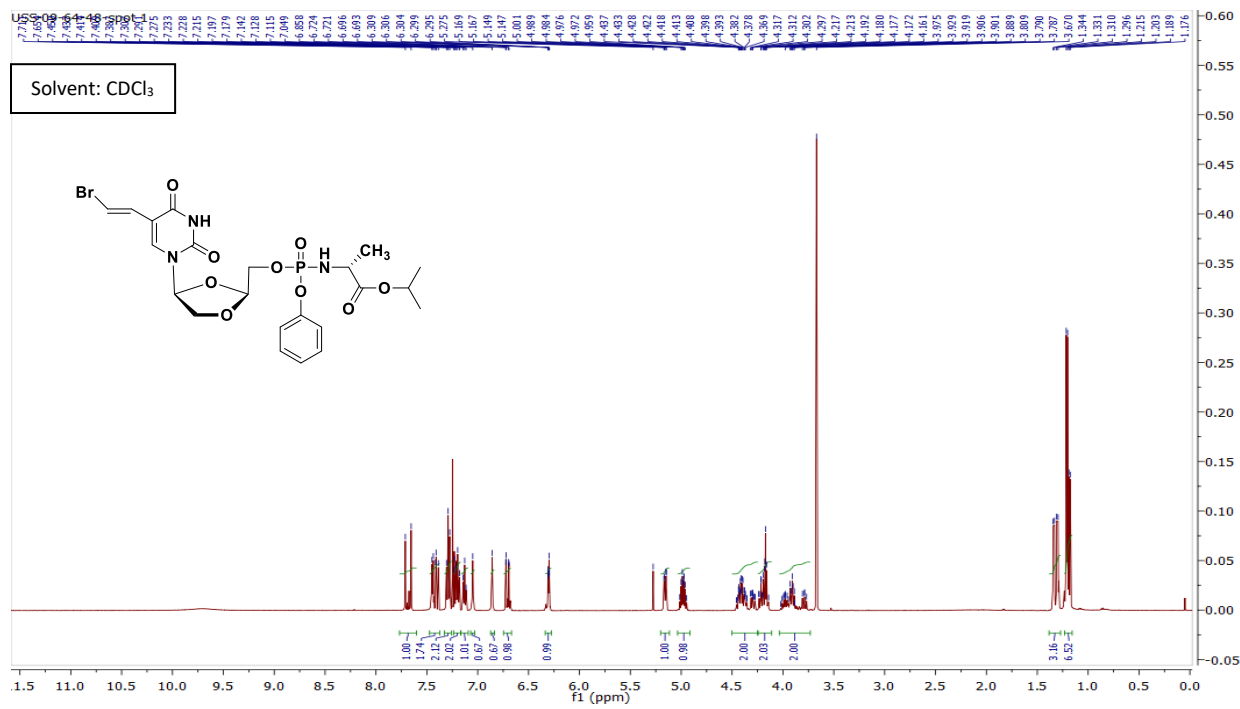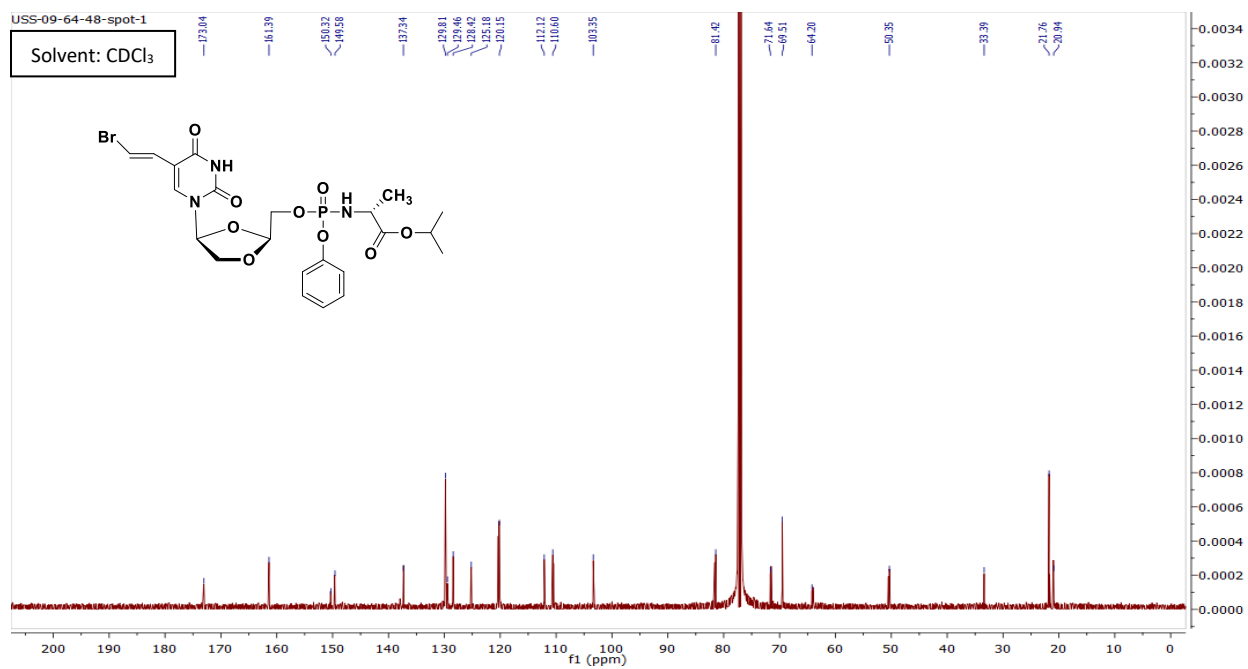

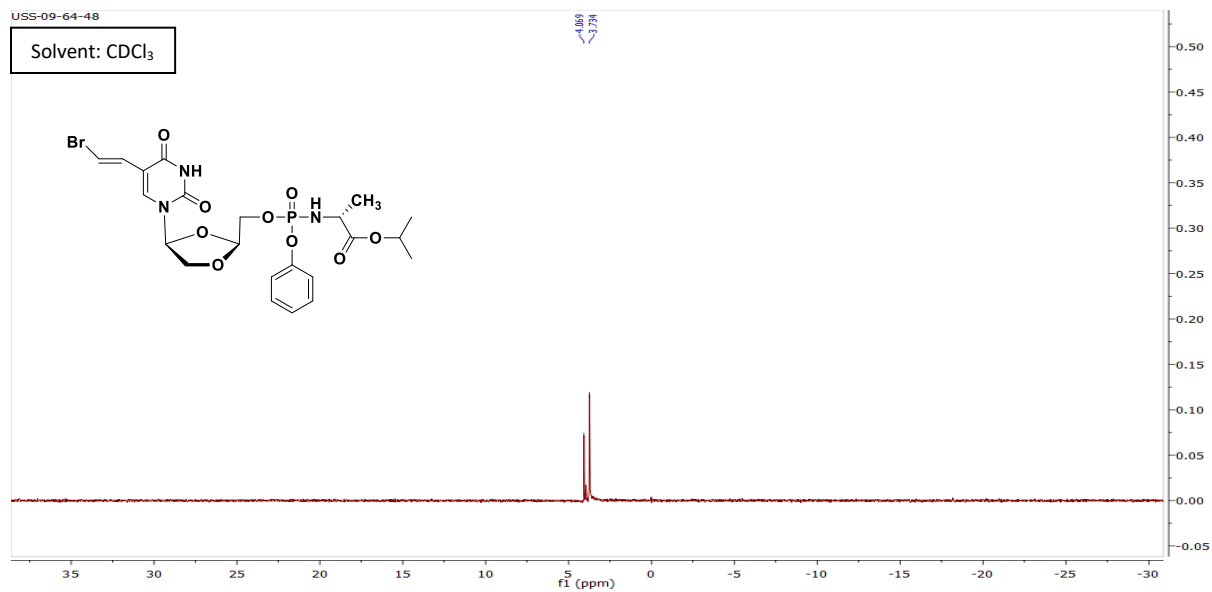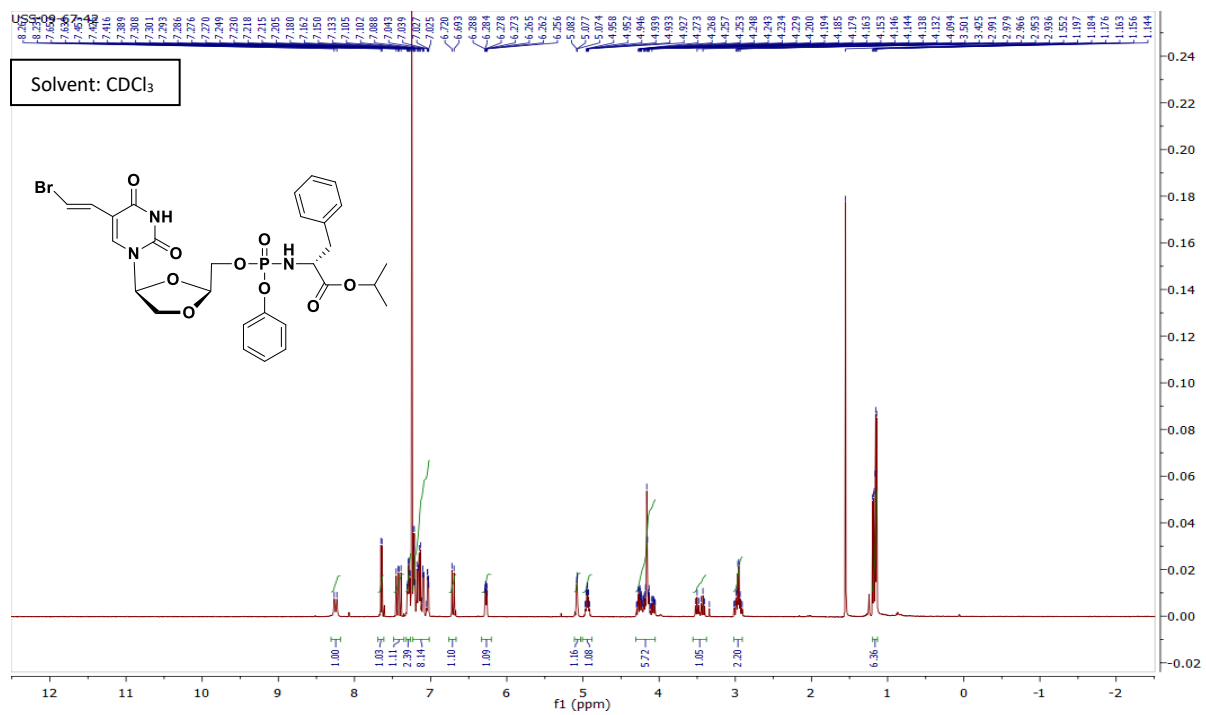

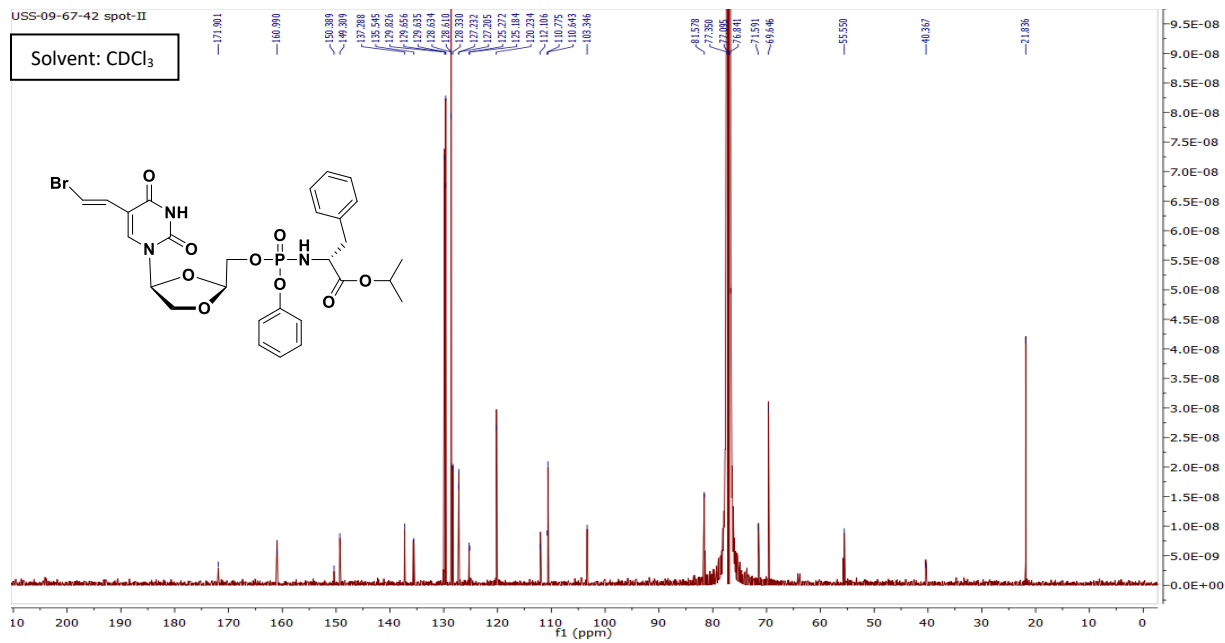

<sup>13</sup>C NMR of compound 34.

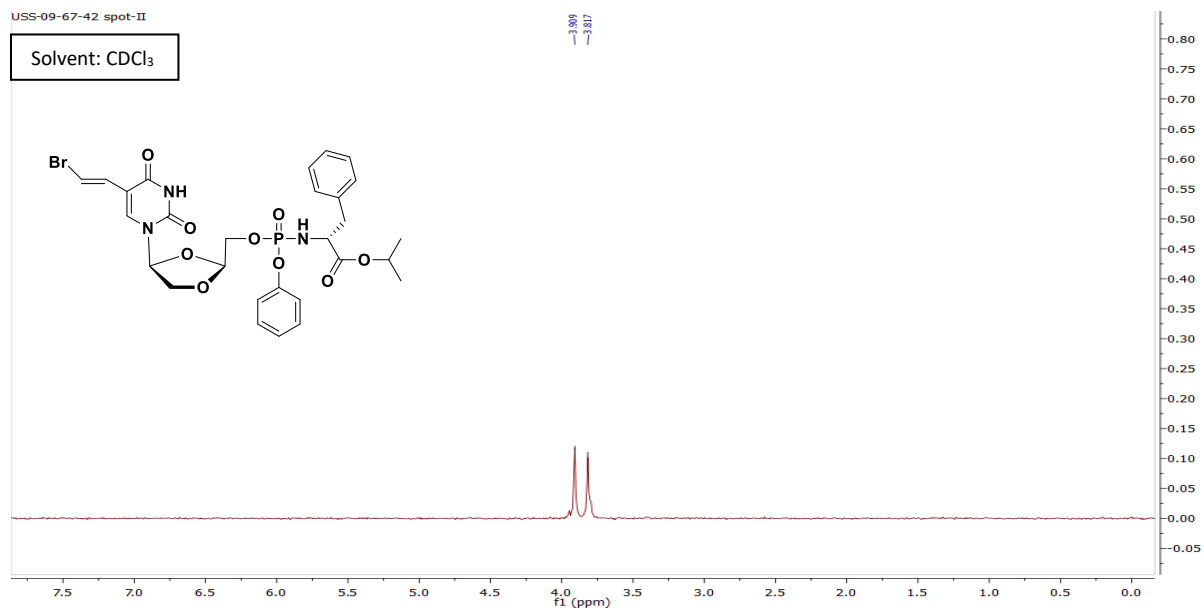

<sup>31</sup>P NMR of compound 34.

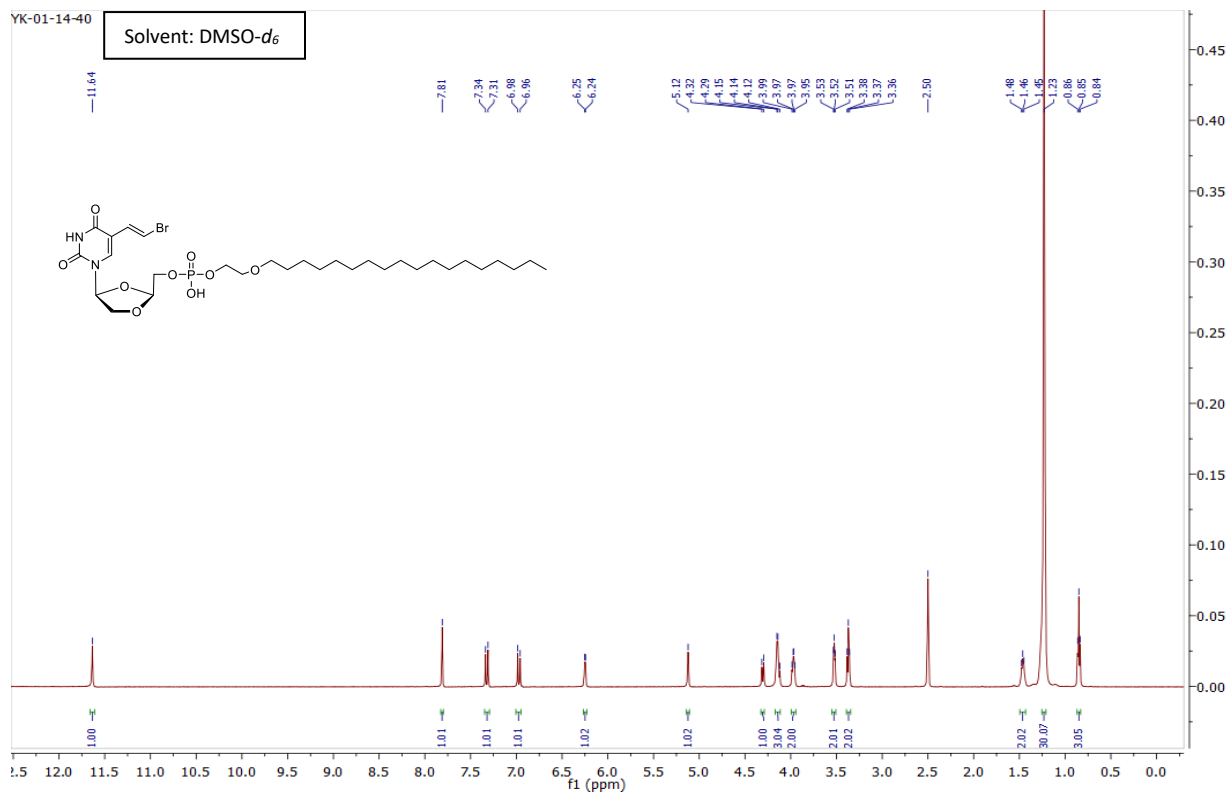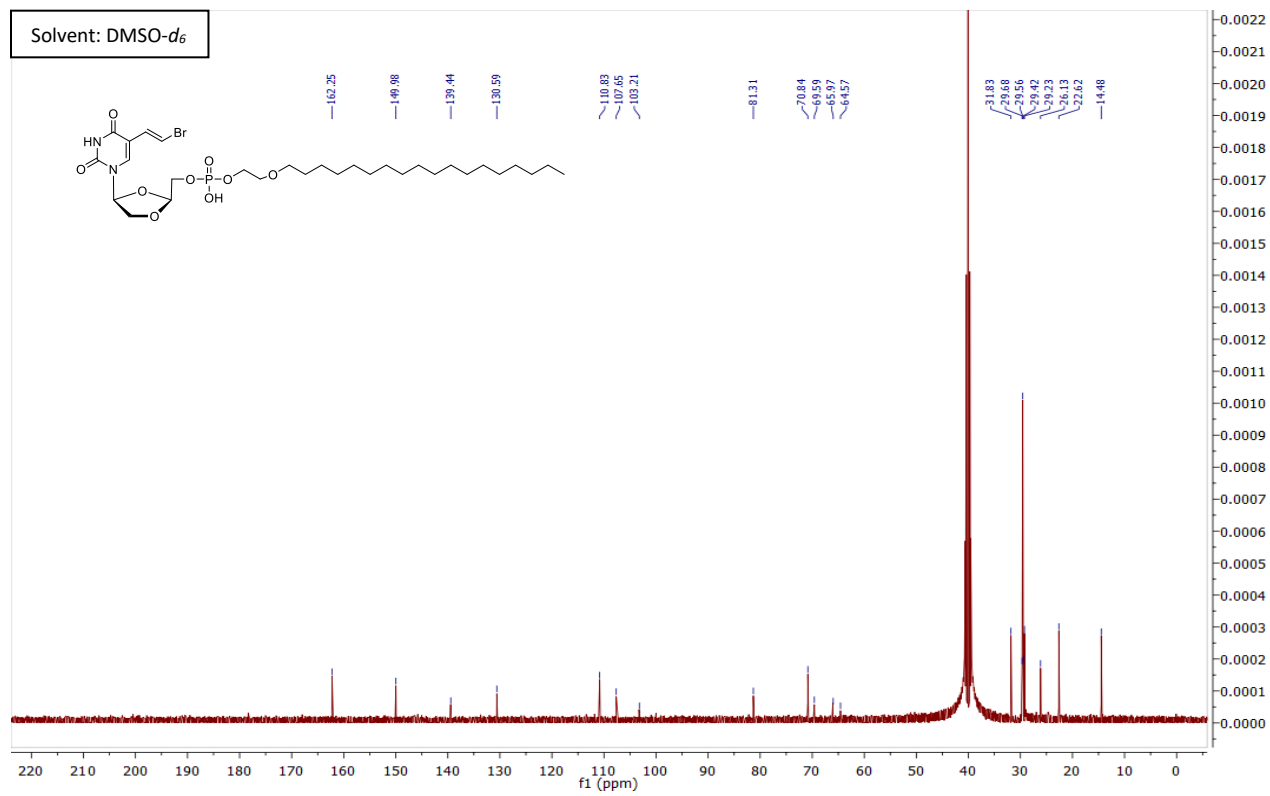

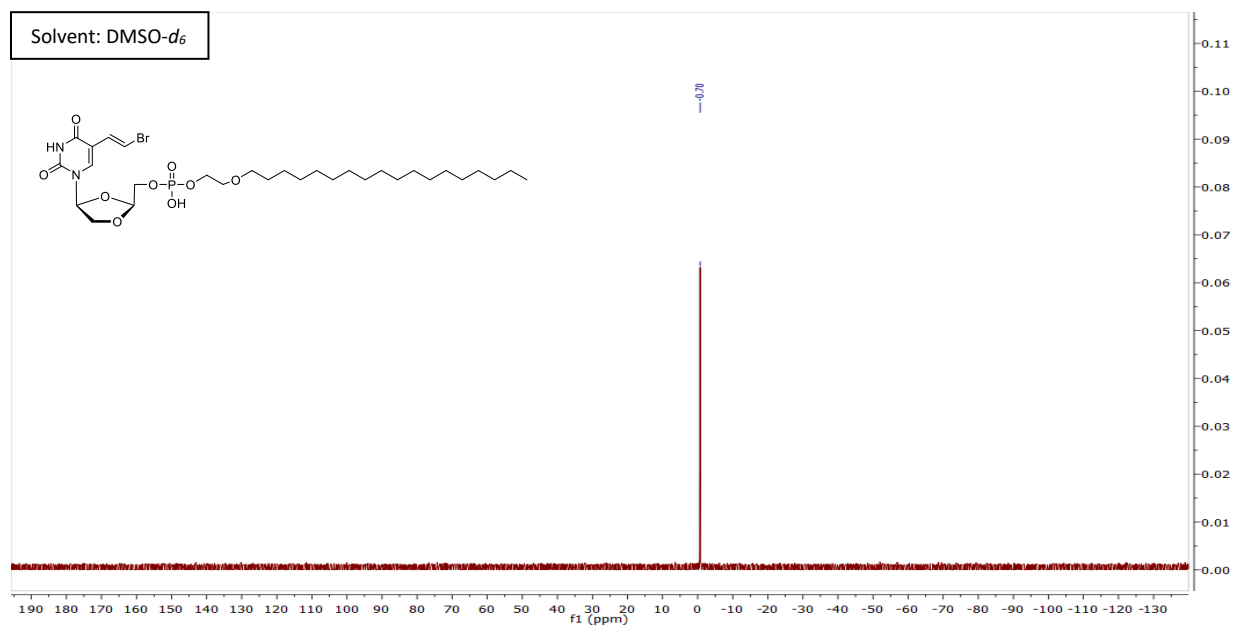

<sup>31</sup>P NMR of ODE-L-BH DU-MP (38).

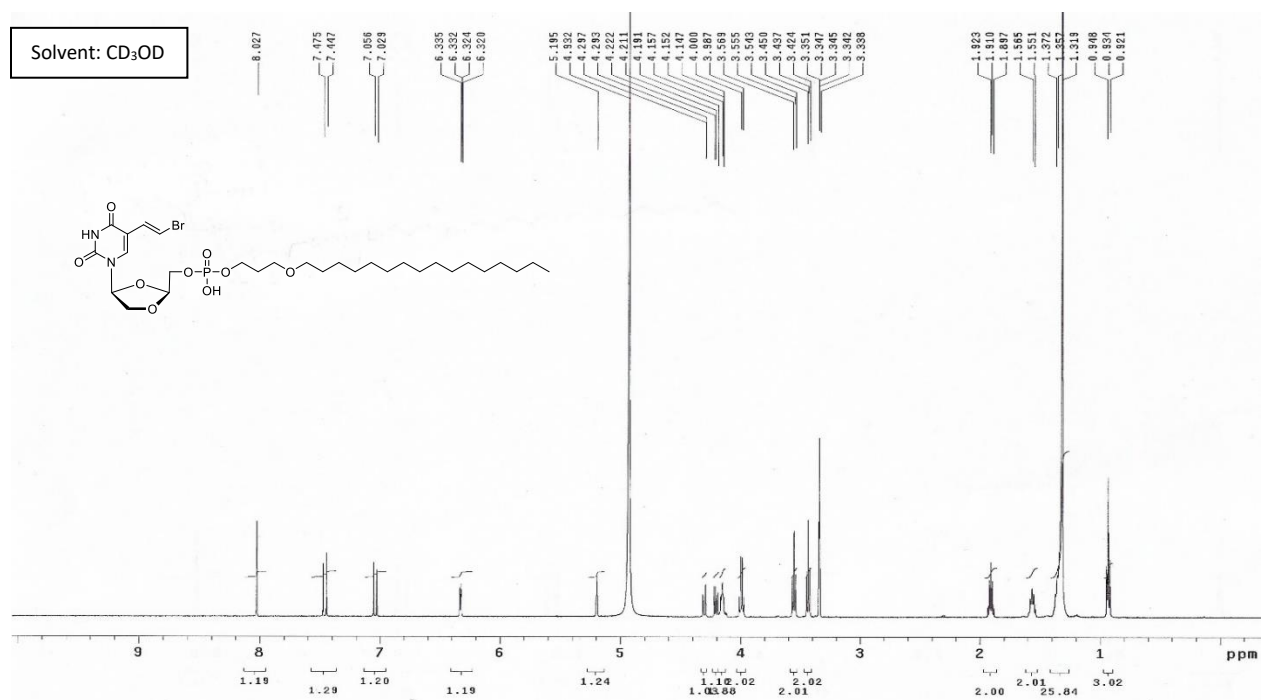

<sup>1</sup>H NMR of HDP-L-BH DU-MP (39).

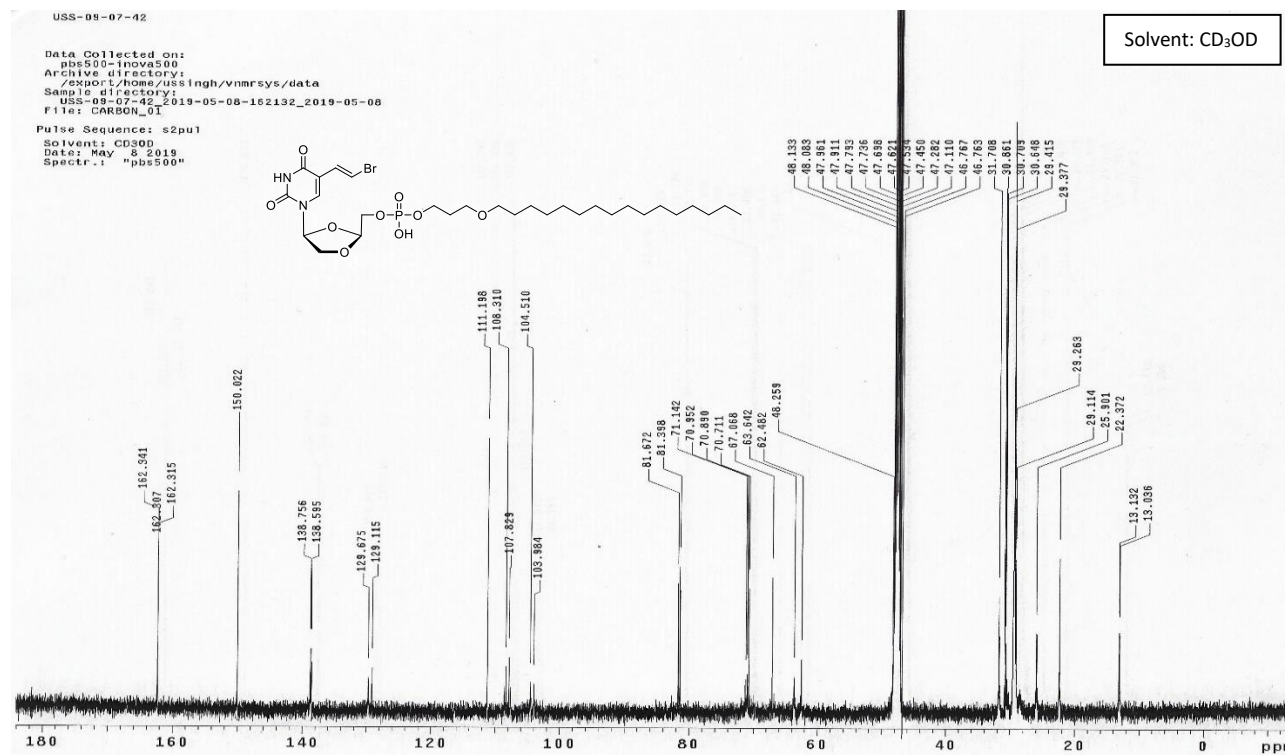

<sup>13</sup>C NMR of HDP-L-BH DU-MP (39).

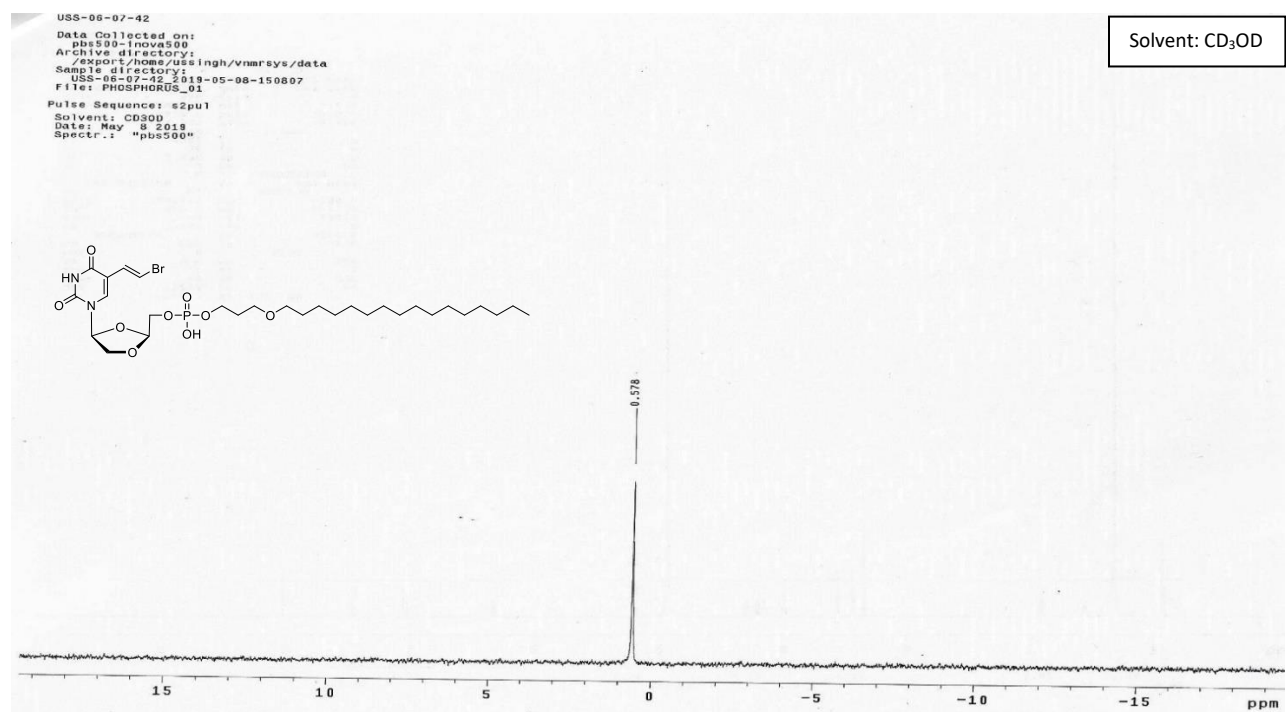

<sup>31</sup>P NMR of HDP-L-BH DU-MP (39).



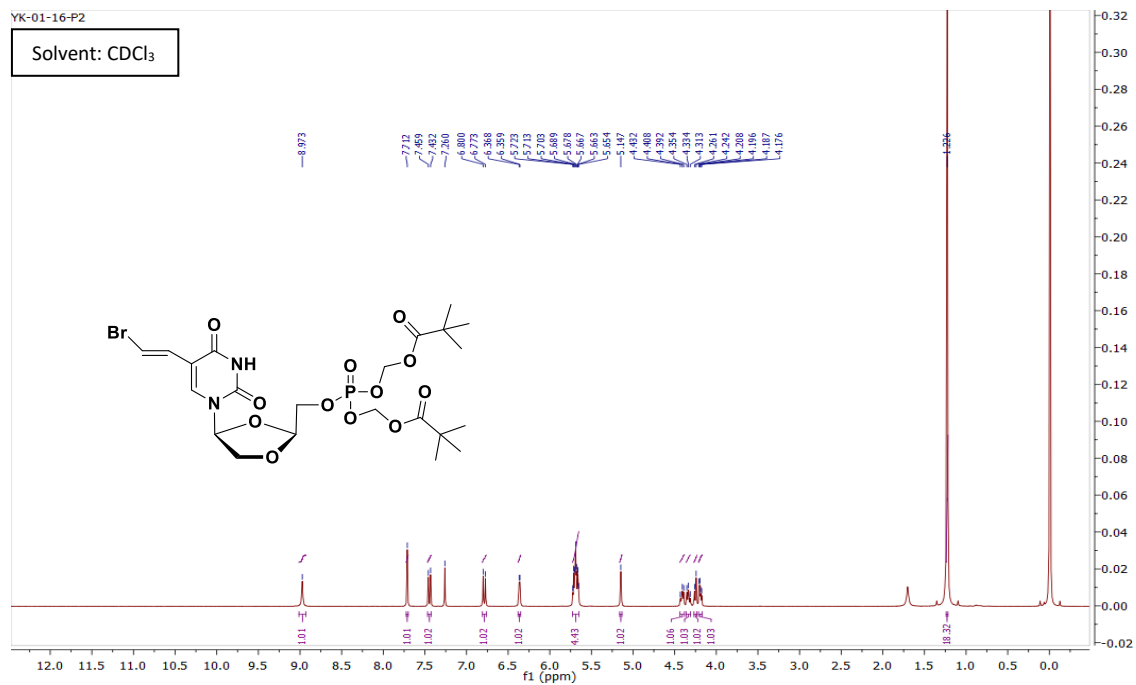

<sup>1</sup>H NMR of POM-L-BH DU-MP (41).

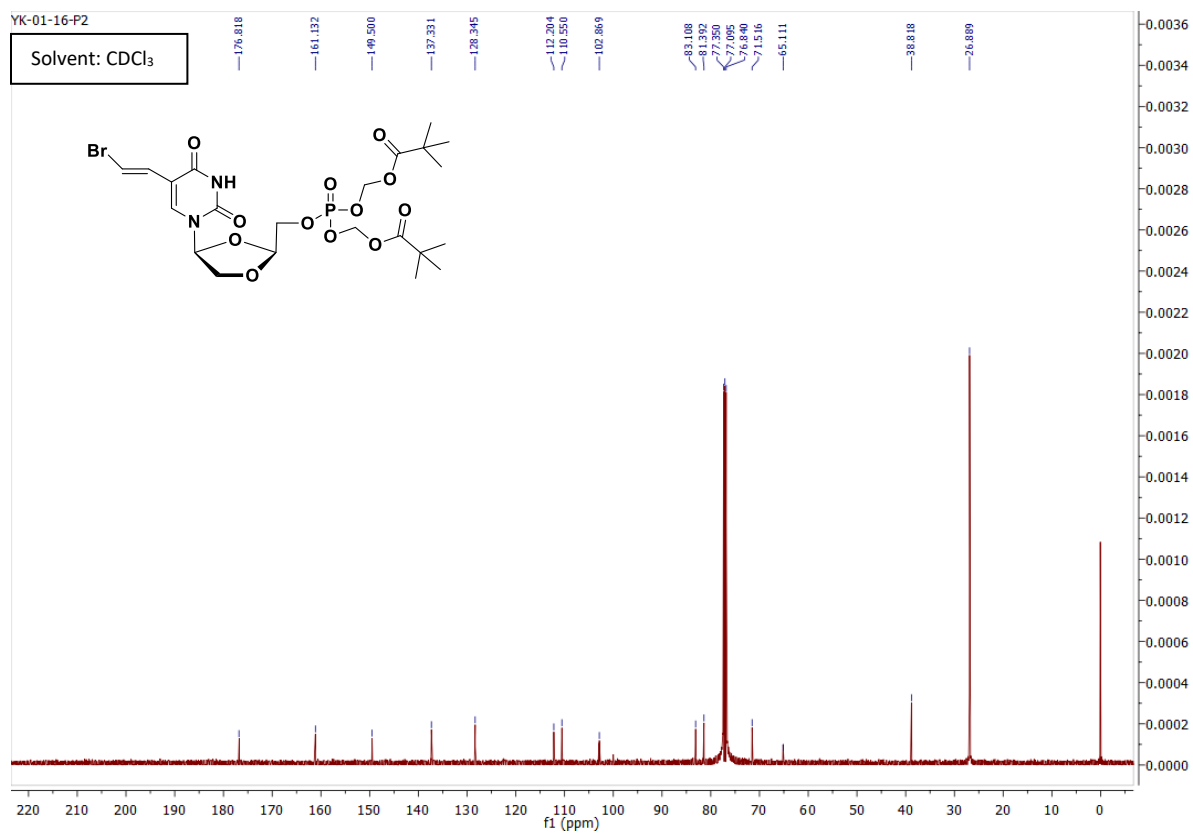

<sup>13</sup>C NMR of POM-L-BH DU-MP (41).

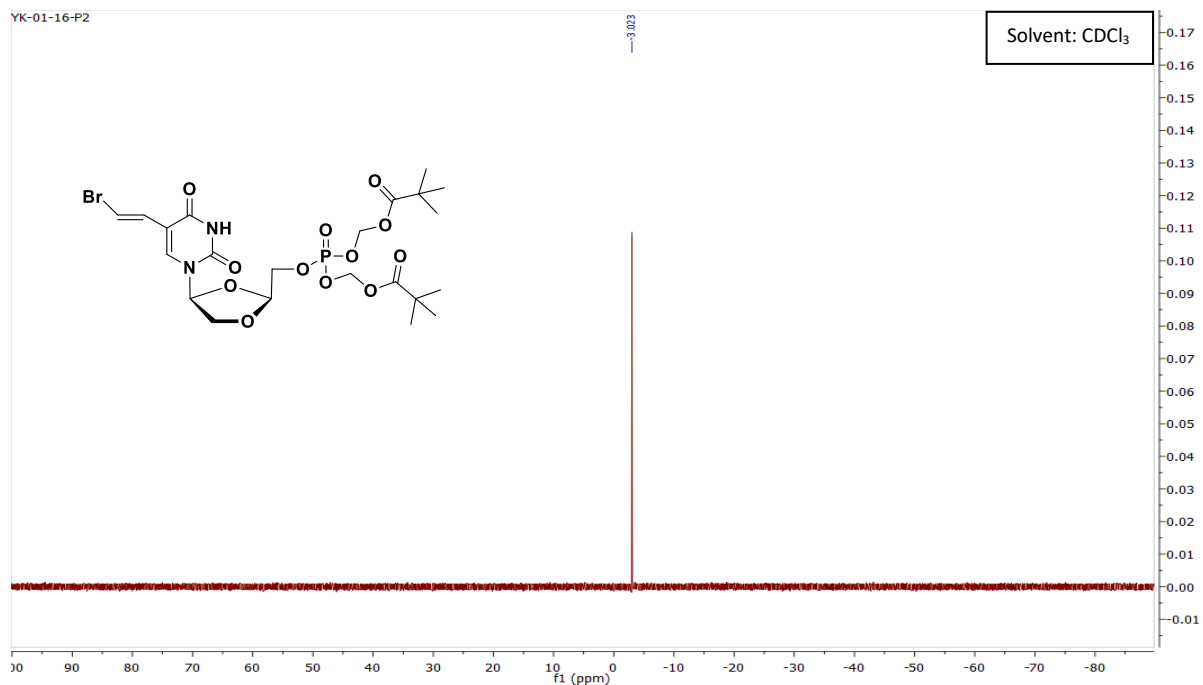

<sup>31</sup>P NMR of POM-L-BH DU-MP (41).

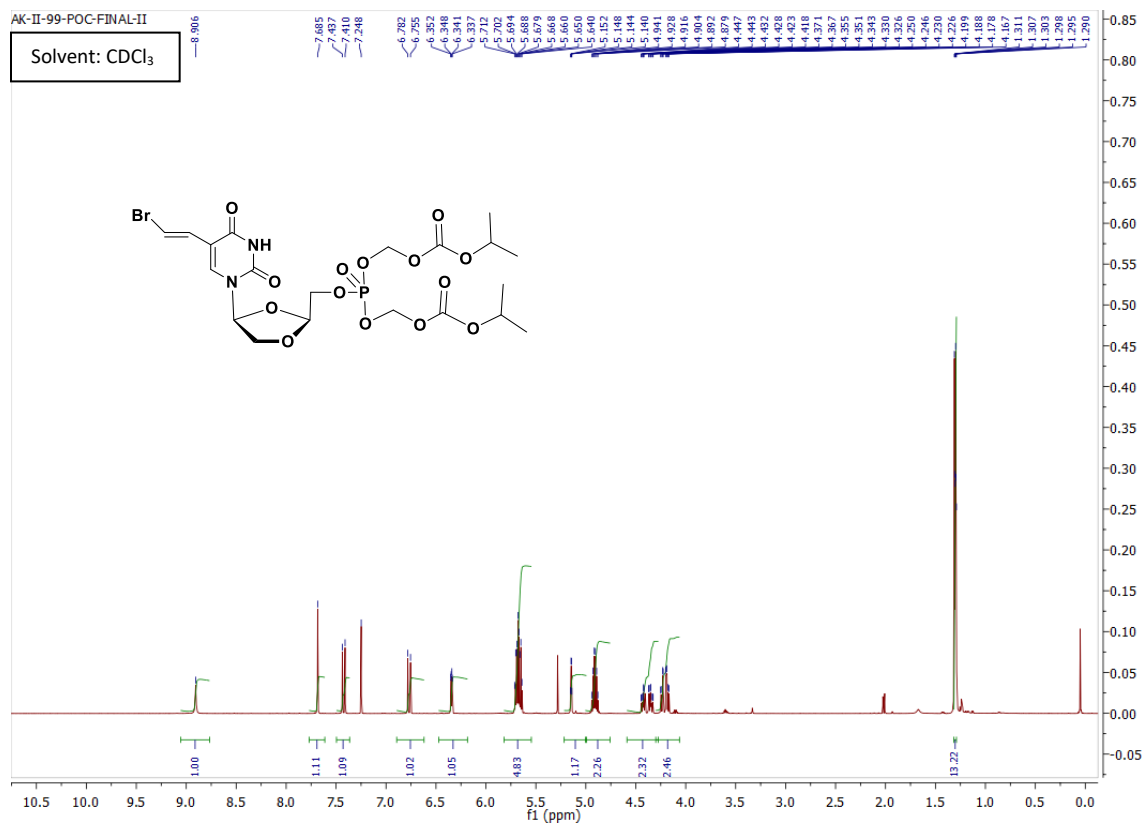

<sup>1</sup>H NMR of POC-L-BH DU-MP (47).

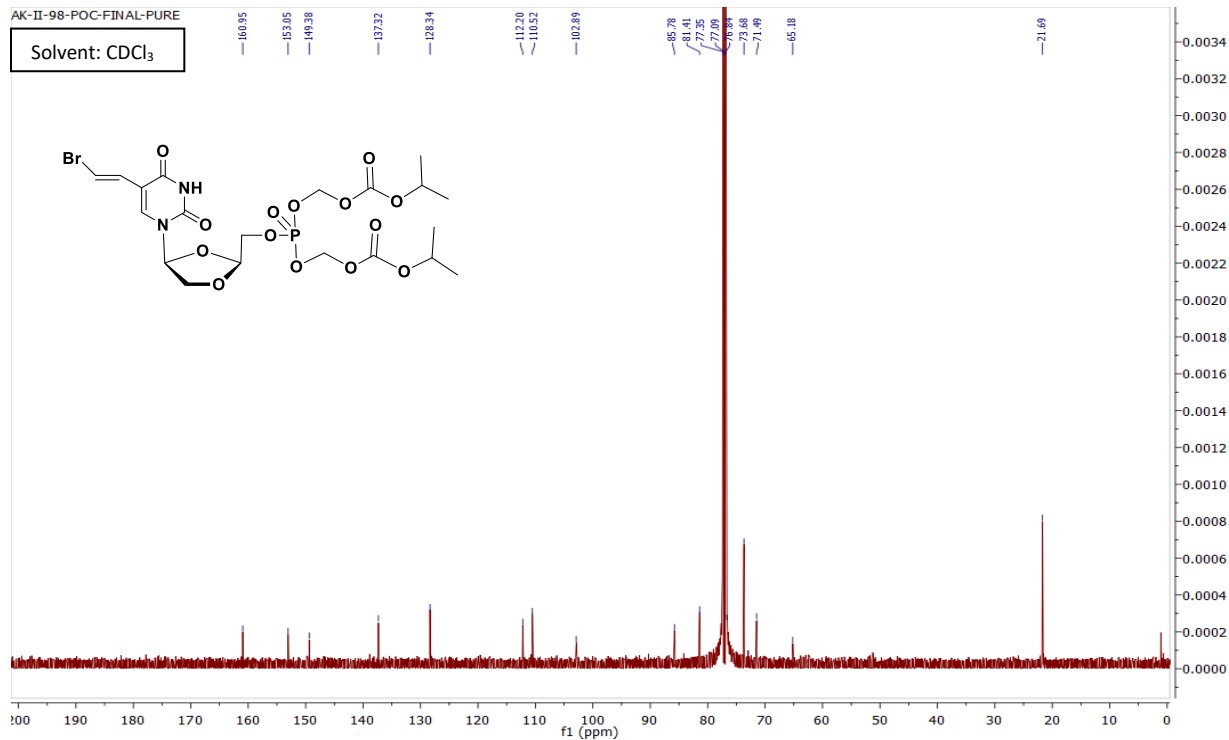

<sup>13</sup>C NMR of POC-L-BH DU-MP (47).

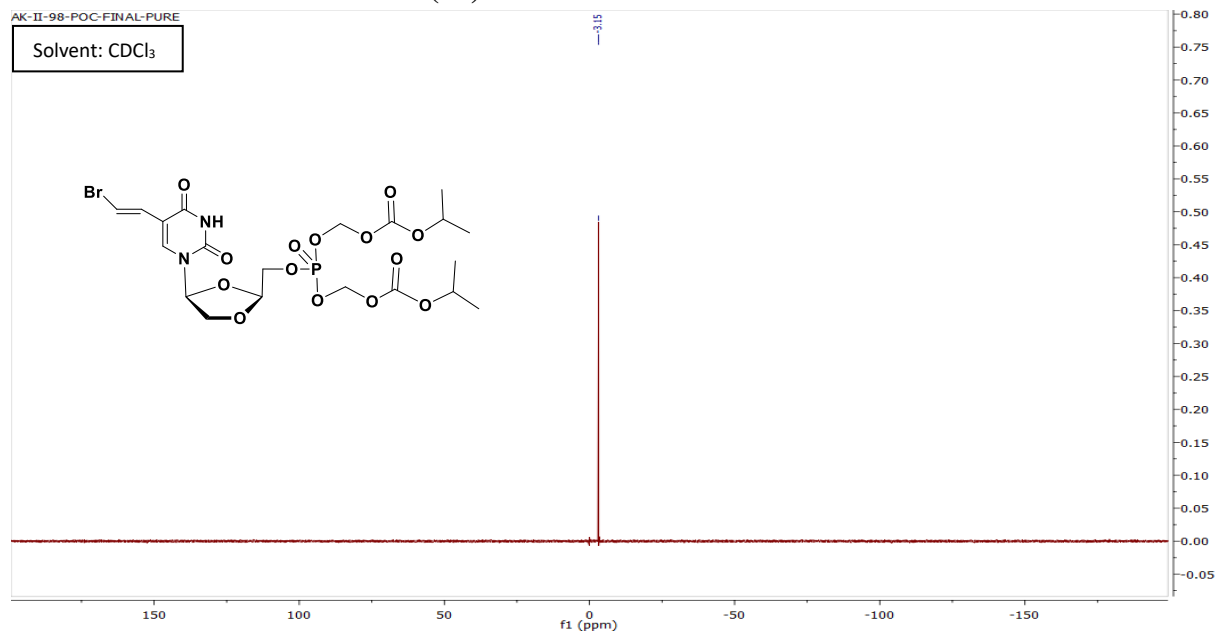

<sup>31</sup>P NMR of POC-L-BH DU-MP (47).

**Table S1:** elemental analysis of final compounds

| Compound | Molecular Formula                                                                                      | Calculated |      |       | Found |      |       |
|----------|--------------------------------------------------------------------------------------------------------|------------|------|-------|-------|------|-------|
|          |                                                                                                        | C          | H    | N     | C     | H    | N     |
| 14.      | C <sub>12</sub> H <sub>15</sub> BrClN <sub>3</sub> O <sub>6</sub> . 1.5 H <sub>2</sub> O               | 32.78      | 4.13 | 9.56  | 32.39 | 3.90 | 9.23  |
| 15.      | C <sub>13</sub> H <sub>17</sub> BrClN <sub>3</sub> O <sub>6</sub> . 1.0 H <sub>2</sub> O               | 35.11      | 4.31 | 9.45  | 35.05 | 4.32 | 9.28  |
| 16.      | C <sub>19</sub> H <sub>21</sub> BrClN <sub>3</sub> O <sub>6</sub> . 1.0 H <sub>2</sub> O               | 43.82      | 4.45 | 8.07  | 43.75 | 4.51 | 7.98  |
| 17.      | C <sub>15</sub> H <sub>21</sub> BrClN <sub>3</sub> O <sub>6</sub> . 0.5 H <sub>2</sub> O               | 38.85      | 4.78 | 9.06  | 38.82 | 4.85 | 8.96  |
| 18.      | C <sub>15</sub> H <sub>21</sub> BrClN <sub>3</sub> O <sub>6</sub> . 1.2 H <sub>2</sub> O               | 37.82      | 4.95 | 8.82  | 37.69 | 5.12 | 8.65  |
| 19.      | C <sub>21</sub> H <sub>22</sub> BrClN <sub>4</sub> O <sub>6</sub> . 1.0 H <sub>2</sub> O               | 45.06      | 4.32 | 10.0  | 44.75 | 4.46 | 9.78  |
| 20.      | C <sub>16</sub> H <sub>23</sub> BrClN <sub>3</sub> O <sub>6</sub> . 1.0 H <sub>2</sub> O               | 39.48      | 5.18 | 8.63  | 39.29 | 5.31 | 8.41  |
| 21.      | C <sub>16</sub> H <sub>23</sub> BrClN <sub>3</sub> O <sub>6</sub>                                      | 41.00      | 4.95 | 8.96  | 40.82 | 4.93 | 8.74  |
| 22.      | C <sub>15</sub> H <sub>19</sub> BrClN <sub>3</sub> O <sub>6</sub> . 1.0 H <sub>2</sub> O               | 38.28      | 4.50 | 8.93  | 38.30 | 4.50 | 8.82  |
| 23.      | C <sub>15</sub> H <sub>20</sub> BrClN <sub>4</sub> O <sub>7</sub> . 1.5 H <sub>2</sub> O               | 35.28      | 4.54 | 10.97 | 35.43 | 4.63 | 10.63 |
| 24.      | C <sub>14</sub> H <sub>19</sub> BrClN <sub>3</sub> O <sub>6</sub> . 1.0 H <sub>2</sub> O               | 36.66      | 4.61 | 9.16  | 36.94 | 4.64 | 8.77  |
| 25.      | C <sub>16</sub> H <sub>25</sub> BrCl <sub>2</sub> N <sub>4</sub> O <sub>6</sub> . 1.5 H <sub>2</sub> O | 35.12      | 5.16 | 10.24 | 35.26 | 5.28 | 9.87  |
| 26.      | C <sub>19</sub> H <sub>21</sub> BrClN <sub>3</sub> O <sub>7</sub> . 1.0 H <sub>2</sub> O               | 42.52      | 4.32 | 7.83  | 42.54 | 4.42 | 7.68  |
| 33.      | C <sub>22</sub> H <sub>27</sub> BrN <sub>3</sub> O <sub>9</sub> P                                      | 44.91      | 4.63 | 7.14  | 45.23 | 4.92 | 6.85  |
| 34.      | C <sub>28</sub> H <sub>31</sub> BrN <sub>3</sub> O <sub>9</sub> P                                      | 50.61      | 4.70 | 6.32  | 50.92 | 4.95 | 6.11  |
| 38.      | C <sub>30</sub> H <sub>52</sub> BrN <sub>2</sub> O <sub>9</sub> P. 0.5 H <sub>2</sub> O                | 51.14      | 7.58 | 3.98  | 51.20 | 7.55 | 3.92  |
| 39.      | C <sub>29</sub> H <sub>50</sub> BrN <sub>2</sub> O <sub>9</sub> P. 0.9 H <sub>2</sub> O                | 49.92      | 7.48 | 4.01  | 49.65 | 7.62 | 3.69  |
| 41.      | C <sub>22</sub> H <sub>32</sub> BrN <sub>3</sub> O <sub>12</sub> P                                     | 42.12      | 5.14 | 4.47  | 42.34 | 5.23 | 4.26  |

## HPLC method and trace for compound (1)

| HPLC Method Conditions |                                  |                     |                                                                                 |
|------------------------|----------------------------------|---------------------|---------------------------------------------------------------------------------|
| Column                 | XBridge C18 (4.6x150), mm, 3.5µm | Sample              | YK-02-22-P                                                                      |
| Mobile Phase-A         | 10mM Ammonium Acetate in Water   | Vial                | 1:F                                                                             |
| Mobile Phase-B         | 100% Acetonitrile                | Injection Volume    | 0.5 µL                                                                          |
| Gradient (T% B)        | 0/10,1/10,10/95,15/95,15.1/10    | Run Time            | 20 minutes                                                                      |
| Flow Rate              | 0.8 mL/min                       | Proc. Chnl. Descr.: | 2998 PDA MaxPlot (190.0 nm to 800.0 nm) (2998(210-400)nm) Subtracted from blank |
| Column oven Temp       | Ambient                          | Acq. Method Set:    | Method_1_COL-2                                                                  |
| Diluent: MeOH          |                                  |                     |                                                                                 |

### Auto-Scaled Chromatogram

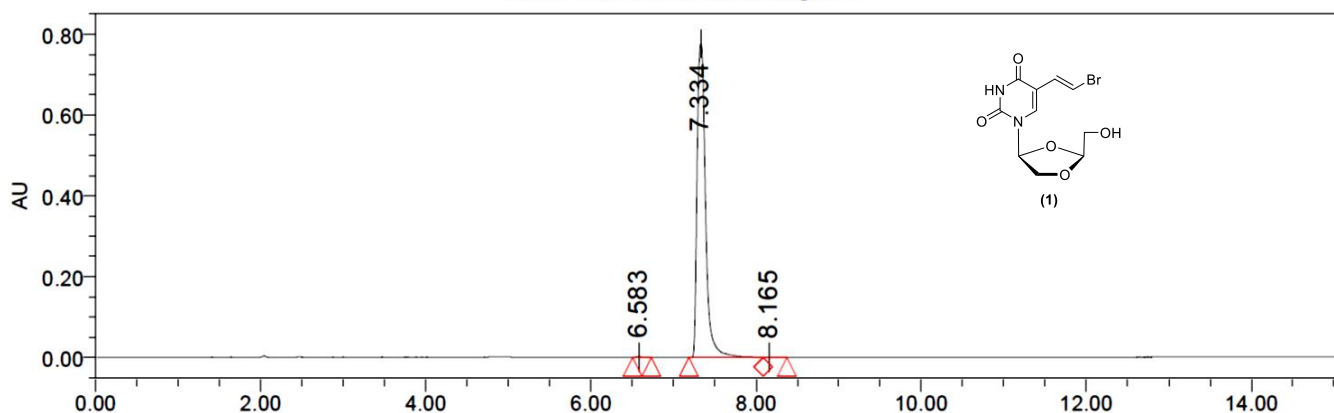

#### Peak Results

|   | RT    | Area    | % Area |
|---|-------|---------|--------|
| 1 | 6.583 | 3900    | 0.07   |
| 2 | 7.334 | 5515706 | 99.85  |
| 3 | 8.165 | 4112    | 0.07   |

## HPLC method and trace for compound (24)

| HPLC Method Conditions |                                        |                     |                                                                                 |
|------------------------|----------------------------------------|---------------------|---------------------------------------------------------------------------------|
| Column                 | XBridge C18 (4.6x150), mm, 3.5 $\mu$ m | Sample              | USS-09-40-26                                                                    |
| Mobile Phase-A         | 10mM Ammonium Acetate in Water         | Vial                | 1:F                                                                             |
| Mobile Phase-B         | 100% Acetonitrile                      | Injection Volume    | 0.5 $\mu$ L                                                                     |
| Gradient (T% B)        | 0/10,1/10,10/95,15/95,15.1/10          | Run Time            | 20 minutes                                                                      |
| Flow Rate              | 0.8 mL/min                             | Proc. Chnl. Descr.: | 2998 PDA MaxPlot (190.0 nm to 800.0 nm) (2998(210-400)nm) Subtracted from blank |
| Column oven Temp       | Ambient                                | Acq. Method Set:    | Method_1_COL-2                                                                  |
| Diluent: MeOH          |                                        |                     |                                                                                 |

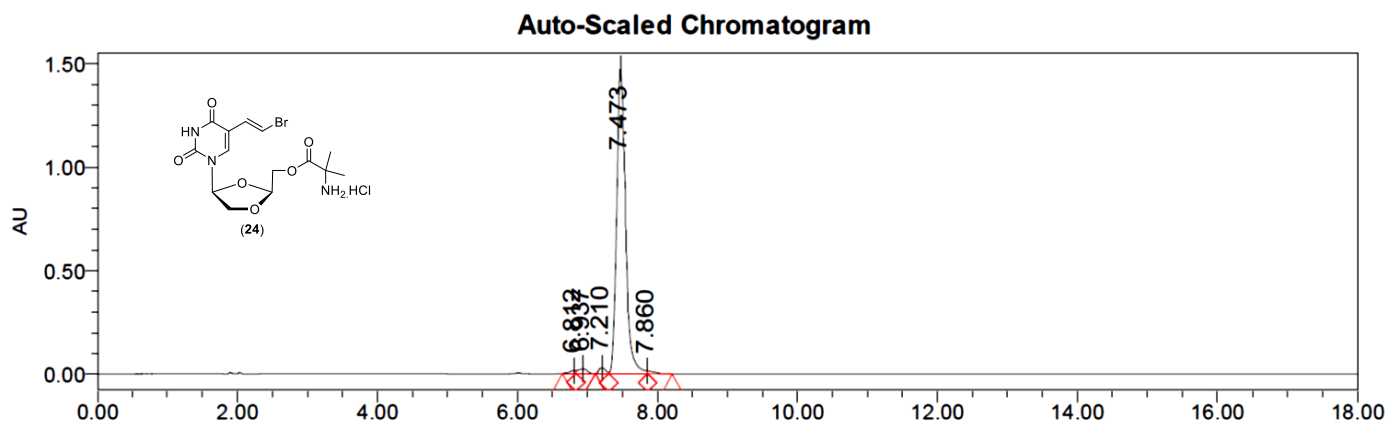

### Peak Results

|   | RT    | Area     | % Area |
|---|-------|----------|--------|
| 1 | 6.812 | 89312    | 0.66   |
| 2 | 6.937 | 215246   | 1.60   |
| 3 | 7.210 | 179665   | 1.34   |
| 4 | 7.473 | 12863074 | 95.63  |
| 5 | 7.860 | 103434   | 0.77   |

## HPLC method and trace for compound (34)

| HPLC Method Conditions      |                                              |                     |                                                                                  |
|-----------------------------|----------------------------------------------|---------------------|----------------------------------------------------------------------------------|
| Column                      | UPLC BEH C18 (100x2.1), mm, 1.7 $\mu$ m      | Sample              | USS-09-67-42                                                                     |
| Mobile Phase-A              | 0.05% FA in water                            | Vial                | 2:C,8                                                                            |
| Mobile Phase-B              | 0.05% FA in ACN                              | Injection Volume    | 0.5 $\mu$ L                                                                      |
| Gradient (T% B)             | 0/3, 0.5/3, 3/15, 5/100, 8/100, 8.10/3, 10/3 | Run Time            | 10 minutes                                                                       |
| Flow Rate                   | 0.8 mL/min                                   | Proc. Chnl. Descr.: | 2998 PDA MaxPlot (190.0 nm to 800.0 nm) (2998(210-400) nm) Subtracted from Blank |
| Column oven Temp            | 50 $^{\circ}$ C                              | Acq. Method Set:    | Method_1_COL-2                                                                   |
| Diluent: Acetonitrile (ACN) |                                              |                     |                                                                                  |

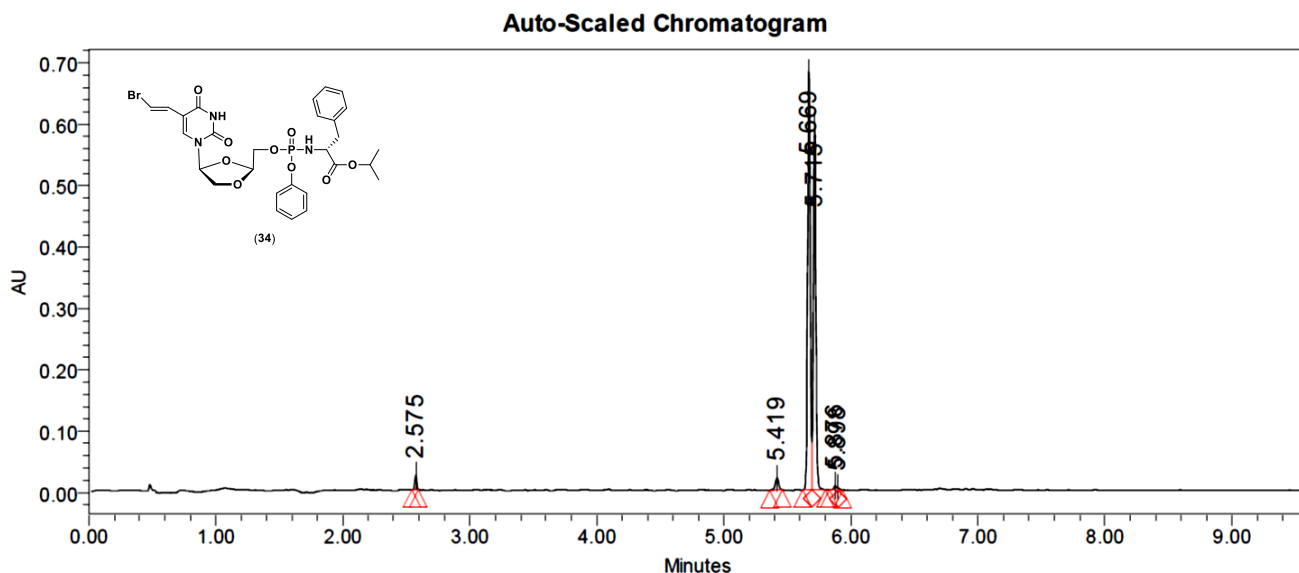

### Peak Results

|   | RT    | Area   | Height | % Area |
|---|-------|--------|--------|--------|
| 1 | 2.575 | 24554  | 23527  | 1.30   |
| 2 | 5.419 | 37276  | 19381  | 1.97   |
| 3 | 5.669 | 970842 | 683177 | 51.31  |
| 4 | 5.715 | 844265 | 596844 | 44.62  |
| 5 | 5.876 | 11377  | 7188   | 0.60   |

|   | RT    | Area | Height | % Area |
|---|-------|------|--------|--------|
| 6 | 5.898 | 3622 | 3512   | 0.19   |

Mixture of two diastereomers  
 Diastereomer 1 = 51.31  
 Diastereomer 2 = 44.62  
 Total HPLC purity = 95.93

## HPLC method and trace for compound (38)

| HPLC Method Conditions |                                        |                  |                                                            |
|------------------------|----------------------------------------|------------------|------------------------------------------------------------|
| Column                 | XBridge C18 (4.6x150), mm, 3.5 $\mu$ m | Sample           | YK-01-14-40                                                |
| Mobile Phase-A         | 10mM Ammonium Acetate in Water         | Vial             | 1:F                                                        |
| Mobile Phase-B         | 100% Acetonitrile                      | Injection Volume | 0.5 $\mu$ L                                                |
| Gradient (T% B)        | 0/50,1/50,10/95,20/95, 21/50           | Run Time         | 20 minutes                                                 |
| Flow Rate              | 0.8 mL/min                             | Proc. Chnl.      | 2998 PDA MaxPlot (190.0 nm to 800.0 nm) (2998(210-400) nm) |
| Column oven Temp       | Ambient                                | Acq. Method Set: | Method_1_COL-2                                             |
| Diluent: MeOH+DMSO     |                                        |                  |                                                            |

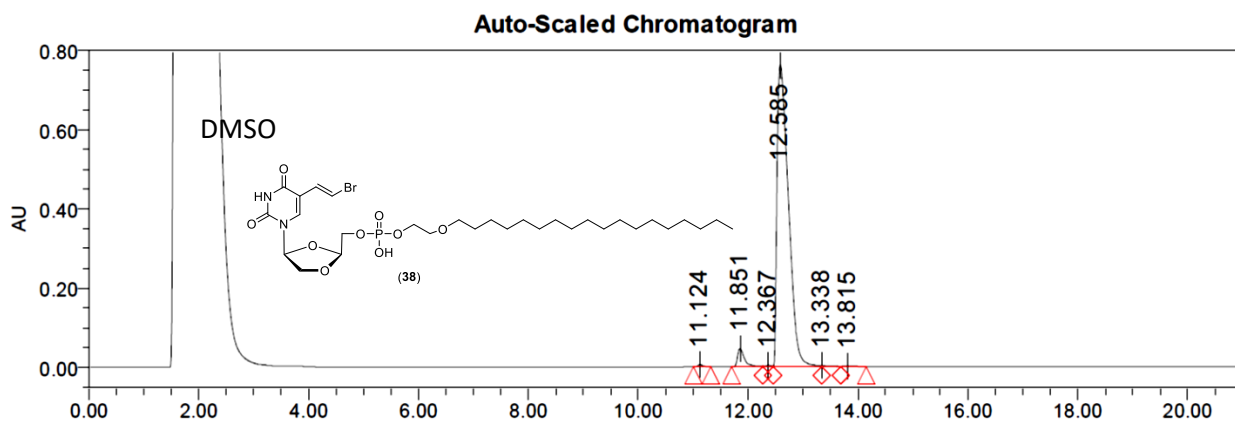

### Peak Results

|   | RT     | Area     | % Area |
|---|--------|----------|--------|
| 1 | 11.124 | 32548    | 0.28   |
| 2 | 11.851 | 411117   | 3.58   |
| 3 | 12.367 | 26936    | 0.23   |
| 4 | 12.585 | 10970267 | 95.52  |
| 5 | 13.338 | 26873    | 0.23   |
| 6 | 13.815 | 17312    | 0.15   |

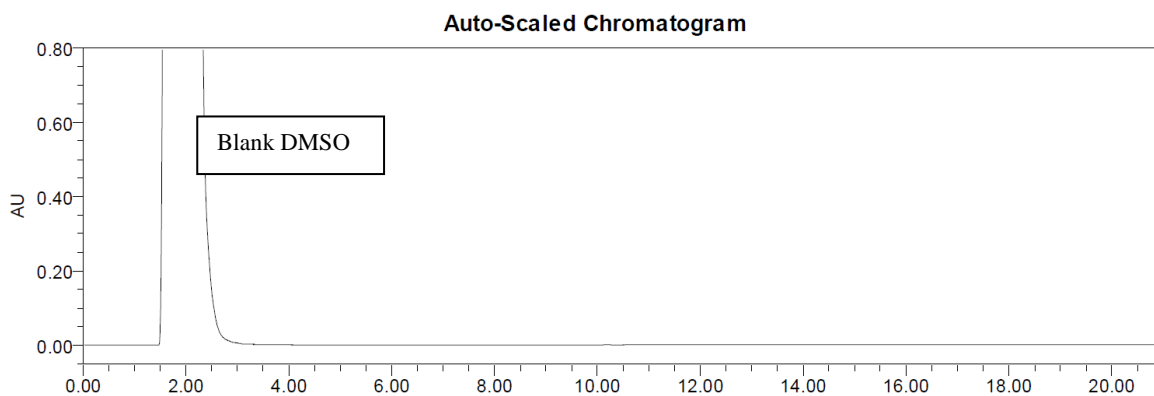

### Peak Results

|   | RT | Area | % Area |
|---|----|------|--------|
| 1 |    |      |        |



### HPLC method and trace for compound (39)

| HPLC Method Conditions |                                  |                  |                                                           |
|------------------------|----------------------------------|------------------|-----------------------------------------------------------|
| Column                 | XBridge C18 (4.6x150), mm, 3.5µm | Sample           | USS-09-07-42                                              |
| Mobile Phase-A         | 10mM Ammonium Acetate in Water   | Vial             | 1:F                                                       |
| Mobile Phase-B         | 100% Acetonitrile                | Injection Volume | 0.5 µL                                                    |
| Gradient (T% B)        | 0/50,1/50,10/95,20/95, 21/50     | Run Time         | 20 minute                                                 |
| Flow Rate              | 0.8 mL/min                       | Proc. Chnl.      | 2998 PDA MaxPlot (190.0 nm to 800.0 nm) (2998(210-400)nm) |
| Column oven Temp       | Ambient                          | Acq. Method Set: | Method_1_COL-2                                            |
| Diluent: MeOH+DMSO     |                                  |                  |                                                           |

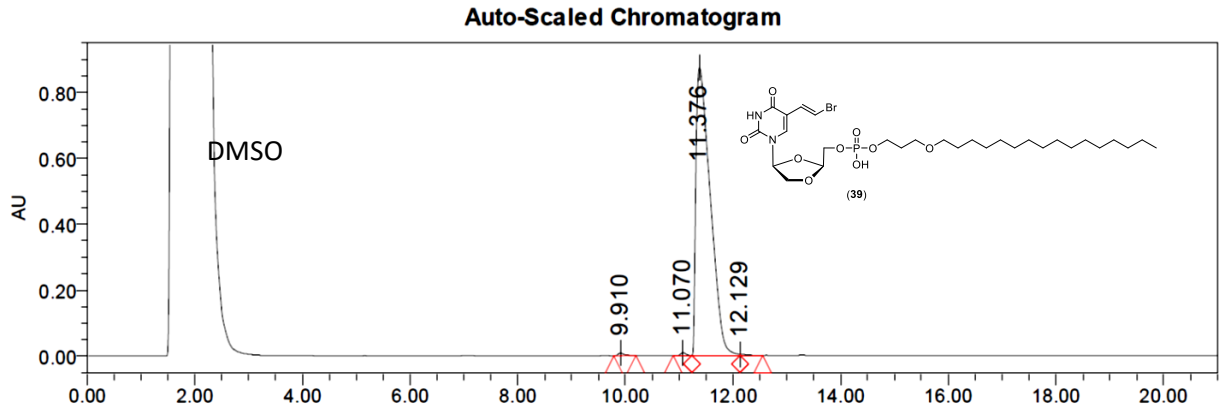

**Peak Results**

|   | RT     | Area     | % Area |
|---|--------|----------|--------|
| 1 | 9.910  | 70920    | 0.43   |
| 2 | 11.070 | 67562    | 0.41   |
| 3 | 11.376 | 16151477 | 98.97  |
| 4 | 12.129 | 29648    | 0.18   |

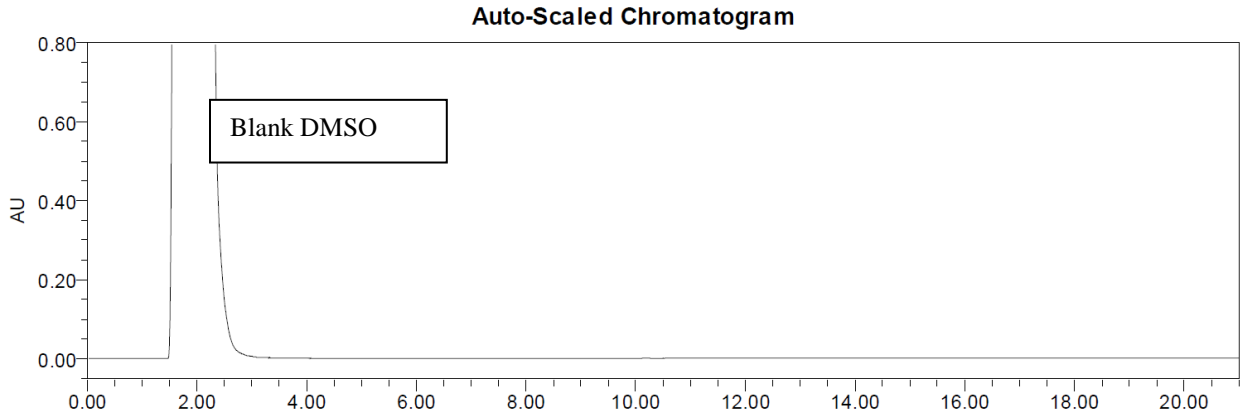

**Peak Results**

|   | RT | Area | % Area |
|---|----|------|--------|
| 1 |    |      |        |

## HPLC method and trace for compound (41)

| HPLC Method Conditions |                                        |                     |                                                                                  |
|------------------------|----------------------------------------|---------------------|----------------------------------------------------------------------------------|
| Column                 | XBridge C18 (4.6x150), mm, 3.5 $\mu$ m | Sample              | YK-01-16-P-2                                                                     |
| Mobile Phase-A         | 10mM Ammonium Acetate in Water         | Vial                | 1:F                                                                              |
| Mobile Phase-B         | 100% Acetonitrile                      | Injection Volume    | 0.5 $\mu$ L                                                                      |
| Gradient (T% B)        | 0/10,1/10,10/95,15/95. 15. 1/10        | Run Time            | 20 minute                                                                        |
| Flow Rate              | 0.8 mL/min                             | Proc. Chnl. Descr.: | 2998 PDA MaxPlot (190.0 nm to 800.0 nm) (2998(210-400) nm) Subtracted from blank |
| Column oven Temp       | Ambient                                | Acq. Method Set:    | Method_1_COL-2                                                                   |
| Diluent: MeOH          |                                        |                     |                                                                                  |

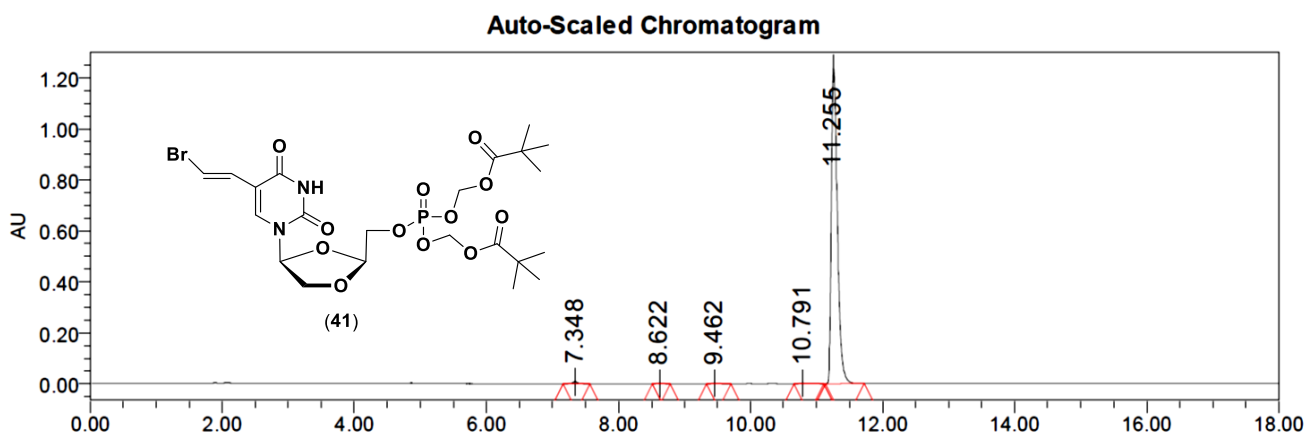

**Peak Results**

|   | RT     | Area    | % Area |
|---|--------|---------|--------|
| 1 | 7.348  | 44197   | 0.55   |
| 2 | 8.622  | 11801   | 0.15   |
| 3 | 9.462  | 17042   | 0.21   |
| 4 | 10.791 | 24910   | 0.31   |
| 5 | 11.255 | 7996494 | 98.79  |

## HPLC method and trace for compound (47)

| HPLC Method Conditions |                                  |                     |                                                                                  |
|------------------------|----------------------------------|---------------------|----------------------------------------------------------------------------------|
| Column                 | XBridge C18 (4.6x150), mm, 3.5µm | Sample              | YK-02-26-P                                                                       |
| Mobile Phase-A         | 10mM Ammonium Acetate in water   | Vial                | 1:F                                                                              |
| Mobile Phase-B         | 100% Acetonitrile                | Injection Volume    | 0.5 µL                                                                           |
| Gradient (T% B)        | 0/10,1/10,10/95,15/95. 15. 1/10  | Rum Time            | 20 minute                                                                        |
| Flow Rate              | 0.8 mL/min                       | Proc. Chnl. Descr.: | 2998 PDA MaxPlot (190.0 nm to 800.0 nm) (2998(210-400) nm) Subtracted from blank |
| Column oven Temp       | Ambient                          | Acq. Method Set:    | Method_1_COL-2                                                                   |
| Diluent: MeOH          |                                  |                     |                                                                                  |

### Auto-Scaled Chromatogram

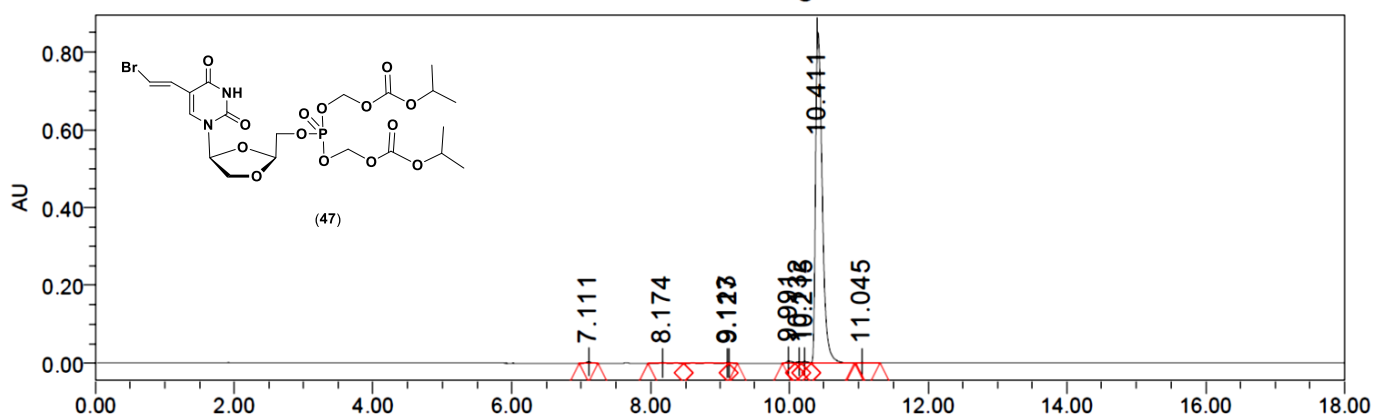

#### Peak Results

|   | RT     | Area    | % Area |
|---|--------|---------|--------|
| 1 | 7.111  | 16180   | 0.28   |
| 2 | 8.174  | 8653    | 0.15   |
| 3 | 9.113  | 13805   | 0.24   |
| 4 | 9.127  | 3178    | 0.05   |
| 5 | 9.991  | 30861   | 0.53   |
| 6 | 10.132 | 15077   | 0.26   |
| 7 | 10.215 | 24301   | 0.42   |
| 8 | 10.411 | 5694194 | 97.91  |

|   | RT     | Area | % Area |
|---|--------|------|--------|
| 9 | 11.045 | 9239 | 0.16   |
